# Supplementary material for: Comprehensive Analysis of Cucumber Gibberellin Oxidase Family Genes and Functional Characterization of CsGA20ox1 in Root Development in Arabidopsis
Source: MDPI journal article supplement (doi:10.3390/ijms19103135), 2018-10-12
Supplement: s1 [file s1]

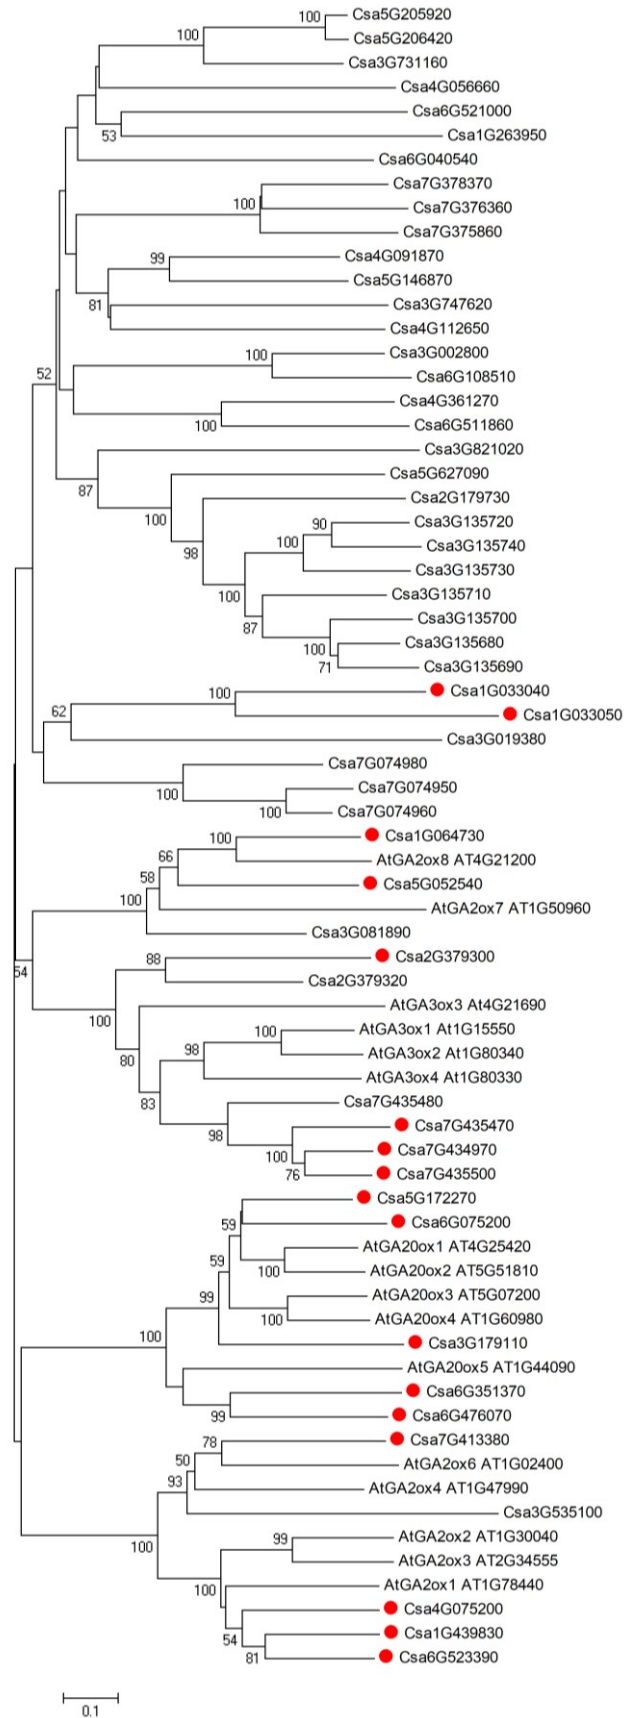

**Figure S1.** Phylogenetic analysis candidate *GAox* genes in cucumber. The neighborjoining tree includes 53 candidate *GAox* proteins from cucumber and 16 *AtGAox* proteins. The 17 *CsGAox* were labeled by red dots.

|           |                                                                                                |     |
|-----------|------------------------------------------------------------------------------------------------|-----|
| CsGA20ox5 | .....MDSNISQLESQECAPN.....EALFFLHASKLTHLTFVQSKFIWFGDLV...                                      | 46  |
| CsGA20ox2 | .....MESTIVVGVAV.....IILFTVWFKRK.....LREFVWFGELAG...                                           | 38  |
| CsGA20ox3 | .....HTLCLMNN.....NIFSNFPI.....IPQIWFCHFP...                                                   | 37  |
| CsGA20ox4 | .....MATECMNSGRDSTQ.....RVEFGCSSESM.....VERFVWCEFFK...                                         | 40  |
| AtGA20ox1 | .....MAVSFTTSPFEEDK.PRLGLG.NI...TSFLIFNFSMLNLQAN.....INQFIWFCEFFK...                           | 53  |
| AtGA20ox2 | .....MAILCTTSPARKEHEPQDLKQD...TSFLIFNFSMLNLQSC.....INQFIWFCEFFK...                             | 55  |
| AtGA20ox3 | .....MATECIATVQIFSE.....NNT.RE...DSS.IFDAILNQHSHH.....IPQCFVWCEFFK...                          | 50  |
| AtGA20ox4 | .....MECITLFGQRHC.....NBS.RH...NFIETLIVNLFNQH.....IPQCFVWCEFFK...                              | 49  |
| CsGA20ox1 | .....MHVVTSSMAFEAAN.....ND...GVFLVFDASVLRHQHF.....IPQCFVWCEFFK...                              | 47  |
| OsGA20ox1 | .....MSMVVQCECF.....VVFDAVLSCQE.....ISQCFWAEAFSFGS...                                          | 38  |
| OsGA20ox3 | .....MAA.....VVFDAVLSCQE.....IACQFVWAEAFPAAD...                                                | 33  |
| OsGA20ox2 | .....MVAEHTFPQPHQPFMDSTAGSG...IAFAAAAACDLRMEF...KIEFFVWNGDAF...                                | 55  |
| OsGA20ox4 | MHASPHQLAHDTLLSLTHTLCTATGTSTRTIAMVYSNAQASKLIVANGGGGADLAAASSAAVVLQWRCPA...KIAFFVWNGDAFVFPFS     | 98  |
| AtGA20ox5 | .....MCTYASGTCTCTTFFVFWK.....SREMSVSWSLISQCFP...VIEFFVWNGDAF...                                | 56  |
| CsGA7ox2  | .....MVNR.EE.....I...TITLADLE...                                                               | 16  |
| OsGA20ox8 | .....MAAT.NN.....VGAGALFVVDLAF...                                                              | 19  |
| CsGA7ox1  | .....MAKDTG.....ITVLDLV...                                                                     | 14  |
| OsGA20ox5 | .....NGLSL.....MDCAFVQAEHR...KASVAEADGIF...                                                    | 29  |
| OsGA20ox7 | .....NAIVELVWAGEQQMGSKRAAEDGGGVDSRETYCRGVHLCDSGITLGNIVLPAISDFGCA                               | 68  |
| OsGA20ox6 | .....                                                                                          | 0   |
|           |                                                                                                |     |
| CsGA20ox5 | ...EAYELSEHVELEGLFGRDFEATEASKLVRFAKRGSGOVTHGVQONLATALHEMGFTINLEFNVKTRASCSHFARMNGESTAHNRFSK     | 142 |
| CsGA20ox2 | ...EERSELRELLDGGFRNGEEATEAAAHVRAKRGSGOVTHGVQONLATALHEMGFTINLEFNVKTRASCSHFARMNGESTAHNRFSK       | 133 |
| CsGA20ox3 | ...LNLGVHVPET.....ILNMGVETVIAKRGSGOVTHGVQONLATALHEMGFTINLEFNVKTRASCSHFARMNGESTAHNRFSK          | 115 |
| CsGA20ox4 | ...EGLGLQVHIDQLKNSQSDIEETIRLVEAKKRGSGOVTHGVQONLATALHEMGFTINLEFNVKTRASCSHFARMNGESTAHNRFSK       | 135 |
| AtGA20ox1 | ...INVLELVFLICQNLSS.DFSSTLCASLISEACKKRGSGOVTHGVQONLATALHEMGFTINLEFNVKTRASCSHFARMNGESTAHNRFSK   | 147 |
| AtGA20ox2 | ...IDIFELNVFIDLS.....SQDSELEAFVIAACTRGSGOVTHGVQONLATALHEMGFTINLEFNVKTRASCSHFARMNGESTAHNRFSK    | 145 |
| AtGA20ox3 | ...ITVQVLQVLLLAGLSEGLSECLASEATLIVSVAATGSGOVTHGVQONLATALHEMGFTINLEFNVKTRASCSHFARMNGESTAHNRFSK   | 145 |
| AtGA20ox4 | ...RVNVLQVFLLAGLSEGLSECLASEATLIVSVAATGSGOVTHGVQONLATALHEMGFTINLEFNVKTRASCSHFARMNGESTAHNRFSK    | 144 |
| CsGA20ox1 | ...HGFENEVLIDLSGLSGLSKDVREAVRVHVGACKEKRGSGOVTHGVQONLATALHEMGFTINLEFNVKTRASCSHFARMNGESTAHNRFSK  | 142 |
| OsGA20ox1 | ...VAVELVALIVVGAGAE.....RSSVVGVEACERGGSGOVTHGVQONLATALHEMGFTINLEFNVKTRASCSHFARMNGESTAHNRFSK    | 128 |
| OsGA20ox3 | ...GVVEELIAPVVLAAFLA.....SGGIGRIVAEACERGGSGOVTHGVQONLATALHEMGFTINLEFNVKTRASCSHFARMNGESTAHNRFSK | 123 |
| OsGA20ox2 | ...ASAEELHVEVVGVRDGAELGRRAAACVAAAGATGSGOVTHGVQONLATALHEMGFTINLEFNVKTRASCSHFARMNGESTAHNRFSK     | 150 |
| OsGA20ox4 | ...SEFTGELVGVVLAALALDAGCHRAVACVAAAGATGSGOVTHGVQONLATALHEMGFTINLEFNVKTRASCSHFARMNGESTAHNRFSK    | 193 |
| AtGA20ox5 | ...SEGLDILIELISQFIMNGEATOLAAAVRVAQAAAGATGSGOVTHGVQONLATALHEMGFTINLEFNVKTRASCSHFARMNGESTAHNRFSK | 150 |
| CsGA7ox2  | ...FLKELDQGSYSDDDQKFKRAAIIETIGACSEHSGOVTHGVQONLATALHEMGFTINLEFNVKTRASCSHFARMNGESTAHNRFSK       | 104 |
| OsGA20ox2 | ...FLATGD.....DEGVARASATAGVREACRDUHGRAVHGVFAELHARLELSAAFALED.EENRAVARVEGSEAFAGYA.RQAFH         | 107 |
| CsGA7ox1  | ...FSAQNE.....TEAKRFATITTCSSGSGOVTHGVQONLATALHEMGFTINLEFNVKTRASCSHFARMNGESTAHNRFSK             | 92  |
| OsGA20ox5 | ...VILIS.FLLAAG...DGGACVVALAEVGRSRDGSOVTHGVQONLATALHEMGFTINLEFNVKTRASCSHFARMNGESTAHNRFSK       | 117 |
| OsGA20ox7 | GAAAGGSGSVFVFLSLR...VSGRAVLTLDLAEHGVFAELHARLELSAAFALED.EENRAVARVEGSEAFAGYA.RQAFH               | 166 |
| OsGA20ox6 | ...NVEIATILR...LAGGGGAEZARLACARLEHVSCHVPPQCAEMKAARVALDLECAHNAADIIF.....SGVFPETAN               | 83  |
|           |                                                                                                |     |
| CsGA20ox5 | LPWKETSFSGFDCHNSF.NNPFSSVDFSSITLGEF.FEIGVYIEKCEANRLSLALTELGISGLE...BSHFRKFF.EDGSSIMRINLYFCQGG  | 236 |
| CsGA20ox2 | LPWKETSFSEISNDL...SGPLVHLHMFSLFGCF.EMTGNVYQCEANRTALMHLAIDSLGVE...RYHFRFF.EDGSSIMRINLYFCQGG     | 225 |
| CsGA20ox3 | LPWKETSFSTYADCN...HGVETVFWAGETW.RVNGVLQCEANRTALMHLAIDSLGVE...RYHFRFF.EDGSSIMRINLYFCQGG         | 206 |
| CsGA20ox4 | LPWKETSFVEYVADH...KSTAHDFIQIGNEL.SHGGRVYQCEANRTALMHLAIDSLGVE...RYHFRFF.EDGSSIMRINLYFCQGG       | 226 |
| AtGA20ox1 | LPWKETSFSEFCDDMS...RSKSVQDFVCDALGHGF.QFGGRVYQCEANRLSLALTELGISGLE...BSHFRKFF.EDGSSIMRINLYFCQGG  | 239 |
| AtGA20ox2 | LPWKETSFSGFSDNMS...GSRVQDFVSDTLGHEF.QFGGRVYQCEANRLSLALTELGISGLE...BSHFRKFF.EDGSSIMRINLYFCQGG   | 237 |
| AtGA20ox3 | LPWKETSFSEFSPEEK...IHSCVTVGVSRHMGEGY.EFEGRVYQCEANRLSLALTELGISGLE...BSHFRKFF.EDGSSIMRINLYFCQGG  | 238 |
| AtGA20ox4 | LPWKETSFSEFTEKENSQVTVNGLVGRVYQCEANRLSLALTELGISGLE...BSHFRKFF.EDGSSIMRINLYFCQGG                 | 234 |
| CsGA20ox1 | LPWKETSFSEFSADES...LDHVFHYLSTLGEF.ANGRVYQCEANRLSLALTELGISGLE...BSHFRKFF.EDGSSIMRINLYFCQGG      | 234 |
| OsGA20ox1 | LPWKETSFSEYSSAGDEE.GEEGVGYLVRKLGAGRRGLGEVYSRCHENSRLSELMVEGSEGVDRGRHFRFF.CRNCSIMRINLYFCQGG      | 226 |
| OsGA20ox3 | LPWKETSFSEFNCAPGN...ARMVADYFVADLGEY.RHMGVYQCEANRLSLALTELGISGLE...BSHFRKFF.EDGSSIMRINLYFCQGG    | 215 |
| OsGA20ox2 | LPWKETSFSGFHDAAPF...VVADYFVADLGEY.RHMGVYQCEANRLSLALTELGISGLE...BSHFRKFF.EDGSSIMRINLYFCQGG      | 241 |
| OsGA20ox4 | LPWKETSFSEFHHAAAGNNSVADYFS.TLQDCEP.RHMGVYQCEANRLSLALTELGISGLE...BSHFRKFF.EDGSSIMRINLYFCQGG     | 287 |
| AtGA20ox5 | LPWKETSFSEFHHAAAGNNSVADYFS.TLQDCEP.RHMGVYQCEANRLSLALTELGISGLE...BSHFRKFF.EDGSSIMRINLYFCQGG     | 287 |
| CsGA7ox2  | SEKXNE.FNNFPHST.....FNVFSEH.QFREFVEELFSFVKTASVIEINCEGLP...FNLSEY.NDRNMLSTRFYNAE                | 190 |
| OsGA20ox8 | SEKXNE.FNNFPHST.....FNVFSEH.QFREFVEELFSFVKTASVIEINCEGLP...FNLSEY.NDRNMLSTRFYNAE                | 187 |
| CsGA7ox1  | CVKNE.FVLFVFGSN.....FNVFSEH.QFREFVEELFSFVKTASVIEINCEGLP...FNLSEY.NDRNMLSTRFYNAE                | 175 |
| OsGA20ox5 | LPWKETFLVFCPTFFPTAVAGDLVGNMFECDLPGFRAMEEAGEAEVLAFLMLLASEGLR...FRLHGFPHDQDTTFLHNFHFCISFD        | 213 |
| OsGA20ox7 | LPWKETFLVFCPTFFPTAVAGDLVGNMFECDLPGFRAMEEAGEAEVLAFLMLLASEGLR...FRLHGFPHDQDTTFLHNFHFCISFD        | 213 |
| OsGA20ox6 | LPWKETFLVFCPTFFPTAVAGDLVGNMFECDLPGFRAMEEAGEAEVLAFLMLLASEGLR...FRLHGFPHDQDTTFLHNFHFCISFD        | 261 |
|           |                                                                                                |     |
| CsGA20ox5 | VAGTGHGPTPTSLILHQ.DVGGHGLP.....ANNQHSVETFPNALVNGGLFMQNGEYKSCVHSAVNNYKERRSLAFFLORKNRVWFEF       | 329 |
| CsGA20ox2 | LITGTHGPTPTSLILHQ.DVGGHGLP.....ANNQHSVETFPNALVNGGLFMQNGEYKSCVHSAVNNYKERRSLAFFLORKNRVWFEF       | 318 |
| CsGA20ox3 | LITGTHGPTPTSLILHQ.DVGGHGLP.....ANNQHSVETFPNALVNGGLFMQNGEYKSCVHSAVNNYKERRSLAFFLORKNRVWFEF       | 300 |
| CsGA20ox4 | LITGTHGPTPTSLILHQ.DVGGHGLP.....ANNQHSVETFPNALVNGGLFMQNGEYKSCVHSAVNNYKERRSLAFFLORKNRVWFEF       | 319 |
| AtGA20ox1 | LITGTHGPTPTSLILHQ.DVGGHGLP.....ANNQHSVETFPNALVNGGLFMQNGEYKSCVHSAVNNYKERRSLAFFLORKNRVWFEF       | 332 |
| AtGA20ox2 | LITGTHGPTPTSLILHQ.DVGGHGLP.....ANNQHSVETFPNALVNGGLFMQNGEYKSCVHSAVNNYKERRSLAFFLORKNRVWFEF       | 330 |
| AtGA20ox3 | LITGTHGPTPTSLILHQ.DVGGHGLP.....ANNQHSVETFPNALVNGGLFMQNGEYKSCVHSAVNNYKERRSLAFFLORKNRVWFEF       | 331 |
| AtGA20ox4 | LITGTHGPTPTSLILHQ.DVGGHGLP.....ANNQHSVETFPNALVNGGLFMQNGEYKSCVHSAVNNYKERRSLAFFLORKNRVWFEF       | 332 |
| CsGA20ox1 | LITGTHGPTPTSLILHQ.DVGGHGLP.....ANNQHSVETFPNALVNGGLFMQNGEYKSCVHSAVNNYKERRSLAFFLORKNRVWFEF       | 327 |
| OsGA20ox1 | DTGTHGPTPTSLILHQ.DVGGHGLP.....AEGRWRAIRFPGALVNGGLFMQNGEYKSCVHSAVNNYKERRSLAFFLORKNRVWFEF        | 319 |
| OsGA20ox3 | LITGTHGPTPTSLILHQ.DVGGHGLP.....AEGRWRAIRFPGALVNGGLFMQNGEYKSCVHSAVNNYKERRSLAFFLORKNRVWFEF       | 314 |
| OsGA20ox2 | RTGTHGPTPTSLILHQ.DVGGHGLP.....VDEGRVPSVPGAMVNGGLFMQNGEYKSCVHSAVNNYKERRSLAFFLORKNRVWFEF         | 334 |
| OsGA20ox4 | RTGTHGPTPTSLILHQ.DVGGHGLP.....VDEGRVPSVPGAMVNGGLFMQNGEYKSCVHSAVNNYKERRSLAFFLORKNRVWFEF         | 381 |
| AtGA20ox5 | RTGTHGPTPTSLILHQ.DVGGHGLP.....VDEGRVPSVPGAMVNGGLFMQNGEYKSCVHSAVNNYKERRSLAFFLORKNRVWFEF         | 334 |
| CsGA7ox2  | ENGLREHNNVNEPLIFQ.DVGGHGLP.....TEDHGWPIETNNTLVNNGGLFMQNGEYKSCVHSAVNNYKERRSLAFFLORKNRVWFEF      | 284 |
| OsGA20ox8 | ENGLREHNNVNEPLIFQ.DVGGHGLP.....TEDHGWPIETNNTLVNNGGLFMQNGEYKSCVHSAVNNYKERRSLAFFLORKNRVWFEF      | 280 |
| CsGA7ox1  | GENGLREHNNVNEPLIFQ.DVGGHGLP.....TEDHGWPIETNNTLVNNGGLFMQNGEYKSCVHSAVNNYKERRSLAFFLORKNRVWFEF     | 254 |
| OsGA20ox5 | LAVGTHGPTPTSLILHQ.DVGGHGLP.....RSDGVNVRVVEHSTFNGGLFMQNGEYKSCVHSAVNNYKERRSLAFFLORKNRVWFEF       | 308 |
| OsGA20ox7 | LITGTHGPTPTSLILHQ.DVGGHGLP.....ANNQHSVETFPNALVNGGLFMQNGEYKSCVHSAVNNYKERRSLAFFLORKNRVWFEF       | 343 |
| OsGA20ox6 | GSFVCHVPSGFIPLVQDCEVGHGLP.....AGEVTVPLIPSGFVNGGLFMQNGEYKSCVHSAVNNYKERRSLAFFLORKNRVWFEF         | 261 |
|           |                                                                                                |     |
| CsGA20ox5 | ELVAD...CESRVPFTNSHSELEFTRQHYRADATINQTRWVSSR.FCOH.....                                         | 378 |
| CsGA20ox2 | CLVGR...EGRVPFTNSHSELEFTRQHYRADATINQTRWVSSR.FCOH.....                                          | 370 |
| CsGA20ox3 | CLVVE...RWRVLPQGRHPTFPLRSQHYRADATINQTRWVSSR.FCOH.....                                          | 347 |
| CsGA20ox4 | EVVER...NFRVPFTNSHSELEFTRQHYRADATINQTRWVSSR.FCOH.....                                          | 376 |
| AtGA20ox1 | ELDS...ITSRVPFTNSHSELEFTRQHYRADATINQTRWVSSR.FCOH.....                                          | 377 |
| AtGA20ox2 | DILER...MTRVPFTNSHSELEFTRQHYRADATINQTRWVSSR.FCOH.....                                          | 378 |
| AtGA20ox3 | ELVNGVSGRVPFTNSHSELEFTRQHYRADATINQTRWVSSR.FCOH.....                                            | 380 |
| AtGA20ox4 | ELV...SEARVPFTNSHSELEFTRQHYRADATINQTRWVSSR.FCOH.....                                           | 376 |
| CsGA20ox1 | ELVEN...ENFRVPFTNSHSELEFTRQHYRADATINQTRWVSSR.FCOH.....                                         | 373 |
| OsGA20ox1 | ELVDD...HFRVPFTNSHSELEFTRQHYRADATINQTRWVSSR.FCOH.....                                          | 372 |
| OsGA20ox3 | ALVDA...AHRVPFTNSHSELEFTRQHYRADATINQTRWVSSR.FCOH.....                                          | 367 |
| OsGA20ox2 | ...SAA...TFCHVPFTNSHSELEFTRQHYRADATINQTRWVSSR.FCOH.....                                        | 389 |
| OsGA20ox4 | GAGAG...EPLVPFTNSHSELEFTRQHYRADATINQTRWVSSR.FCOH.....                                          | 444 |
| AtGA20ox5 | ELVGE...EASVPFTNSHSELEFTRQHYRADATINQTRWVSSR.FCOH.....                                          | 385 |
| CsGA7ox2  | HTTH.IDQFPNRSYKRYQLRLNNTHFSNQDIINISYSTT.....                                                   | 331 |
| OsGA20ox8 | EYTER.IGEAFFNRSYKRYQLRLNNTHFSNQDIINISYSTT.....                                                 | 326 |
| CsGA7ox1  | HCHSS.LKHLERNQ.....NTRKFSKIKTF.....                                                            | 279 |
| OsGA20ox5 | EVVSE...ESPARNNTNNGEFTSRKNSFKLEVENVCTHFRKN.....                                                | 352 |
| OsGA20ox7 | ELIDD...RHRNNTNNGEFTSRKNSFKLEVENVCTHFRKN.....                                                  | 383 |
| OsGA20ox6 | ELVGE...EHRVPFTNSHSELEFTRQHYRADATINQTRWVSSR.FCOH.....                                          | 300 |

**Figure S2.** Multiple sequence alignments of GA20ox proteins from 5 CsGA20ox proteins, 5 AtGA20ox proteins, 8 OsGA20ox protein and 2 CsGA7ox proteins. The GA20ox conserved sequence LPWKET was labeled in green box. Amino acid identity of 100% is marked with a black background, amino acids identity of higher than 75% is marked with a pink background, amino acids identity of more than 50% is marked with a light green background.

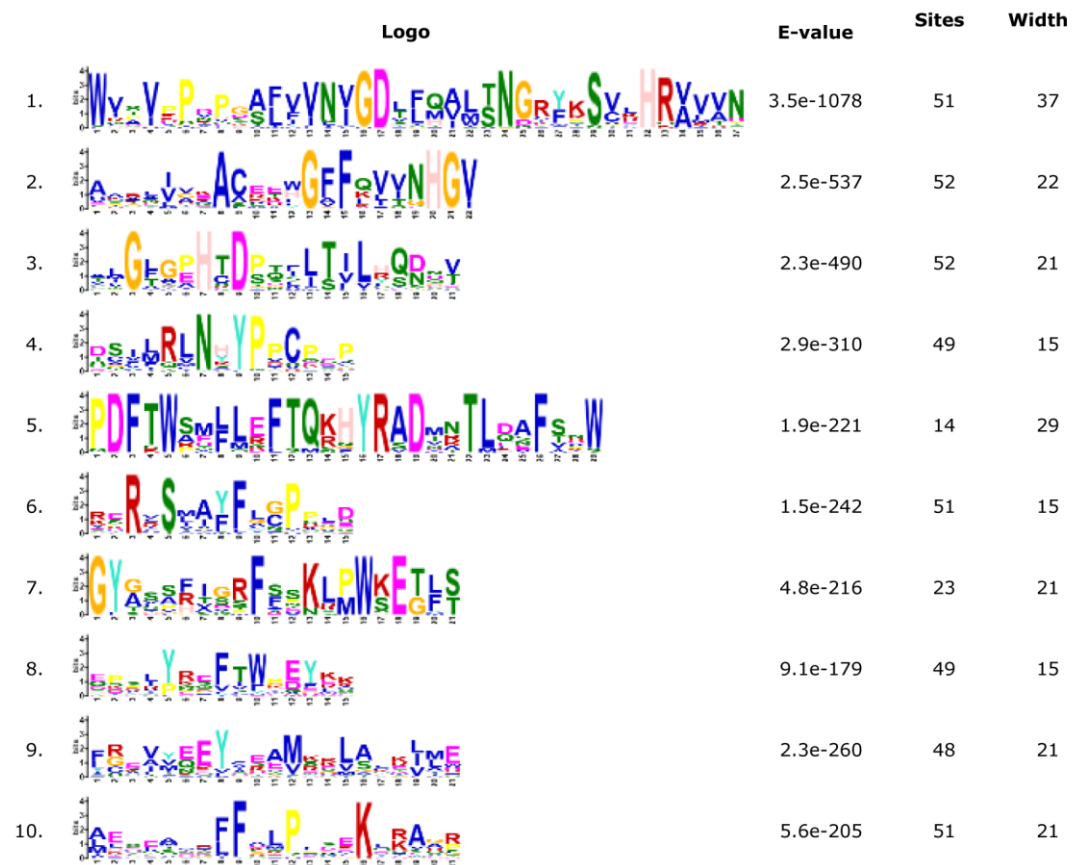

**Figure S3.** Ten conserved motifs from all GAox proteins from cucumber, *Arabidopsis* and rice. The logos of ten conserved motif sequences were obtained from MEME Suite website. The bit score means information content of each position in the amino acid sequence.

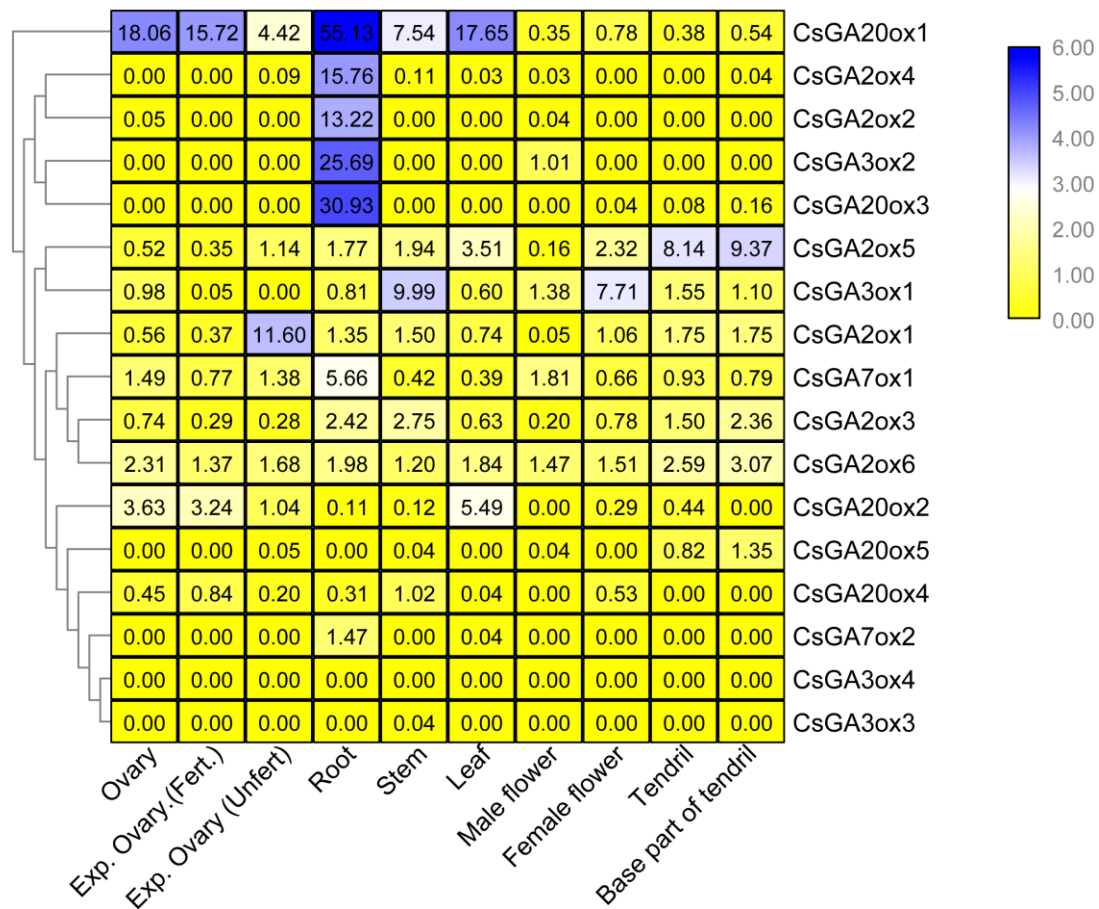

**Figure S4.** Heatmap of the expression profiles of CsGAox family genes in 10 cucumber tissues. Values, which were shown on the heatmap, represent the average FPKM value of three biological replicates. Clustering was based on log2-transformed FPKM values of 17 CsGAox genes. Ovary, cucumber ovary tissue (unexpanded); Exp. Ovary.(Fert.), cucumber expanded ovary tissue (fertilized); Exp. Ovary.(UnFert.), cucumber expanded ovary tissue (unfertilized).
