# Supplementary material for: Comprehensive Analysis of Cucumber Gibberellin Oxidase Family Genes and Functional Characterization of CsGA20ox1 in Root Development in Arabidopsis
Source: Int J Mol Sci. 2018 Oct 12;19(10):3135. doi: 10.3390/ijms19103135 (PMC6213227; doi:10.3390/ijms19103135)
Supplement: Supplementary file 1 [file ijms-19-03135-s001.zip]

Archive with 4 entries (4 files):
- Supplementary figures.pdf
- Table S1.xls
- Table S2.xls
- Table S3.xls
