# Supplementary material for: Comprehensive Analysis of Cucumber Gibberellin Oxidase Family Genes and Functional Characterization of CsGA20ox1 in Root Development in Arabidopsis
Source: Int J Mol Sci. 2018 Oct 12;19(10):3135. doi: 10.3390/ijms19103135 (PMC6213227; doi:10.3390/ijms19103135)
Supplement: Supplementary file 1 [file ijms-19-03135-s001.zip › Table S1.xls]

## Sheet: Tandem duplication gene pairs
Table S1 All tandem duplication and segmental duplication events in cucumber genome
Tandem duplication gene1	Tandem duplication gene2
Csa1G000610.1	Csa1G000610.2
Csa1G000630.1	Csa1G000630.2
Csa1G001360.1	Csa1G001370.1
Csa1G001410.1	Csa1G001410.2
Csa1G001480.1	Csa1G001480.2
Csa1G002160.1	Csa1G002660.1
Csa1G002820.2	Csa1G002820.1
Csa1G002880.1	Csa1G002880.2
Csa1G003450.1	Csa1G003450.2
Csa1G004060.1	Csa1G004060.2
Csa1G004250.1	Csa1G004250.2
Csa1G004290.1	Csa1G004290.2
Csa1G004910.2	Csa1G004910.1
Csa1G004920.1	Csa1G004920.2
Csa1G004940.1	Csa1G004940.2
Csa1G004960.2	Csa1G004960.1
Csa1G004960.1	Csa1G004960.3
Csa1G004960.3	Csa1G004960.4
Csa1G004980.2	Csa1G004980.1
Csa1G005590.1	Csa1G005590.2
Csa1G005630.1	Csa1G005630.2
Csa1G005640.1	Csa1G005640.3
Csa1G005640.4	Csa1G005640.2
Csa1G005640.3	Csa1G005640.4
Csa1G007880.1	Csa1G007880.2
Csa1G007890.1	Csa1G007900.1
Csa1G008450.1	Csa1G008460.1
Csa1G008460.1	Csa1G008470.1
Csa1G008530.1	Csa1G008540.1
Csa1G009600.1	Csa1G009610.1
Csa1G009620.1	Csa1G009630.1
Csa1G009660.1	Csa1G009660.2
Csa1G009930.1	Csa1G010930.1
Csa1G011550.1	Csa1G011550.2
Csa1G011560.1	Csa1G011560.2
Csa1G011560.2	Csa1G011560.3
Csa1G011560.3	Csa1G011560.4
Csa1G012150.1	Csa1G012150.3
Csa1G012150.3	Csa1G012150.2
Csa1G012660.1	Csa1G012660.2
Csa1G013170.1	Csa1G013180.1
Csa1G014420.1	Csa1G014430.1
Csa1G014450.1	Csa1G014450.2
Csa1G015630.1	Csa1G015630.2
Csa1G015700.1	Csa1G015710.1
Csa1G015740.1	Csa1G015750.1
Csa1G015760.1	Csa1G015770.1
Csa1G015790.1	Csa1G015790.2
Csa1G015840.1	Csa1G015850.1
Csa1G021920.1	Csa1G021930.1
Csa1G021930.1	Csa1G021930.2
Csa1G021980.1	Csa1G022480.1
Csa1G022480.1	Csa1G022490.1
Csa1G023080.1	Csa1G023080.2
Csa1G024250.1	Csa1G024250.2
Csa1G024870.1	Csa1G024870.2
Csa1G024880.1	Csa1G024890.1
Csa1G024890.1	Csa1G024900.1
Csa1G024900.1	Csa1G024910.1
Csa1G025080.1	Csa1G025080.2
Csa1G025140.1	Csa1G025140.2
Csa1G025140.2	Csa1G025140.3
Csa1G025140.3	Csa1G025140.4
Csa1G025780.2	Csa1G025780.1
Csa1G025780.3	Csa1G025780.2
Csa1G031730.1	Csa1G031730.2
Csa1G031730.2	Csa1G031730.3
Csa1G031750.1	Csa1G031750.2
Csa1G031750.2	Csa1G031750.3
Csa1G031820.1	Csa1G031820.2
Csa1G031830.2	Csa1G031830.1
Csa1G031830.1	Csa1G031830.4
Csa1G031830.3	Csa1G031830.2
Csa1G031860.1	Csa1G031860.2
Csa1G033040.1	Csa1G033050.1
Csa1G033120.1	Csa1G033130.1
Csa1G033130.1	Csa1G033140.1
Csa1G033140.1	Csa1G033150.1
Csa1G033150.1	Csa1G033160.1
Csa1G033160.1	Csa1G033170.1
Csa1G033300.1	Csa1G033300.2
Csa1G038360.1	Csa1G038360.2
Csa1G038900.1	Csa1G038900.2
Csa1G038980.1	Csa1G038980.2
Csa1G038980.2	Csa1G038980.3
Csa1G038980.3	Csa1G038980.4
Csa1G039000.1	Csa1G039000.2
Csa1G039020.1	Csa1G039020.2
Csa1G039030.1	Csa1G039040.1
Csa1G039060.1	Csa1G039060.2
Csa1G039060.2	Csa1G039060.3
Csa1G039130.1	Csa1G039140.1
Csa1G039180.1	Csa1G039190.1
Csa1G039190.1	Csa1G039190.2
Csa1G039230.2	Csa1G039230.1
Csa1G039260.1	Csa1G039260.2
Csa1G039310.1	Csa1G039320.1
Csa1G039890.1	Csa1G039890.2
Csa1G039890.2	Csa1G039890.3
Csa1G039970.1	Csa1G039970.3
Csa1G039970.3	Csa1G039970.2
Csa1G039990.1	Csa1G039990.2
Csa1G040510.1	Csa1G040520.1
Csa1G040520.1	Csa1G041520.1
Csa1G042140.1	Csa1G042140.2
Csa1G042140.2	Csa1G042140.4
Csa1G042140.4	Csa1G042140.3
Csa1G042260.1	Csa1G042260.2
Csa1G042310.1	Csa1G042310.2
Csa1G042430.1	Csa1G042440.1
Csa1G042480.1	Csa1G042490.1
Csa1G042490.1	Csa1G042500.1
Csa1G042500.1	Csa1G042510.1
Csa1G042530.1	Csa1G042540.1
Csa1G042600.2	Csa1G042600.1
Csa1G042620.1	Csa1G042620.2
Csa1G042720.1	Csa1G042720.2
Csa1G042730.1	Csa1G042730.2
Csa1G042750.1	Csa1G042750.2
Csa1G042750.2	Csa1G042750.3
Csa1G042800.1	Csa1G042800.2
Csa1G042820.1	Csa1G042820.2
Csa1G042830.1	Csa1G042830.2
Csa1G042840.1	Csa1G042840.2
Csa1G042880.1	Csa1G042880.2
Csa1G043050.1	Csa1G043050.2
Csa1G043070.1	Csa1G043070.2
Csa1G043070.2	Csa1G043070.3
Csa1G043170.1	Csa1G043170.2
Csa1G043180.1	Csa1G043180.2
Csa1G043190.1	Csa1G043190.2
Csa1G043200.1	Csa1G043210.1
Csa1G043210.1	Csa1G043220.1
Csa1G044830.1	Csa1G044840.1
Csa1G044840.1	Csa1G044850.1
Csa1G044860.1	Csa1G044860.2
Csa1G044890.1	Csa1G044890.2
Csa1G044910.1	Csa1G044910.2
Csa1G044910.2	Csa1G044910.3
Csa1G045470.1	Csa1G045470.2
Csa1G045500.2	Csa1G045500.1
Csa1G045550.1	Csa1G045550.2
Csa1G045550.2	Csa1G045550.3
Csa1G045650.1	Csa1G045660.1
Csa1G045660.1	Csa1G045670.1
Csa1G045770.1	Csa1G045770.2
Csa1G045820.1	Csa1G045820.2
Csa1G045820.2	Csa1G045820.3
Csa1G045820.3	Csa1G045820.4
Csa1G046140.1	Csa1G046140.2
Csa1G046140.3	Csa1G046140.1
Csa1G046190.1	Csa1G046190.2
Csa1G046910.2	Csa1G046910.1
Csa1G046910.1	Csa1G046910.5
Csa1G046910.4	Csa1G046910.2
Csa1G046910.3	Csa1G046910.4
Csa1G048950.1	Csa1G048950.2
Csa1G050040.1	Csa1G050040.2
Csa1G050210.1	Csa1G050220.1
Csa1G050240.1	Csa1G050240.2
Csa1G050240.2	Csa1G050240.3
Csa1G050240.3	Csa1G050240.4
Csa1G050240.4	Csa1G050250.1
Csa1G050280.1	Csa1G050290.1
Csa1G050290.1	Csa1G050300.1
Csa1G050300.1	Csa1G050300.2
Csa1G050420.1	Csa1G050420.2
Csa1G050420.2	Csa1G050420.3
Csa1G051590.1	Csa1G051590.2
Csa1G051650.1	Csa1G051660.1
Csa1G051660.1	Csa1G051670.1
Csa1G051670.1	Csa1G051680.1
Csa1G051710.1	Csa1G051710.2
Csa1G051710.2	Csa1G051720.1
Csa1G051770.2	Csa1G051770.1
Csa1G051850.1	Csa1G051860.1
Csa1G051860.1	Csa1G051870.1
Csa1G051870.1	Csa1G051880.1
Csa1G051900.1	Csa1G051900.2
Csa1G056910.1	Csa1G056910.2
Csa1G056970.1	Csa1G056970.2
Csa1G056970.2	Csa1G056970.3
Csa1G056970.3	Csa1G056970.4
Csa1G057030.1	Csa1G057030.2
Csa1G057050.1	Csa1G057060.1
Csa1G058070.1	Csa1G058080.1
Csa1G058080.1	Csa1G058090.1
Csa1G058110.1	Csa1G058110.2
Csa1G058110.2	Csa1G058120.1
Csa1G058670.1	Csa1G058680.1
Csa1G060760.1	Csa1G060770.1
Csa1G060780.1	Csa1G062280.1
Csa1G062370.1	Csa1G062370.2
Csa1G062940.1	Csa1G062940.2
Csa1G063500.1	Csa1G063500.2
Csa1G063540.1	Csa1G063550.1
Csa1G064140.1	Csa1G064140.2
Csa1G064160.1	Csa1G064170.1
Csa1G064780.1	Csa1G064790.1
Csa1G064790.1	Csa1G064800.1
Csa1G064840.1	Csa1G064850.1
Csa1G064870.1	Csa1G065370.1
Csa1G065380.1	Csa1G065390.1
Csa1G065420.1	Csa1G065920.1
Csa1G065920.1	Csa1G065930.1
Csa1G066530.1	Csa1G066530.2
Csa1G066550.1	Csa1G066560.1
Csa1G066570.1	Csa1G068570.1
Csa1G068570.1	Csa1G070070.1
Csa1G070600.1	Csa1G070610.1
Csa1G070610.1	Csa1G070620.1
Csa1G071130.1	Csa1G071140.1
Csa1G071140.1	Csa1G071150.1
Csa1G071150.1	Csa1G071160.1
Csa1G071160.1	Csa1G071170.1
Csa1G071170.1	Csa1G071180.1
Csa1G071200.1	Csa1G071210.1
Csa1G071210.1	Csa1G071220.1
Csa1G071220.1	Csa1G071230.1
Csa1G071230.1	Csa1G071240.1
Csa1G071270.1	Csa1G071270.2
Csa1G071270.2	Csa1G071280.1
Csa1G071900.1	Csa1G071900.2
Csa1G071910.1	Csa1G071910.2
Csa1G071920.1	Csa1G071920.2
Csa1G072450.1	Csa1G072450.2
Csa1G072450.2	Csa1G072450.3
Csa1G072470.1	Csa1G072470.2
Csa1G073090.1	Csa1G073100.1
Csa1G073100.1	Csa1G073110.1
Csa1G073610.1	Csa1G073620.1
Csa1G073770.1	Csa1G073770.2
Csa1G073780.1	Csa1G073790.1
Csa1G073790.1	Csa1G073800.1
Csa1G073850.2	Csa1G073850.1
Csa1G075020.1	Csa1G075020.2
Csa1G075580.1	Csa1G075580.2
Csa1G076620.1	Csa1G076620.2
Csa1G077240.1	Csa1G077240.2
Csa1G086920.1	Csa1G086920.2
Csa1G087430.1	Csa1G087430.2
Csa1G088440.1	Csa1G088450.1
Csa1G089500.1	Csa1G089500.2
Csa1G089500.2	Csa1G089500.3
Csa1G095540.1	Csa1G096040.1
Csa1G096100.1	Csa1G096110.1
Csa1G108280.1	Csa1G108280.2
Csa1G108810.1	Csa1G108810.3
Csa1G108810.3	Csa1G108810.2
Csa1G118890.2	Csa1G118890.1
Csa1G120410.1	Csa1G120420.1
Csa1G123490.2	Csa1G123490.1
Csa1G124010.1	Csa1G124020.1
Csa1G132730.1	Csa1G132740.1
Csa1G132760.1	Csa1G132770.1
Csa1G132770.1	Csa1G134270.1
Csa1G145950.1	Csa1G145950.2
Csa1G145960.1	Csa1G145960.2
Csa1G145970.1	Csa1G145980.1
Csa1G153010.2	Csa1G153010.1
Csa1G153010.1	Csa1G153010.3
Csa1G163140.1	Csa1G163140.2
Csa1G165740.1	Csa1G165740.2
Csa1G166770.1	Csa1G166770.2
Csa1G166770.2	Csa1G166770.3
Csa1G168340.1	Csa1G168340.2
Csa1G168880.1	Csa1G168890.1
Csa1G170000.1	Csa1G170000.2
Csa1G170000.2	Csa1G170000.3
Csa1G170000.3	Csa1G170000.4
Csa1G170010.1	Csa1G170010.2
Csa1G171030.1	Csa1G171040.1
Csa1G172610.1	Csa1G172610.2
Csa1G173130.1	Csa1G173130.2
Csa1G181260.1	Csa1G181260.2
Csa1G181310.1	Csa1G181310.2
Csa1G181370.1	Csa1G181370.2
Csa1G181470.1	Csa1G181470.2
Csa1G182070.1	Csa1G183070.1
Csa1G183570.1	Csa1G183570.2
Csa1G186610.2	Csa1G186610.1
Csa1G188670.1	Csa1G188680.1
Csa1G201780.1	Csa1G201780.2
Csa1G207820.1	Csa1G207820.2
Csa1G207820.2	Csa1G207820.3
Csa1G217860.1	Csa1G220860.1
Csa1G220870.1	Csa1G222870.3
Csa1G222870.1	Csa1G222870.2
Csa1G222870.3	Csa1G222870.1
Csa1G226420.1	Csa1G226420.2
Csa1G227450.1	Csa1G227460.1
Csa1G229510.2	Csa1G229510.1
Csa1G250130.1	Csa1G250130.2
Csa1G250150.1	Csa1G250150.2
Csa1G257350.1	Csa1G257350.2
Csa1G257860.1	Csa1G257870.1
Csa1G257940.1	Csa1G257940.2
Csa1G263950.1	Csa1G263960.1
Csa1G264020.1	Csa1G264520.1
Csa1G265080.1	Csa1G265080.2
Csa1G265640.1	Csa1G265650.1
Csa1G266150.1	Csa1G266150.2
Csa1G267180.1	Csa1G267180.2
Csa1G267220.1	Csa1G267230.1
Csa1G267230.1	Csa1G267240.1
Csa1G267770.1	Csa1G267770.2
Csa1G287010.1	Csa1G287020.1
Csa1G295130.1	Csa1G295130.2
Csa1G295130.2	Csa1G295130.3
Csa1G305720.1	Csa1G305720.2
Csa1G305720.3	Csa1G305720.1
Csa1G305760.1	Csa1G305760.2
Csa1G305770.1	Csa1G305770.2
Csa1G320310.1	Csa1G320310.2
Csa1G320350.2	Csa1G320350.1
Csa1G324870.1	Csa1G324870.2
Csa1G348440.1	Csa1G348940.1
Csa1G348940.1	Csa1G348950.1
Csa1G364960.1	Csa1G364960.2
Csa1G385560.2	Csa1G385560.1
Csa1G397120.2	Csa1G397120.1
Csa1G397130.1	Csa1G397130.2
Csa1G403660.1	Csa1G403660.2
Csa1G411740.1	Csa1G411740.2
Csa1G411740.2	Csa1G414240.1
Csa1G418250.1	Csa1G418260.1
Csa1G418790.1	Csa1G418790.2
Csa1G418790.2	Csa1G418790.3
Csa1G420310.1	Csa1G420320.1
Csa1G421890.1	Csa1G421900.1
Csa1G421900.1	Csa1G421910.1
Csa1G421910.1	Csa1G421920.1
Csa1G421920.1	Csa1G421930.1
Csa1G422470.1	Csa1G422480.1
Csa1G422480.1	Csa1G422980.1
Csa1G422980.1	Csa1G422990.1
Csa1G422990.1	Csa1G423000.1
Csa1G423160.1	Csa1G423170.1
Csa1G423180.1	Csa1G423180.2
Csa1G423180.3	Csa1G423180.1
Csa1G423300.1	Csa1G423300.2
Csa1G424870.1	Csa1G424870.2
Csa1G427520.1	Csa1G427530.1
Csa1G433620.1	Csa1G433630.1
Csa1G433630.1	Csa1G434130.1
Csa1G434170.1	Csa1G434170.2
Csa1G434170.2	Csa1G434170.3
Csa1G441330.1	Csa1G441340.1
Csa1G444350.1	Csa1G444360.1
Csa1G444360.1	Csa1G445360.1
Csa1G445890.1	Csa1G445890.2
Csa1G448960.1	Csa1G448960.2
Csa1G448980.2	Csa1G448980.1
Csa1G458990.1	Csa1G458990.2
Csa1G462020.1	Csa1G462020.2
Csa1G462020.2	Csa1G462020.3
Csa1G467190.2	Csa1G467190.1
Csa1G472480.1	Csa1G472980.1
Csa1G475980.1	Csa1G475980.2
Csa1G478050.1	Csa1G478050.2
Csa1G479610.1	Csa1G479610.2
Csa1G480690.1	Csa1G480690.2
Csa1G481220.1	Csa1G481220.2
Csa1G481220.2	Csa1G481220.3
Csa1G498810.1	Csa1G499310.1
Csa1G499310.1	Csa1G499320.1
Csa1G499320.1	Csa1G499330.1
Csa1G501840.1	Csa1G501850.1
Csa1G502860.1	Csa1G502860.2
Csa1G505920.1	Csa1G505920.2
Csa1G505950.2	Csa1G505950.1
Csa1G512470.1	Csa1G513470.1
Csa1G513470.1	Csa1G514470.1
Csa1G522540.1	Csa1G522540.2
Csa1G523620.2	Csa1G523620.1
Csa1G523630.1	Csa1G523640.2
Csa1G523640.2	Csa1G523640.1
Csa1G524680.1	Csa1G524680.2
Csa1G524680.2	Csa1G524680.3
Csa1G524760.1	Csa1G524760.2
Csa1G525270.1	Csa1G525270.2
Csa1G526820.1	Csa1G526830.1
Csa1G526840.1	Csa1G526850.1
Csa1G527350.1	Csa1G527850.1
Csa1G527860.1	Csa1G527870.1
Csa1G528470.2	Csa1G528470.1
Csa1G528510.2	Csa1G528510.1
Csa1G528540.1	Csa1G528550.2
Csa1G528550.2	Csa1G528550.1
Csa1G528580.1	Csa1G528580.2
Csa1G531180.1	Csa1G531190.1
Csa1G532230.1	Csa1G532240.1
Csa1G532240.1	Csa1G532250.1
Csa1G532250.1	Csa1G532260.1
Csa1G532320.1	Csa1G532330.1
Csa1G533490.1	Csa1G533490.2
Csa1G533540.1	Csa1G533540.2
Csa1G533550.1	Csa1G533560.1
Csa1G533590.1	Csa1G533590.2
Csa1G535290.1	Csa1G535290.2
Csa1G535800.1	Csa1G535800.2
Csa1G537490.1	Csa1G537500.1
Csa1G537630.1	Csa1G538130.2
Csa1G538130.2	Csa1G538130.1
Csa1G538130.1	Csa1G538140.1
Csa1G539330.1	Csa1G539340.1
Csa1G539340.1	Csa1G539350.1
Csa1G539350.1	Csa1G540350.1
Csa1G541370.1	Csa1G541380.1
Csa1G541890.1	Csa1G541900.1
Csa1G542480.1	Csa1G542480.2
Csa1G542480.2	Csa1G542480.3
Csa1G542490.1	Csa1G542500.1
Csa1G542500.1	Csa1G542510.1
Csa1G554570.1	Csa1G554570.2
Csa1G554580.1	Csa1G554580.2
Csa1G555080.1	Csa1G555080.2
Csa1G555600.2	Csa1G555600.1
Csa1G555610.1	Csa1G555610.2
Csa1G560640.1	Csa1G560640.2
Csa1G560660.1	Csa1G560660.2
Csa1G560660.2	Csa1G560660.3
Csa1G560720.1	Csa1G560720.2
Csa1G560750.1	Csa1G560760.1
Csa1G560790.1	Csa1G560790.2
Csa1G560800.1	Csa1G560800.2
Csa1G561360.1	Csa1G561360.2
Csa1G561360.2	Csa1G561360.3
Csa1G561390.1	Csa1G561390.2
Csa1G561390.2	Csa1G561390.3
Csa1G561400.1	Csa1G561400.2
Csa1G561420.1	Csa1G561920.1
Csa1G561980.1	Csa1G561980.2
Csa1G568480.1	Csa1G568490.1
Csa1G568490.1	Csa1G568490.2
Csa1G568530.1	Csa1G568530.2
Csa1G568550.1	Csa1G568550.2
Csa1G568570.1	Csa1G568570.2
Csa1G569080.2	Csa1G569080.1
Csa1G569150.1	Csa1G569160.1
Csa1G569190.1	Csa1G569190.2
Csa1G569380.1	Csa1G569380.2
Csa1G569520.1	Csa1G569520.2
Csa1G570070.1	Csa1G570070.2
Csa1G570110.1	Csa1G570120.1
Csa1G570150.1	Csa1G570150.2
Csa1G570150.2	Csa1G570150.3
Csa1G570160.2	Csa1G570160.1
Csa1G570190.1	Csa1G570200.1
Csa1G570210.2	Csa1G570210.1
Csa1G571280.1	Csa1G571280.2
Csa1G571830.1	Csa1G571840.1
Csa1G572970.1	Csa1G572980.1
Csa1G573000.1	Csa1G573000.2
Csa1G573020.1	Csa1G573020.2
Csa1G573030.1	Csa1G573040.1
Csa1G573040.1	Csa1G573050.1
Csa1G573050.1	Csa1G573060.1
Csa1G573060.1	Csa1G573070.1
Csa1G573600.1	Csa1G573600.2
Csa1G574790.1	Csa1G574800.1
Csa1G574800.1	Csa1G574810.1
Csa1G574810.1	Csa1G574820.1
Csa1G574880.1	Csa1G574880.2
Csa1G574950.1	Csa1G574960.1
Csa1G574970.2	Csa1G574970.1
Csa1G575020.1	Csa1G575030.1
Csa1G575050.1	Csa1G575050.2
Csa1G575080.1	Csa1G575080.2
Csa1G575170.1	Csa1G575170.2
Csa1G580200.2	Csa1G580200.1
Csa1G580200.1	Csa1G580200.3
Csa1G580210.1	Csa1G580210.2
Csa1G580250.2	Csa1G580250.1
Csa1G586800.1	Csa1G586800.2
Csa1G586830.1	Csa1G586830.2
Csa1G586840.1	Csa1G586840.2
Csa1G586840.2	Csa1G586840.3
Csa1G587980.1	Csa1G587990.1
Csa1G587990.1	Csa1G588000.1
Csa1G588000.1	Csa1G588500.1
Csa1G588560.1	Csa1G589060.1
Csa1G589110.1	Csa1G589120.1
Csa1G590290.1	Csa1G590290.2
Csa1G590290.2	Csa1G590290.3
Csa1G595900.1	Csa1G595910.1
Csa1G595910.1	Csa1G596410.1
Csa1G596460.1	Csa1G596460.2
Csa1G598330.1	Csa1G598330.2
Csa1G598340.1	Csa1G598340.2
Csa1G598340.2	Csa1G598340.3
Csa1G599420.1	Csa1G599420.2
Csa1G599460.1	Csa1G599470.1
Csa1G599470.1	Csa1G599470.2
Csa1G599480.1	Csa1G599490.1
Csa1G599560.2	Csa1G599560.1
Csa1G600100.1	Csa1G600110.1
Csa1G600110.1	Csa1G600120.1
Csa1G600130.1	Csa1G600140.1
Csa1G600170.1	Csa1G600180.1
Csa1G600770.1	Csa1G600770.2
Csa1G600980.1	Csa1G600980.2
Csa1G602530.1	Csa1G602540.1
Csa1G602540.1	Csa1G604040.1
Csa1G605100.1	Csa1G605110.1
Csa1G605690.1	Csa1G605690.2
Csa1G605710.1	Csa1G605710.2
Csa1G605710.2	Csa1G605710.3
Csa1G605730.1	Csa1G605740.1
Csa1G605740.1	Csa1G605750.1
Csa1G611270.1	Csa1G611280.1
Csa1G611280.1	Csa1G611290.1
Csa1G611290.1	Csa1G611300.1
Csa1G611820.1	Csa1G612320.1
Csa1G612320.1	Csa1G612330.1
Csa1G612850.1	Csa1G612860.1
Csa1G613540.1	Csa1G613540.2
Csa1G613620.1	Csa1G613620.2
Csa1G614140.1	Csa1G614140.2
Csa1G614140.2	Csa1G614640.1
Csa1G615730.1	Csa1G615730.2
Csa1G616230.1	Csa1G616240.1
Csa1G617390.1	Csa1G617890.1
Csa1G618390.1	Csa1G618890.1
Csa1G618890.1	Csa1G619390.1
Csa1G619390.1	Csa1G620390.1
Csa1G627400.1	Csa1G627400.2
Csa1G627440.1	Csa1G627440.2
Csa1G627460.1	Csa1G627470.1
Csa1G629040.1	Csa1G629040.2
Csa1G629120.1	Csa1G629120.2
Csa1G629700.1	Csa1G629710.1
Csa1G629770.1	Csa1G629780.1
Csa1G630840.1	Csa1G630850.1
Csa1G630850.1	Csa1G630860.1
Csa1G630860.1	Csa1G631860.1
Csa1G637960.1	Csa1G637960.2
Csa1G641010.1	Csa1G641010.2
Csa1G651140.1	Csa1G651140.2
Csa1G651680.1	Csa1G651680.2
Csa1G652220.1	Csa1G652230.1
Csa1G654870.1	Csa1G654870.2
Csa1G654890.1	Csa1G654890.2
Csa1G658520.1	Csa1G658520.2
Csa1G660140.2	Csa1G660140.1
Csa1G660150.1	Csa1G660150.2
Csa1G666960.1	Csa1G666960.2
Csa1G666980.1	Csa1G666980.2
Csa1G668000.1	Csa1G668000.2
Csa1G680120.1	Csa1G681120.1
Csa1G681130.1	Csa1G681130.2
Csa1G690140.1	Csa1G690140.2
Csa1G690210.1	Csa1G690210.3
Csa1G690210.4	Csa1G690210.2
Csa1G690210.3	Csa1G690210.4
Csa1G690240.2	Csa1G690240.1
Csa1G690240.1	Csa1G690240.3
Csa1G699610.1	Csa1G699610.2
Csa1G700660.1	Csa1G700670.1
Csa1G700670.1	Csa1G700680.1
Csa1G701390.1	Csa1G701390.2
Csa1G701990.1	Csa1G701990.2
Csa1G703060.1	Csa1G703070.1
Csa1G703570.1	Csa1G703580.1
Csa1G708160.1	Csa1G708160.2
Csa1G708660.1	Csa1G709160.1
Csa1G713670.2	Csa1G713670.1
Csa2G000070.1	Csa2G000070.2
Csa2G000110.1	Csa2G000110.2
Csa2G000370.2	Csa2G000370.1
Csa2G000500.1	Csa2G000500.2
Csa2G000720.1	Csa2G000730.1
Csa2G000730.1	Csa2G000740.1
Csa2G000760.1	Csa2G000770.1
Csa2G000810.1	Csa2G000820.1
Csa2G000830.1	Csa2G000830.2
Csa2G000830.3	Csa2G000830.1
Csa2G000830.4	Csa2G000830.3
Csa2G00090.1	Csa2G00090.2
Csa2G000910.1	Csa2G000910.2
Csa2G000910.2	Csa2G000910.3
Csa2G000920.1	Csa2G000930.1
Csa2G000940.2	Csa2G000940.1
Csa2G000940.1	Csa2G000940.3
Csa2G004700.2	Csa2G004700.1
Csa2G005870.1	Csa2G005870.2
Csa2G006260.1	Csa2G006260.2
Csa2G006870.1	Csa2G006880.1
Csa2G007410.1	Csa2G007410.2
Csa2G007970.1	Csa2G007970.2
Csa2G008000.1	Csa2G008010.1
Csa2G008040.1	Csa2G008040.2
Csa2G008040.2	Csa2G008040.3
Csa2G008040.3	Csa2G008040.4
Csa2G008100.1	Csa2G008100.2
Csa2G008680.1	Csa2G008680.2
Csa2G008750.1	Csa2G008750.2
Csa2G009280.1	Csa2G009280.2
Csa2G009390.1	Csa2G009390.2
Csa2G009440.1	Csa2G009440.2
Csa2G009470.1	Csa2G009470.2
Csa2G009500.1	Csa2G009500.2
Csa2G009600.1	Csa2G009600.2
Csa2G009600.2	Csa2G009600.3
Csa2G009610.1	Csa2G009620.1
Csa2G010150.1	Csa2G010160.1
Csa2G010200.1	Csa2G010210.1
Csa2G010210.1	Csa2G010220.1
Csa2G010270.1	Csa2G010270.2
Csa2G010320.1	Csa2G010320.2
Csa2G010370.1	Csa2G010380.1
Csa2G010380.1	Csa2G010390.1
Csa2G011420.1	Csa2G011420.2
Csa2G011420.2	Csa2G011420.3
Csa2G012110.1	Csa2G012110.2
Csa2G012680.1	Csa2G012680.2
Csa2G012680.3	Csa2G012680.1
Csa2G013300.1	Csa2G013300.2
Csa2G013300.2	Csa2G013300.3
Csa2G013310.1	Csa2G013310.2
Csa2G014830.1	Csa2G015330.1
Csa2G020960.1	Csa2G020970.1
Csa2G020980.1	Csa2G020980.2
Csa2G020990.1	Csa2G020990.2
Csa2G020990.3	Csa2G020990.1
Csa2G021000.1	Csa2G021500.1
Csa2G021510.1	Csa2G021520.1
Csa2G021530.1	Csa2G021540.1
Csa2G021580.1	Csa2G021590.2
Csa2G021590.2	Csa2G021590.1
Csa2G021640.1	Csa2G021650.1
Csa2G021680.1	Csa2G021680.2
Csa2G021730.1	Csa2G021730.2
Csa2G021730.2	Csa2G021730.3
Csa2G022270.1	Csa2G022770.1
Csa2G023340.1	Csa2G023840.1
Csa2G023890.1	Csa2G023900.1
Csa2G030020.2	Csa2G030020.1
Csa2G030060.1	Csa2G030060.2
Csa2G030090.1	Csa2G030590.1
Csa2G031170.2	Csa2G031170.1
Csa2G031170.3	Csa2G031170.2
Csa2G031700.1	Csa2G031700.2
Csa2G031710.1	Csa2G031710.2
Csa2G032230.1	Csa2G032730.1
Csa2G033890.1	Csa2G033890.3
Csa2G033890.3	Csa2G033890.4
Csa2G033930.1	Csa2G033930.2
Csa2G033940.1	Csa2G033940.2
Csa2G034520.1	Csa2G034530.1
Csa2G034560.1	Csa2G034560.2
Csa2G034570.1	Csa2G034570.2
Csa2G034590.1	Csa2G034590.2
Csa2G034680.1	Csa2G034690.1
Csa2G034750.1	Csa2G034750.2
Csa2G034800.1	Csa2G034800.2
Csa2G034800.3	Csa2G034800.1
Csa2G035380.1	Csa2G035380.2
Csa2G035430.1	Csa2G035430.2
Csa2G035430.2	Csa2G035440.1
Csa2G035460.1	Csa2G035470.1
Csa2G035470.1	Csa2G035480.1
Csa2G036080.1	Csa2G036080.2
Csa2G036700.1	Csa2G036700.2
Csa2G047770.1	Csa2G047770.2
Csa2G049920.1	Csa2G049930.1
Csa2G049960.2	Csa2G049960.1
Csa2G050000.1	Csa2G055000.1
Csa2G055000.1	Csa2G055010.1
Csa2G055040.1	Csa2G055050.1
Csa2G058660.1	Csa2G058660.2
Csa2G060530.1	Csa2G060530.2
Csa2G061580.1	Csa2G061580.2
Csa2G062620.2	Csa2G062620.1
Csa2G062620.3	Csa2G062620.2
Csa2G062680.1	Csa2G062680.2
Csa2G068700.1	Csa2G069200.1
Csa2G069200.1	Csa2G069700.1
Csa2G070200.1	Csa2G070210.1
Csa2G070850.1	Csa2G070850.2
Csa2G070880.1	Csa2G070880.2
Csa2G070930.1	Csa2G071930.1
Csa2G071930.1	Csa2G072430.1
Csa2G072450.1	Csa2G072450.2
Csa2G072450.2	Csa2G072450.3
Csa2G073010.2	Csa2G073010.1
Csa2G073020.1	Csa2G073020.2
Csa2G074060.1	Csa2G074060.2
Csa2G074190.1	Csa2G074200.1
Csa2G074210.1	Csa2G074210.2
Csa2G074220.1	Csa2G074220.2
Csa2G075300.1	Csa2G075300.2
Csa2G083700.1	Csa2G083700.2
Csa2G083700.2	Csa2G083710.1
Csa2G083730.2	Csa2G083730.1
Csa2G093820.1	Csa2G093820.2
Csa2G094390.1	Csa2G094400.1
Csa2G101090.1	Csa2G101090.2
Csa2G108610.1	Csa2G108610.2
Csa2G110230.1	Csa2G110230.2
Csa2G129150.1	Csa2G129150.2
Csa2G155600.1	Csa2G155600.2
Csa2G155600.2	Csa2G155600.3
Csa2G165670.1	Csa2G165670.2
Csa2G165670.2	Csa2G165670.3
Csa2G169690.1	Csa2G169690.2
Csa2G169720.1	Csa2G169720.2
Csa2G170810.1	Csa2G170810.2
Csa2G170820.1	Csa2G170820.2
Csa2G171850.1	Csa2G171850.2
Csa2G171930.1	Csa2G171930.2
Csa2G171940.1	Csa2G171950.1
Csa2G171950.1	Csa2G171960.1
Csa2G172520.2	Csa2G172520.1
Csa2G173070.1	Csa2G173070.2
Csa2G173580.1	Csa2G173580.3
Csa2G173580.3	Csa2G173580.2
Csa2G176190.1	Csa2G176690.1
Csa2G185730.1	Csa2G185730.2
Csa2G185730.2	Csa2G190730.1
Csa2G190750.1	Csa2G190750.2
Csa2G190800.1	Csa2G190800.2
Csa2G193340.1	Csa2G193350.1
Csa2G193360.1	Csa2G193370.1
Csa2G196890.1	Csa2G196900.1
Csa2G196900.1	Csa2G199900.1
Csa2G200440.1	Csa2G200440.2
Csa2G222020.1	Csa2G222030.1
Csa2G222060.1	Csa2G222060.2
Csa2G222100.1	Csa2G222100.2
Csa2G223750.1	Csa2G223750.2
Csa2G224300.1	Csa2G224300.2
Csa2G225310.1	Csa2G225310.2
Csa2G225330.1	Csa2G225330.2
Csa2G234510.1	Csa2G234520.1
Csa2G234520.1	Csa2G234530.1
Csa2G235610.1	Csa2G235610.2
Csa2G236630.1	Csa2G236630.2
Csa2G237690.1	Csa2G237700.1
Csa2G238800.1	Csa2G238800.2
Csa2G239400.1	Csa2G239400.2
Csa2G245470.1	Csa2G245480.1
Csa2G246530.1	Csa2G246530.2
Csa2G248120.1	Csa2G248130.1
Csa2G248750.1	Csa2G248760.1
Csa2G249790.1	Csa2G249790.2
Csa2G249890.1	Csa2G249890.2
Csa2G249910.1	Csa2G249920.1
Csa2G250950.1	Csa2G250960.1
Csa2G250960.1	Csa2G250960.2
Csa2G251460.1	Csa2G251460.2
Csa2G251460.2	Csa2G251460.3
Csa2G251490.1	Csa2G251490.2
Csa2G252020.1	Csa2G252020.2
Csa2G252030.1	Csa2G252030.2
Csa2G258680.1	Csa2G258680.2
Csa2G258760.1	Csa2G258770.1
Csa2G258810.1	Csa2G258820.1
Csa2G258820.1	Csa2G258830.1
Csa2G263950.2	Csa2G263950.1
Csa2G264010.1	Csa2G264020.1
Csa2G264050.1	Csa2G264060.1
Csa2G270780.1	Csa2G270780.2
Csa2G270780.2	Csa2G270780.3
Csa2G270780.3	Csa2G270780.4
Csa2G270830.2	Csa2G270830.1
Csa2G271380.1	Csa2G271380.2
Csa2G271380.2	Csa2G271380.3
Csa2G271480.1	Csa2G271480.2
Csa2G277030.1	Csa2G277030.2
Csa2G277600.1	Csa2G277600.2
Csa2G285290.1	Csa2G285300.1
Csa2G285380.2	Csa2G285380.1
Csa2G286460.1	Csa2G286460.2
Csa2G286500.2	Csa2G286500.1
Csa2G286500.3	Csa2G286500.2
Csa2G287140.1	Csa2G287150.1
Csa2G292210.1	Csa2G292210.2
Csa2G292230.1	Csa2G292240.1
Csa2G292810.1	Csa2G292810.2
Csa2G292840.1	Csa2G292850.1
Csa2G292850.1	Csa2G293350.1
Csa2G293360.1	Csa2G293860.1
Csa2G294870.1	Csa2G294880.1
Csa2G294880.1	Csa2G294890.1
Csa2G294890.1	Csa2G294900.1
Csa2G294900.1	Csa2G294910.1
Csa2G295970.1	Csa2G295970.2
Csa2G296060.1	Csa2G296060.2
Csa2G296090.1	Csa2G296090.2
Csa2G296100.1	Csa2G296110.1
Csa2G296110.1	Csa2G296120.1
Csa2G296130.1	Csa2G296130.2
Csa2G297180.1	Csa2G297180.2
Csa2G297190.1	Csa2G297190.2
Csa2G297210.1	Csa2G297210.2
Csa2G298260.2	Csa2G298260.1
Csa2G298300.1	Csa2G298310.1
Csa2G298320.1	Csa2G298330.1
Csa2G298330.1	Csa2G299330.1
Csa2G299360.1	Csa2G299360.2
Csa2G299910.1	Csa2G299920.1
Csa2G299950.1	Csa2G300950.1
Csa2G301450.1	Csa2G301460.1
Csa2G302130.1	Csa2G302140.1
Csa2G302150.1	Csa2G302150.2
Csa2G308370.1	Csa2G308370.2
Csa2G336650.1	Csa2G336660.1
Csa2G336710.1	Csa2G336710.2
Csa2G336730.1	Csa2G336730.2
Csa2G338820.1	Csa2G338820.2
Csa2G338880.1	Csa2G338880.2
Csa2G345940.1	Csa2G345940.2
Csa2G345940.2	Csa2G345940.3
Csa2G347100.1	Csa2G347110.1
Csa2G347110.1	Csa2G347120.1
Csa2G348850.1	Csa2G348850.2
Csa2G348880.1	Csa2G348880.2
Csa2G348890.1	Csa2G348890.3
Csa2G348890.4	Csa2G348890.2
Csa2G348890.3	Csa2G348890.4
Csa2G348940.1	Csa2G348940.2
Csa2G348960.1	Csa2G348970.1
Csa2G348990.1	Csa2G348990.2
Csa2G349590.1	Csa2G349590.2
Csa2G349650.1	Csa2G349650.2
Csa2G349650.2	Csa2G349650.3
Csa2G350220.1	Csa2G350220.2
Csa2G350330.1	Csa2G350340.1
Csa2G351010.1	Csa2G351010.2
Csa2G351580.1	Csa2G351580.2
Csa2G351670.1	Csa2G351670.2
Csa2G351710.1	Csa2G351710.2
Csa2G352930.1	Csa2G352930.2
Csa2G352960.1	Csa2G352960.2
Csa2G352960.2	Csa2G352960.3
Csa2G354030.1	Csa2G354030.2
Csa2G354620.1	Csa2G354620.2
Csa2G354630.2	Csa2G354630.1
Csa2G354640.1	Csa2G354640.2
Csa2G354640.2	Csa2G354640.3
Csa2G354680.1	Csa2G354680.2
Csa2G354680.2	Csa2G354680.3
Csa2G354690.1	Csa2G354690.2
Csa2G354690.2	Csa2G354690.3
Csa2G354800.1	Csa2G354800.2
Csa2G354850.1	Csa2G354850.2
Csa2G354930.1	Csa2G354940.1
Csa2G354940.1	Csa2G354950.1
Csa2G354950.1	Csa2G354960.1
Csa2G354980.1	Csa2G354980.2
Csa2G354980.2	Csa2G354980.3
Csa2G355040.1	Csa2G356040.1
Csa2G356040.1	Csa2G356050.1
Csa2G356610.1	Csa2G356610.2
Csa2G356660.1	Csa2G356660.2
Csa2G357240.1	Csa2G357250.1
Csa2G357250.1	Csa2G357260.1
Csa2G357340.1	Csa2G357350.1
Csa2G357350.1	Csa2G357850.1
Csa2G358860.1	Csa2G358870.1
Csa2G358870.1	Csa2G358880.1
Csa2G359900.1	Csa2G359910.1
Csa2G359930.1	Csa2G359940.1
Csa2G360050.1	Csa2G360050.2
Csa2G360560.1	Csa2G360570.1
Csa2G360670.1	Csa2G360680.1
Csa2G360680.1	Csa2G360690.1
Csa2G360820.1	Csa2G360820.2
Csa2G361470.2	Csa2G361470.1
Csa2G361480.1	Csa2G361480.2
Csa2G361480.2	Csa2G361480.3
Csa2G361580.1	Csa2G361580.2
Csa2G361620.1	Csa2G361620.2
Csa2G361720.1	Csa2G361720.2
Csa2G362420.1	Csa2G362430.1
Csa2G362440.1	Csa2G362440.2
Csa2G362440.2	Csa2G362440.3
Csa2G362490.1	Csa2G362500.1
Csa2G362500.1	Csa2G362500.2
Csa2G365140.1	Csa2G365140.2
Csa2G365640.1	Csa2G365650.1
Csa2G366700.1	Csa2G366700.2
Csa2G366700.2	Csa2G366700.3
Csa2G367210.1	Csa2G367210.2
Csa2G367220.1	Csa2G367220.2
Csa2G368790.1	Csa2G368790.2
Csa2G368810.1	Csa2G368820.1
Csa2G368840.1	Csa2G368840.2
Csa2G368850.1	Csa2G368860.1
Csa2G369040.1	Csa2G369040.2
Csa2G369070.1	Csa2G369070.2
Csa2G369230.1	Csa2G369230.2
Csa2G369730.1	Csa2G369740.1
Csa2G369750.1	Csa2G369750.2
Csa2G369760.2	Csa2G369760.1
Csa2G369780.1	Csa2G369790.1
Csa2G369790.1	Csa2G369800.1
Csa2G370420.1	Csa2G370420.2
Csa2G370420.2	Csa2G370430.1
Csa2G370440.1	Csa2G370440.2
Csa2G371090.1	Csa2G371090.2
Csa2G371110.1	Csa2G371610.1
Csa2G371610.1	Csa2G371610.2
Csa2G372130.2	Csa2G372130.1
Csa2G372800.2	Csa2G372800.1
Csa2G372830.2	Csa2G372830.1
Csa2G373430.1	Csa2G373430.2
Csa2G373480.1	Csa2G373490.1
Csa2G373490.1	Csa2G373500.1
Csa2G373550.1	Csa2G373550.2
Csa2G374640.1	Csa2G374650.1
Csa2G374650.1	Csa2G374660.1
Csa2G375760.1	Csa2G375760.2
Csa2G375780.1	Csa2G375780.2
Csa2G375780.2	Csa2G375780.3
Csa2G376290.1	Csa2G376290.2
Csa2G377350.1	Csa2G377350.2
Csa2G377990.2	Csa2G377990.1
Csa2G378520.1	Csa2G378520.2
Csa2G378570.1	Csa2G378570.2
Csa2G378580.1	Csa2G378580.2
Csa2G378580.2	Csa2G378580.3
Csa2G379160.1	Csa2G379160.2
Csa2G379250.1	Csa2G379250.2
Csa2G379290.1	Csa2G379290.2
Csa2G379290.2	Csa2G379290.3
Csa2G379300.1	Csa2G379310.1
Csa2G379340.1	Csa2G379340.2
Csa2G379880.1	Csa2G379890.1
Csa2G379890.1	Csa2G379900.1
Csa2G379980.2	Csa2G379980.1
Csa2G380020.1	Csa2G380020.2
Csa2G380020.2	Csa2G380020.4
Csa2G380020.4	Csa2G380020.3
Csa2G380030.1	Csa2G380030.3
Csa2G380030.3	Csa2G380030.2
Csa2G380070.1	Csa2G380080.1
Csa2G380630.1	Csa2G381630.1
Csa2G381640.1	Csa2G381640.2
Csa2G381650.1	Csa2G381650.2
Csa2G381780.1	Csa2G381780.2
Csa2G381780.2	Csa2G381780.3
Csa2G382400.1	Csa2G382400.2
Csa2G382440.1	Csa2G382450.1
Csa2G382540.1	Csa2G382550.1
Csa2G382650.1	Csa2G382660.1
Csa2G382720.1	Csa2G382720.2
Csa2G382720.2	Csa2G382720.3
Csa2G382750.1	Csa2G382760.1
Csa2G382790.1	Csa2G382790.2
Csa2G383350.1	Csa2G383350.2
Csa2G383370.1	Csa2G383380.1
Csa2G383900.1	Csa2G383910.1
Csa2G384970.1	Csa2G384970.2
Csa2G386120.1	Csa2G386120.2
Csa2G401350.1	Csa2G401350.2
Csa2G401390.1	Csa2G401390.3
Csa2G401390.3	Csa2G401390.2
Csa2G401490.1	Csa2G401990.1
Csa2G402090.1	Csa2G402090.2
Csa2G403700.1	Csa2G403700.2
Csa2G404830.1	Csa2G404830.2
Csa2G404930.1	Csa2G404930.2
Csa2G406080.1	Csa2G406090.1
Csa2G406630.1	Csa2G406640.1
Csa2G406640.1	Csa2G406650.1
Csa2G406660.1	Csa2G406660.2
Csa2G406670.1	Csa2G406670.2
Csa2G406730.1	Csa2G406730.2
Csa2G406800.1	Csa2G406800.2
Csa2G408410.1	Csa2G408410.2
Csa2G408410.3	Csa2G408410.1
Csa2G408410.2	Csa2G408410.4
Csa2G408410.4	Csa2G408420.1
Csa2G416110.1	Csa2G416110.2
Csa2G416170.1	Csa2G416170.2
Csa2G416190.1	Csa2G416200.1
Csa2G416230.1	Csa2G416240.1
Csa2G416240.1	Csa2G416240.2
Csa2G416240.2	Csa2G416250.1
Csa2G416250.1	Csa2G416260.1
Csa2G418930.1	Csa2G418940.1
Csa2G419960.1	Csa2G419960.2
Csa2G420480.1	Csa2G420980.1
Csa2G423640.1	Csa2G423650.1
Csa2G425740.1	Csa2G425750.1
Csa2G425780.1	Csa2G425790.1
Csa2G428970.1	Csa2G428970.2
Csa2G428970.2	Csa2G428970.3
Csa2G428970.3	Csa2G428970.4
Csa2G429030.1	Csa2G429040.1
Csa2G429040.1	Csa2G429050.1
Csa2G429070.1	Csa2G430570.1
Csa2G430570.1	Csa2G431070.1
Csa2G431090.1	Csa2G431090.2
Csa2G431150.1	Csa2G431150.2
Csa2G433910.1	Csa2G433920.1
Csa2G435510.1	Csa2G435520.1
Csa2G435520.1	Csa2G435530.1
Csa2G435530.1	Csa2G435540.1
Csa2G435540.1	Csa2G436040.1
Csa2G436040.1	Csa2G437040.1
Csa2G437100.2	Csa2G437100.1
Csa2G437130.1	Csa2G437140.1
Csa2G437140.1	Csa2G439140.1
Csa2G439170.1	Csa2G439180.1
Csa2G439210.1	Csa2G439220.1
Csa2G439240.1	Csa2G439740.1
Csa2G441750.1	Csa2G441750.2
Csa3G000060.2	Csa3G000060.1
Csa3G000070.1	Csa3G000070.2
Csa3G000070.2	Csa3G000070.3
Csa3G000170.1	Csa3G000180.1
Csa3G000720.2	Csa3G000720.1
Csa3G002300.1	Csa3G002300.2
Csa3G002300.3	Csa3G002300.1
Csa3G002330.1	Csa3G002330.2
Csa3G002380.1	Csa3G002380.2
Csa3G002490.1	Csa3G002490.2
Csa3G002510.1	Csa3G002510.2
Csa3G002560.2	Csa3G002560.1
Csa3G002650.1	Csa3G002650.2
Csa3G002660.1	Csa3G002660.2
Csa3G002710.1	Csa3G002710.2
Csa3G003990.1	Csa3G004490.1
Csa3G004520.1	Csa3G004530.1
Csa3G006600.1	Csa3G006600.2
Csa3G006600.4	Csa3G006600.1
Csa3G006600.2	Csa3G006600.3
Csa3G006620.1	Csa3G006620.2
Csa3G006710.2	Csa3G006710.1
Csa3G006730.1	Csa3G006730.2
Csa3G008280.1	Csa3G008280.2
Csa3G009440.1	Csa3G009440.2
Csa3G009440.2	Csa3G009440.3
Csa3G009550.1	Csa3G010050.1
Csa3G010050.1	Csa3G010060.1
Csa3G010060.1	Csa3G011060.1
Csa3G011660.3	Csa3G011660.1
Csa3G011660.2	Csa3G011660.3
Csa3G011700.1	Csa3G011710.1
Csa3G011720.1	Csa3G011720.2
Csa3G011850.1	Csa3G011860.1
Csa3G012860.1	Csa3G013360.1
Csa3G013360.1	Csa3G014360.1
Csa3G014360.1	Csa3G015360.1
Csa3G015890.1	Csa3G015890.2
Csa3G015890.2	Csa3G015890.3
Csa3G016920.1	Csa3G016930.1
Csa3G017030.1	Csa3G017030.2
Csa3G017140.1	Csa3G017140.2
Csa3G017200.1	Csa3G017200.2
Csa3G017260.1	Csa3G017260.2
Csa3G017290.1	Csa3G017290.2
Csa3G017310.1	Csa3G017310.2
Csa3G017320.1	Csa3G018320.1
Csa3G020050.1	Csa3G020050.2
Csa3G020080.1	Csa3G020090.1
Csa3G021150.1	Csa3G026150.1
Csa3G026690.1	Csa3G027190.1
Csa3G027190.1	Csa3G027200.1
Csa3G027730.1	Csa3G027730.2
Csa3G033750.1	Csa3G033760.1
Csa3G033760.1	Csa3G033770.1
Csa3G033770.1	Csa3G033780.1
Csa3G033810.1	Csa3G033810.2
Csa3G036420.1	Csa3G036420.2
Csa3G036550.1	Csa3G036550.2
Csa3G038160.1	Csa3G038160.2
Csa3G038200.1	Csa3G038200.2
Csa3G038730.1	Csa3G038730.2
Csa3G038790.1	Csa3G038790.2
Csa3G039330.1	Csa3G039330.2
Csa3G039340.2	Csa3G039340.1
Csa3G039850.1	Csa3G040850.1
Csa3G043940.1	Csa3G043950.1
Csa3G043950.1	Csa3G043960.1
Csa3G044490.1	Csa3G044490.2
Csa3G044520.1	Csa3G044520.2
Csa3G044520.2	Csa3G044520.3
Csa3G044520.3	Csa3G044520.4
Csa3G045060.1	Csa3G045070.1
Csa3G045080.1	Csa3G045090.1
Csa3G045090.1	Csa3G045100.1
Csa3G045110.1	Csa3G045120.1
Csa3G046220.1	Csa3G046230.1
Csa3G046230.1	Csa3G047730.1
Csa3G047730.1	Csa3G047740.1
Csa3G047790.1	Csa3G047790.2
Csa3G047860.1	Csa3G047860.2
Csa3G047860.3	Csa3G047860.1
Csa3G047890.2	Csa3G047890.1
Csa3G047900.1	Csa3G047900.2
Csa3G047920.2	Csa3G047920.1
Csa3G048940.1	Csa3G049440.1
Csa3G049440.1	Csa3G055940.1
Csa3G060990.1	Csa3G060990.2
Csa3G061020.1	Csa3G061020.2
Csa3G061550.2	Csa3G061550.1
Csa3G063610.1	Csa3G063620.1
Csa3G063650.1	Csa3G063660.1
Csa3G064190.1	Csa3G064190.2
Csa3G067750.1	Csa3G067760.1
Csa3G073820.1	Csa3G073820.2
Csa3G076560.1	Csa3G076570.1
Csa3G076580.1	Csa3G077580.1
Csa3G079320.1	Csa3G079330.1
Csa3G081350.1	Csa3G081350.2
Csa3G081360.1	Csa3G081360.2
Csa3G096040.1	Csa3G097040.1
Csa3G097040.1	Csa3G097540.1
Csa3G098540.2	Csa3G098540.1
Csa3G099570.1	Csa3G099580.1
Csa3G099640.1	Csa3G099640.2
Csa3G099670.1	Csa3G099670.2
Csa3G099670.2	Csa3G099670.3
Csa3G099700.1	Csa3G099700.2
Csa3G099750.1	Csa3G099750.2
Csa3G099760.1	Csa3G099770.1
Csa3G101820.1	Csa3G102320.1
Csa3G104920.1	Csa3G104920.2
Csa3G104940.1	Csa3G104950.1
Csa3G106000.1	Csa3G106010.1
Csa3G110620.1	Csa3G110630.1
Csa3G110630.1	Csa3G110630.2
Csa3G112770.1	Csa3G112780.1
Csa3G113930.1	Csa3G113930.2
Csa3G115030.2	Csa3G115030.1
Csa3G115030.3	Csa3G115030.2
Csa3G115620.1	Csa3G115620.2
Csa3G116620.1	Csa3G116620.2
Csa3G116620.2	Csa3G116620.3
Csa3G116710.1	Csa3G116710.2
Csa3G116720.1	Csa3G116730.1
Csa3G116810.1	Csa3G116810.2
Csa3G116860.1	Csa3G116860.2
Csa3G117400.1	Csa3G117410.1
Csa3G117980.1	Csa3G117980.2
Csa3G117990.1	Csa3G117990.3
Csa3G117990.3	Csa3G117990.2
Csa3G118040.1	Csa3G118050.1
Csa3G118060.1	Csa3G118060.2
Csa3G118190.1	Csa3G118190.2
Csa3G119280.1	Csa3G119290.1
Csa3G119290.1	Csa3G119300.1
Csa3G119300.1	Csa3G119310.1
Csa3G119390.1	Csa3G119400.1
Csa3G119420.1	Csa3G119420.2
Csa3G119480.1	Csa3G119480.2
Csa3G119630.1	Csa3G119640.1
Csa3G119690.1	Csa3G119690.2
Csa3G119710.1	Csa3G119720.1
Csa3G119720.1	Csa3G119730.1
Csa3G119760.1	Csa3G119760.2
Csa3G119810.1	Csa3G119810.2
Csa3G119810.2	Csa3G119810.3
Csa3G119810.3	Csa3G119810.4
Csa3G119850.1	Csa3G119850.2
Csa3G119860.1	Csa3G119860.2
Csa3G120400.3	Csa3G120400.1
Csa3G120400.2	Csa3G120400.3
Csa3G121590.1	Csa3G121590.2
Csa3G121640.1	Csa3G121640.2
Csa3G121710.1	Csa3G121710.3
Csa3G121710.3	Csa3G121710.2
Csa3G121720.1	Csa3G121720.2
Csa3G121780.1	Csa3G121780.2
Csa3G121780.2	Csa3G121780.3
Csa3G122470.1	Csa3G122470.2
Csa3G122650.1	Csa3G122650.2
Csa3G123170.1	Csa3G123180.1
Csa3G124240.1	Csa3G124240.2
Csa3G124900.1	Csa3G124910.1
Csa3G124910.1	Csa3G124920.1
Csa3G124960.1	Csa3G124960.2
Csa3G124970.1	Csa3G124970.2
Csa3G124980.1	Csa3G124980.2
Csa3G124990.1	Csa3G124990.2
Csa3G124990.3	Csa3G124990.1
Csa3G125020.1	Csa3G125020.2
Csa3G126080.1	Csa3G126080.2
Csa3G126250.1	Csa3G126250.2
Csa3G126760.1	Csa3G126760.2
Csa3G126760.2	Csa3G126760.3
Csa3G126770.1	Csa3G126770.2
Csa3G126890.2	Csa3G126890.1
Csa3G126890.1	Csa3G126890.3
Csa3G126960.1	Csa3G126970.1
Csa3G126980.2	Csa3G126980.1
Csa3G126990.1	Csa3G126990.2
Csa3G127140.2	Csa3G127140.1
Csa3G127140.1	Csa3G127140.3
Csa3G127220.1	Csa3G127230.1
Csa3G127750.1	Csa3G127750.2
Csa3G127750.2	Csa3G127760.1
Csa3G127760.1	Csa3G127770.1
Csa3G128840.1	Csa3G128850.1
Csa3G128850.1	Csa3G128860.1
Csa3G129480.1	Csa3G129480.2
Csa3G129490.1	Csa3G129490.2
Csa3G129490.4	Csa3G129490.1
Csa3G129490.2	Csa3G129490.3
Csa3G129690.1	Csa3G129690.2
Csa3G130280.1	Csa3G130280.2
Csa3G130850.1	Csa3G130850.2
Csa3G130890.1	Csa3G130890.2
Csa3G131990.1	Csa3G131990.2
Csa3G132000.1	Csa3G132000.2
Csa3G132010.1	Csa3G132010.2
Csa3G132010.2	Csa3G132010.3
Csa3G132020.1	Csa3G132520.1
Csa3G132520.1	Csa3G132530.1
Csa3G132580.1	Csa3G132580.2
Csa3G133180.1	Csa3G133180.3
Csa3G133180.3	Csa3G133180.2
Csa3G133300.1	Csa3G133300.2
Csa3G133330.3	Csa3G133330.1
Csa3G133330.2	Csa3G133330.3
Csa3G133370.1	Csa3G133380.1
Csa3G133380.1	Csa3G133880.1
Csa3G133880.1	Csa3G133890.1
Csa3G134550.1	Csa3G134550.2
Csa3G134670.1	Csa3G134670.2
Csa3G134670.2	Csa3G134670.3
Csa3G134690.1	Csa3G134690.2
Csa3G134690.2	Csa3G134690.3
Csa3G134720.1	Csa3G134720.2
Csa3G134750.1	Csa3G134760.1
Csa3G134760.1	Csa3G134770.1
Csa3G134770.1	Csa3G134780.1
Csa3G134820.1	Csa3G134820.2
Csa3G134820.2	Csa3G134820.3
Csa3G134840.1	Csa3G134840.2
Csa3G134900.1	Csa3G134900.2
Csa3G134920.1	Csa3G134930.1
Csa3G134960.1	Csa3G134960.2
Csa3G134960.2	Csa3G134960.3
Csa3G134990.1	Csa3G134990.2
Csa3G135010.1	Csa3G135010.2
Csa3G135620.1	Csa3G135630.1
Csa3G135680.1	Csa3G135690.1
Csa3G135690.1	Csa3G135700.1
Csa3G135700.1	Csa3G135710.1
Csa3G135720.1	Csa3G135730.1
Csa3G135730.1	Csa3G135740.1
Csa3G135740.1	Csa3G135750.1
Csa3G141770.1	Csa3G141780.1
Csa3G141780.1	Csa3G141790.1
Csa3G141900.1	Csa3G142400.1
Csa3G142400.1	Csa3G142410.1
Csa3G142410.1	Csa3G142910.1
Csa3G142950.1	Csa3G142960.1
Csa3G142960.1	Csa3G142970.1
Csa3G143500.1	Csa3G143500.2
Csa3G143520.1	Csa3G143520.2
Csa3G143540.2	Csa3G143540.1
Csa3G143570.1	Csa3G143570.2
Csa3G143600.1	Csa3G143600.2
Csa3G143610.1	Csa3G143610.2
Csa3G144220.1	Csa3G144220.2
Csa3G145760.2	Csa3G145760.1
Csa3G145760.1	Csa3G145760.3
Csa3G146320.1	Csa3G146320.2
Csa3G146380.1	Csa3G146380.2
Csa3G146410.3	Csa3G146410.1
Csa3G146410.2	Csa3G146410.3
Csa3G146430.1	Csa3G146430.2
Csa3G146430.2	Csa3G146430.3
Csa3G146480.1	Csa3G146490.1
Csa3G146510.1	Csa3G146520.1
Csa3G146600.1	Csa3G146600.2
Csa3G146600.2	Csa3G146600.3
Csa3G146640.1	Csa3G146640.2
Csa3G148790.1	Csa3G148800.1
Csa3G148800.1	Csa3G149300.1
Csa3G149300.1	Csa3G149310.1
Csa3G149320.2	Csa3G149320.1
Csa3G149950.1	Csa3G149950.2
Csa3G149980.1	Csa3G149990.1
Csa3G149990.1	Csa3G150000.1
Csa3G150120.1	Csa3G150120.2
Csa3G150130.1	Csa3G150140.1
Csa3G150780.1	Csa3G150790.1
Csa3G150790.1	Csa3G150800.1
Csa3G151370.1	Csa3G151380.1
Csa3G151420.1	Csa3G151420.2
Csa3G151470.1	Csa3G151470.2
Csa3G151480.1	Csa3G151490.1
Csa3G151490.1	Csa3G151500.1
Csa3G151540.1	Csa3G151540.2
Csa3G152050.2	Csa3G152050.1
Csa3G152080.1	Csa3G152090.1
Csa3G152100.1	Csa3G152100.2
Csa3G153740.1	Csa3G153740.2
Csa3G154280.1	Csa3G154280.2
Csa3G154390.1	Csa3G154390.2
Csa3G154410.1	Csa3G159410.1
Csa3G159410.1	Csa3G159420.1
Csa3G164530.1	Csa3G164540.1
Csa3G164550.1	Csa3G164560.1
Csa3G166200.1	Csa3G166200.2
Csa3G168950.1	Csa3G168950.2
Csa3G171150.1	Csa3G171150.2
Csa3G171200.1	Csa3G171200.2
Csa3G171200.2	Csa3G171200.3
Csa3G171760.1	Csa3G171770.1
Csa3G171830.1	Csa3G171830.2
Csa3G171840.1	Csa3G171850.1
Csa3G171860.1	Csa3G171870.1
Csa3G171870.1	Csa3G172370.1
Csa3G172380.1	Csa3G172380.2
Csa3G172980.1	Csa3G172980.2
Csa3G174540.2	Csa3G174540.1
Csa3G174580.1	Csa3G175080.1
Csa3G175590.1	Csa3G175600.1
Csa3G175610.1	Csa3G175620.1
Csa3G176250.1	Csa3G176260.1
Csa3G176280.1	Csa3G176280.2
Csa3G176300.1	Csa3G176300.2
Csa3G177400.1	Csa3G177900.1
Csa3G177960.1	Csa3G177970.1
Csa3G177970.1	Csa3G177980.1
Csa3G177990.1	Csa3G177990.2
Csa3G178490.1	Csa3G178500.1
Csa3G178500.1	Csa3G178510.1
Csa3G178560.1	Csa3G178560.2
Csa3G178570.1	Csa3G178580.1
Csa3G180210.1	Csa3G180220.1
Csa3G180330.1	Csa3G180330.2
Csa3G180340.1	Csa3G180340.2
Csa3G180340.2	Csa3G180340.3
Csa3G180400.1	Csa3G180400.2
Csa3G180410.1	Csa3G180410.2
Csa3G180410.2	Csa3G180410.3
Csa3G180430.2	Csa3G180430.1
Csa3G181980.1	Csa3G181980.2
Csa3G182020.1	Csa3G182030.1
Csa3G182050.1	Csa3G182060.1
Csa3G182070.1	Csa3G182070.2
Csa3G182080.1	Csa3G182090.1
Csa3G182140.1	Csa3G182150.1
Csa3G183910.1	Csa3G183910.2
Csa3G183920.1	Csa3G183920.2
Csa3G183960.1	Csa3G183960.2
Csa3G183960.2	Csa3G183960.3
Csa3G183980.1	Csa3G183980.2
Csa3G184080.1	Csa3G184080.2
Csa3G185160.1	Csa3G185160.2
Csa3G185160.2	Csa3G185160.3
Csa3G185670.1	Csa3G186170.1
Csa3G186720.1	Csa3G186720.2
Csa3G186720.2	Csa3G186720.3
Csa3G187250.1	Csa3G187250.2
Csa3G188340.1	Csa3G188350.1
Csa3G194410.1	Csa3G194410.2
Csa3G198460.1	Csa3G198460.2
Csa3G198470.1	Csa3G198470.2
Csa3G198470.2	Csa3G198470.3
Csa3G198490.1	Csa3G198490.2
Csa3G199610.1	Csa3G199610.2
Csa3G202740.1	Csa3G202740.2
Csa3G207360.1	Csa3G207360.2
Csa3G207900.1	Csa3G207900.2
Csa3G207950.1	Csa3G207950.2
Csa3G209450.1	Csa3G209450.2
Csa3G209450.2	Csa3G209450.3
Csa3G214570.1	Csa3G214570.2
Csa3G214580.1	Csa3G214590.1
Csa3G214590.1	Csa3G215590.1
Csa3G215610.1	Csa3G215610.2
Csa3G218160.1	Csa3G218170.1
Csa3G221730.1	Csa3G221730.2
Csa3G222790.1	Csa3G222800.1
Csa3G225330.1	Csa3G225330.2
Csa3G225840.1	Csa3G225840.2
Csa3G232960.1	Csa3G232960.2
Csa3G238100.2	Csa3G238100.1
Csa3G238130.1	Csa3G238130.2
Csa3G238740.1	Csa3G238740.2
Csa3G239280.1	Csa3G239280.2
Csa3G239290.1	Csa3G239290.2
Csa3G239840.2	Csa3G239840.1
Csa3G239840.1	Csa3G239850.1
Csa3G253500.1	Csa3G253500.2
Csa3G257070.1	Csa3G257070.2
Csa3G257070.2	Csa3G257070.4
Csa3G257070.4	Csa3G257070.3
Csa3G270800.2	Csa3G270800.1
Csa3G280930.1	Csa3G280930.2
Csa3G280950.1	Csa3G280950.2
Csa3G298070.1	Csa3G298570.1
Csa3G298570.1	Csa3G298580.1
Csa3G304140.1	Csa3G304140.2
Csa3G331330.1	Csa3G331340.1
Csa3G340350.1	Csa3G342350.1
Csa3G346910.1	Csa3G346920.1
Csa3G355560.1	Csa3G355570.1
Csa3G355570.1	Csa3G355580.1
Csa3G374210.1	Csa3G374210.2
Csa3G374210.2	Csa3G374210.3
Csa3G375730.1	Csa3G375730.2
Csa3G386310.1	Csa3G386810.1
Csa3G386810.1	Csa3G386820.1
Csa3G389830.1	Csa3G389830.2
Csa3G391380.1	Csa3G391380.2
Csa3G396920.1	Csa3G398920.1
Csa3G398930.1	Csa3G398930.2
Csa3G402460.1	Csa3G402460.2
Csa3G403990.1	Csa3G404000.1
Csa3G416640.1	Csa3G416650.1
Csa3G426330.2	Csa3G426330.1
Csa3G426340.1	Csa3G426340.2
Csa3G434960.1	Csa3G434960.2
Csa3G434970.1	Csa3G434970.2
Csa3G435010.1	Csa3G435010.3
Csa3G435010.3	Csa3G435010.2
Csa3G435540.1	Csa3G435540.2
Csa3G435550.1	Csa3G435550.2
Csa3G464690.1	Csa3G464700.1
Csa3G477700.1	Csa3G477700.2
Csa3G481220.1	Csa3G481230.1
Csa3G490860.1	Csa3G490860.2
Csa3G513980.1	Csa3G513980.2
Csa3G513980.2	Csa3G513980.3
Csa3G516530.1	Csa3G516540.1
Csa3G535630.2	Csa3G535630.1
Csa3G560240.1	Csa3G560240.2
Csa3G563280.2	Csa3G563280.1
Csa3G563310.1	Csa3G564310.1
Csa3G576330.1	Csa3G576330.2
Csa3G576340.1	Csa3G576340.3
Csa3G576340.3	Csa3G576340.2
Csa3G585350.1	Csa3G585350.2
Csa3G585900.1	Csa3G585900.2
Csa3G589550.1	Csa3G589550.2
Csa3G592670.1	Csa3G592680.1
Csa3G595220.1	Csa3G595220.2
Csa3G595230.2	Csa3G595230.1
Csa3G603040.1	Csa3G603040.2
Csa3G603590.1	Csa3G603600.1
Csa3G607120.1	Csa3G607130.1
Csa3G608160.1	Csa3G608160.2
Csa3G608180.1	Csa3G608180.2
Csa3G609270.1	Csa3G609270.2
Csa3G609270.2	Csa3G609270.3
Csa3G611390.1	Csa3G611390.2
Csa3G622430.1	Csa3G622430.2
Csa3G624050.1	Csa3G624050.2
Csa3G624050.2	Csa3G624050.3
Csa3G624050.3	Csa3G624050.4
Csa3G624070.1	Csa3G624070.2
Csa3G625100.1	Csa3G625100.2
Csa3G627670.1	Csa3G627670.2
Csa3G627710.1	Csa3G627710.2
Csa3G627720.1	Csa3G627720.2
Csa3G628230.1	Csa3G628230.2
Csa3G633280.1	Csa3G633280.2
Csa3G633280.2	Csa3G633280.3
Csa3G634330.1	Csa3G634340.1
Csa3G635870.1	Csa3G636370.1
Csa3G636420.1	Csa3G636420.2
Csa3G636440.1	Csa3G636440.2
Csa3G636940.1	Csa3G636940.2
Csa3G636940.2	Csa3G636940.3
Csa3G636940.3	Csa3G636940.4
Csa3G636970.1	Csa3G636970.2
Csa3G636980.1	Csa3G636990.1
Csa3G638510.1	Csa3G638510.2
Csa3G640570.1	Csa3G640570.2
Csa3G640630.1	Csa3G640630.2
Csa3G642730.1	Csa3G642740.1
Csa3G645970.1	Csa3G645980.1
Csa3G645980.1	Csa3G645990.1
Csa3G645990.1	Csa3G645990.2
Csa3G646530.1	Csa3G646540.1
Csa3G646540.1	Csa3G646550.1
Csa3G646560.1	Csa3G646560.2
Csa3G651710.1	Csa3G651710.2
Csa3G651750.1	Csa3G651760.1
Csa3G651860.1	Csa3G651860.2
Csa3G653380.1	Csa3G653380.2
Csa3G668600.1	Csa3G669600.1
Csa3G681150.1	Csa3G681160.1
Csa3G684670.1	Csa3G684680.1
Csa3G684680.1	Csa3G684690.1
Csa3G689270.1	Csa3G689270.2
Csa3G689270.2	Csa3G689280.1
Csa3G689790.1	Csa3G689790.2
Csa3G690820.1	Csa3G690820.2
Csa3G698480.1	Csa3G698490.1
Csa3G698490.1	Csa3G698500.1
Csa3G698560.1	Csa3G698560.2
Csa3G702570.1	Csa3G702570.2
Csa3G710230.1	Csa3G710230.2
Csa3G710730.1	Csa3G710730.2
Csa3G710750.1	Csa3G710750.2
Csa3G710780.1	Csa3G710790.1
Csa3G710870.1	Csa3G710870.2
Csa3G715370.1	Csa3G716370.1
Csa3G716370.1	Csa3G716870.1
Csa3G716870.1	Csa3G717370.1
Csa3G717370.1	Csa3G717870.1
Csa3G727890.1	Csa3G727890.2
Csa3G727970.1	Csa3G727970.2
Csa3G730150.1	Csa3G730150.2
Csa3G730730.1	Csa3G730730.2
Csa3G730830.1	Csa3G730830.2
Csa3G730910.1	Csa3G730920.1
Csa3G730950.1	Csa3G730960.1
Csa3G731060.1	Csa3G731060.2
Csa3G731060.2	Csa3G731060.3
Csa3G731070.1	Csa3G731080.1
Csa3G731080.1	Csa3G731090.1
Csa3G731220.1	Csa3G731220.2
Csa3G731220.2	Csa3G731220.3
Csa3G731780.1	Csa3G731780.2
Csa3G731790.1	Csa3G731790.3
Csa3G731790.3	Csa3G731790.2
Csa3G731800.1	Csa3G731810.1
Csa3G731810.1	Csa3G731820.1
Csa3G731820.1	Csa3G731830.1
Csa3G731830.1	Csa3G731840.1
Csa3G731840.1	Csa3G731850.1
Csa3G731850.1	Csa3G731860.1
Csa3G732580.1	Csa3G732580.2
Csa3G733190.1	Csa3G733190.2
Csa3G733220.1	Csa3G733230.1
Csa3G733250.1	Csa3G733260.1
Csa3G733260.1	Csa3G733260.2
Csa3G733290.1	Csa3G733290.2
Csa3G733860.1	Csa3G733870.1
Csa3G733870.1	Csa3G733880.1
Csa3G733900.1	Csa3G733900.2
Csa3G733920.1	Csa3G733920.3
Csa3G733920.3	Csa3G733920.2
Csa3G733960.1	Csa3G733970.1
Csa3G734030.1	Csa3G734040.1
Csa3G734040.1	Csa3G734050.1
Csa3G734170.1	Csa3G734170.2
Csa3G734280.2	Csa3G734280.1
Csa3G734360.1	Csa3G734360.2
Csa3G734900.1	Csa3G734900.2
Csa3G734970.2	Csa3G734970.1
Csa3G735010.1	Csa3G735010.2
Csa3G735050.1	Csa3G735050.2
Csa3G736660.1	Csa3G736670.1
Csa3G736840.1	Csa3G736840.2
Csa3G736850.1	Csa3G736850.2
Csa3G736920.1	Csa3G736920.2
Csa3G739020.1	Csa3G739020.2
Csa3G739020.2	Csa3G739020.3
Csa3G739020.3	Csa3G739020.4
Csa3G739550.1	Csa3G739550.2
Csa3G740110.1	Csa3G740110.2
Csa3G740190.1	Csa3G740190.2
Csa3G740230.1	Csa3G740240.1
Csa3G740820.1	Csa3G740820.2
Csa3G742870.1	Csa3G742880.1
Csa3G742880.1	Csa3G743380.1
Csa3G743380.1	Csa3G743390.1
Csa3G743970.1	Csa3G743980.1
Csa3G744990.1	Csa3G745000.1
Csa3G745000.1	Csa3G745010.1
Csa3G746550.1	Csa3G746550.2
Csa3G747640.1	Csa3G747640.2
Csa3G748220.1	Csa3G748220.2
Csa3G750380.1	Csa3G750380.2
Csa3G750380.2	Csa3G750380.3
Csa3G751430.1	Csa3G751440.1
Csa3G751460.1	Csa3G751460.2
Csa3G751980.1	Csa3G751980.2
Csa3G752490.1	Csa3G752490.2
Csa3G764550.1	Csa3G764550.2
Csa3G776320.1	Csa3G776320.2
Csa3G776860.1	Csa3G776860.2
Csa3G776860.2	Csa3G776860.3
Csa3G777540.1	Csa3G777550.1
Csa3G777580.1	Csa3G777580.2
Csa3G777650.1	Csa3G777650.2
Csa3G778190.1	Csa3G778190.2
Csa3G778190.2	Csa3G778190.3
Csa3G778190.3	Csa3G778190.4
Csa3G778230.1	Csa3G778240.1
Csa3G778270.1	Csa3G778280.1
Csa3G778290.1	Csa3G778300.1
Csa3G778380.1	Csa3G778390.1
Csa3G778960.1	Csa3G778970.1
Csa3G778970.1	Csa3G778980.1
Csa3G778990.1	Csa3G779000.1
Csa3G779000.1	Csa3G779010.1
Csa3G779010.1	Csa3G779020.1
Csa3G781560.1	Csa3G781560.2
Csa3G781610.1	Csa3G781610.2
Csa3G782620.1	Csa3G782620.2
Csa3G782620.2	Csa3G782620.3
Csa3G782790.1	Csa3G782790.2
Csa3G782790.2	Csa3G782790.3
Csa3G783840.1	Csa3G783840.3
Csa3G783840.4	Csa3G783840.2
Csa3G783840.3	Csa3G783840.4
Csa3G783850.1	Csa3G783850.2
Csa3G784370.1	Csa3G784370.2
Csa3G784390.1	Csa3G784390.3
Csa3G784390.3	Csa3G784390.2
Csa3G784390.2	Csa3G784390.4
Csa3G791510.1	Csa3G791520.1
Csa3G797580.1	Csa3G797580.2
Csa3G806250.1	Csa3G806260.1
Csa3G806810.1	Csa3G806810.2
Csa3G807340.1	Csa3G807340.2
Csa3G809390.1	Csa3G809390.2
Csa3G809390.2	Csa3G809390.3
Csa3G809390.3	Csa3G809390.4
Csa3G809930.1	Csa3G809940.1
Csa3G810520.2	Csa3G810520.1
Csa3G810520.3	Csa3G810520.2
Csa3G810550.1	Csa3G810550.2
Csa3G810550.2	Csa3G810550.3
Csa3G811590.2	Csa3G811590.1
Csa3G812100.1	Csa3G812100.2
Csa3G812180.2	Csa3G812180.1
Csa3G812220.1	Csa3G812230.1
Csa3G813290.1	Csa3G813290.2
Csa3G813820.1	Csa3G814320.1
Csa3G814390.1	Csa3G814400.1
Csa3G814400.1	Csa3G815400.1
Csa3G816040.1	Csa3G816040.2
Csa3G816670.1	Csa3G816680.1
Csa3G817720.1	Csa3G817720.2
Csa3G818270.1	Csa3G818280.1
Csa3G818280.1	Csa3G819280.1
Csa3G819280.1	Csa3G819780.1
Csa3G819830.1	Csa3G819840.1
Csa3G819890.1	Csa3G819900.1
Csa3G819900.1	Csa3G819910.1
Csa3G819910.1	Csa3G819920.1
Csa3G819920.1	Csa3G819930.1
Csa3G819940.1	Csa3G819950.1
Csa3G821550.1	Csa3G821550.2
Csa3G821590.1	Csa3G821600.1
Csa3G822210.1	Csa3G822210.2
Csa3G822330.1	Csa3G822330.2
Csa3G823040.1	Csa3G823040.2
Csa3G823640.1	Csa3G823640.2
Csa3G824160.1	Csa3G824160.2
Csa3G824160.2	Csa3G824160.3
Csa3G824210.1	Csa3G824220.1
Csa3G824230.1	Csa3G824230.2
Csa3G824730.1	Csa3G824740.1
Csa3G824910.1	Csa3G824910.2
Csa3G824940.1	Csa3G824950.1
Csa3G824950.1	Csa3G824950.2
Csa3G824970.1	Csa3G824970.2
Csa3G825050.1	Csa3G825060.1
Csa3G825090.1	Csa3G825100.1
Csa3G826640.1	Csa3G826650.1
Csa3G827240.1	Csa3G827240.2
Csa3G827930.1	Csa3G828430.1
Csa3G828430.1	Csa3G828930.1
Csa3G829250.1	Csa3G829260.1
Csa3G829260.1	Csa3G829270.1
Csa3G835770.1	Csa3G835780.1
Csa3G836410.1	Csa3G836420.1
Csa3G836430.1	Csa3G836440.1
Csa3G836520.1	Csa3G836520.2
Csa3G837640.1	Csa3G837640.2
Csa3G837640.2	Csa3G837640.3
Csa3G840370.1	Csa3G840370.2
Csa3G840390.1	Csa3G840390.2
Csa3G840400.1	Csa3G840400.2
Csa3G840410.1	Csa3G840410.2
Csa3G840410.2	Csa3G840410.3
Csa3G840420.1	Csa3G840430.1
Csa3G840450.1	Csa3G840450.2
Csa3G842040.1	Csa3G842050.1
Csa3G843800.1	Csa3G843810.1
Csa3G844850.1	Csa3G844850.2
Csa3G844850.2	Csa3G844850.3
Csa3G844870.1	Csa3G844870.2
Csa3G844880.1	Csa3G844880.2
Csa3G844900.1	Csa3G844900.2
Csa3G844900.3	Csa3G844900.1
Csa3G845460.1	Csa3G845460.2
Csa3G846020.1	Csa3G846020.2
Csa3G846030.1	Csa3G846030.2
Csa3G846560.1	Csa3G846560.2
Csa3G846580.1	Csa3G846590.1
Csa3G846590.1	Csa3G847090.1
Csa3G848140.1	Csa3G848140.2
Csa3G848150.2	Csa3G848150.1
Csa3G848200.1	Csa3G848210.1
Csa3G848250.1	Csa3G848250.2
Csa3G848850.1	Csa3G848850.2
Csa3G850500.1	Csa3G850500.2
Csa3G850500.2	Csa3G850500.3
Csa3G850550.2	Csa3G850550.1
Csa3G850570.1	Csa3G850580.1
Csa3G850580.1	Csa3G850590.1
Csa3G850650.1	Csa3G850660.1
Csa3G851800.1	Csa3G851800.2
Csa3G852480.1	Csa3G852490.1
Csa3G852510.1	Csa3G852510.2
Csa3G852580.1	Csa3G852590.1
Csa3G852590.1	Csa3G852600.1
Csa3G852610.1	Csa3G852620.1
Csa3G852620.1	Csa3G852630.1
Csa3G852630.1	Csa3G852640.1
Csa3G852640.1	Csa3G853140.1
Csa3G853150.1	Csa3G853160.1
Csa3G853160.1	Csa3G853170.1
Csa3G855340.1	Csa3G855350.1
Csa3G855350.1	Csa3G855360.1
Csa3G855930.1	Csa3G855930.2
Csa3G856000.1	Csa3G856000.2
Csa3G856010.1	Csa3G856010.2
Csa3G856010.2	Csa3G856010.3
Csa3G857040.2	Csa3G857040.1
Csa3G857040.1	Csa3G857040.3
Csa3G857050.1	Csa3G857050.2
Csa3G857580.1	Csa3G857580.2
Csa3G859620.1	Csa3G859630.1
Csa3G859630.1	Csa3G859640.1
Csa3G859640.1	Csa3G859640.2
Csa3G859640.2	Csa3G859650.1
Csa3G860230.1	Csa3G860230.2
Csa3G860260.1	Csa3G860260.2
Csa3G865360.1	Csa3G865360.2
Csa3G865940.1	Csa3G866440.1
Csa3G866520.1	Csa3G866520.2
Csa3G872140.1	Csa3G872140.2
Csa3G872160.1	Csa3G872170.1
Csa3G872730.1	Csa3G872730.2
Csa3G873800.1	Csa3G873800.2
Csa3G873810.1	Csa3G873810.2
Csa3G874330.1	Csa3G874330.2
Csa3G875960.1	Csa3G875970.1
Csa3G875980.1	Csa3G875980.2
Csa3G876020.1	Csa3G876020.2
Csa3G877640.1	Csa3G877640.2
Csa3G878190.2	Csa3G878190.1
Csa3G878210.1	Csa3G878210.2
Csa3G878840.1	Csa3G878840.2
Csa3G878860.1	Csa3G878860.2
Csa3G878900.1	Csa3G878900.2
Csa3G878900.2	Csa3G878900.3
Csa3G878930.1	Csa3G878930.2
Csa3G878930.2	Csa3G878930.3
Csa3G878940.2	Csa3G878940.1
Csa3G878950.1	Csa3G878950.2
Csa3G878960.2	Csa3G878960.1
Csa3G881060.1	Csa3G881060.2
Csa3G881600.1	Csa3G881610.1
Csa3G881650.1	Csa3G881650.2
Csa3G881660.1	Csa3G881660.2
Csa3G881670.1	Csa3G881670.2
Csa3G881720.1	Csa3G881720.2
Csa3G881740.1	Csa3G881750.1
Csa3G881750.1	Csa3G881760.1
Csa3G881760.1	Csa3G881770.1
Csa3G881900.1	Csa3G881900.2
Csa3G881900.2	Csa3G881900.3
Csa3G882980.1	Csa3G882990.1
Csa3G888540.1	Csa3G888540.2
Csa3G888580.1	Csa3G888580.2
Csa3G889120.1	Csa3G889120.2
Csa3G889150.1	Csa3G889150.2
Csa3G889770.1	Csa3G889780.1
Csa3G889890.2	Csa3G889890.1
Csa3G890010.1	Csa3G890020.1
Csa3G890030.1	Csa3G890030.2
Csa3G891670.1	Csa3G891670.2
Csa3G892210.1	Csa3G892210.2
Csa3G892730.1	Csa3G892730.2
Csa3G892750.1	Csa3G892760.1
Csa3G892760.1	Csa3G892770.1
Csa3G893320.1	Csa3G893330.1
Csa3G893350.1	Csa3G893360.1
Csa3G893360.1	Csa3G893360.2
Csa3G893360.2	Csa3G893370.1
Csa3G893390.1	Csa3G893390.2
Csa3G893950.1	Csa3G893960.1
Csa3G895050.1	Csa3G895050.2
Csa3G895640.1	Csa3G895640.2
Csa3G895660.1	Csa3G895660.2
Csa3G895710.1	Csa3G895710.2
Csa3G895750.1	Csa3G895750.2
Csa3G895770.1	Csa3G895770.2
Csa3G901000.1	Csa3G901000.2
Csa3G901020.1	Csa3G901020.2
Csa3G902230.1	Csa3G902240.1
Csa3G902330.1	Csa3G902340.1
Csa3G902410.1	Csa3G902910.1
Csa3G902910.1	Csa3G902920.1
Csa3G902930.1	Csa3G902930.2
Csa3G902960.1	Csa3G902960.2
Csa3G903530.1	Csa3G903530.2
Csa3G903530.2	Csa3G903540.1
Csa3G903540.1	Csa3G903550.1
Csa3G903550.1	Csa3G903560.1
Csa3G904110.1	Csa3G904110.2
Csa3G904140.1	Csa3G904140.2
Csa3G904140.2	Csa3G904140.3
Csa3G912940.1	Csa3G912950.1
Csa3G912950.1	Csa3G912950.2
Csa3G914010.1	Csa3G914010.2
Csa3G914030.1	Csa3G914030.2
Csa3G914040.1	Csa3G914040.2
Csa3G914570.1	Csa3G914580.1
Csa3G915130.1	Csa3G915130.2
Csa3G915170.1	Csa3G915180.1
Csa4G000610.1	Csa4G000610.2
Csa4G000820.2	Csa4G000820.1
Csa4G000820.1	Csa4G000830.1
Csa4G000850.1	Csa4G000860.1
Csa4G000930.1	Csa4G000930.2
Csa4G001550.1	Csa4G001560.1
Csa4G001700.1	Csa4G001700.2
Csa4G001740.1	Csa4G001740.2
Csa4G001850.1	Csa4G001860.1
Csa4G001890.1	Csa4G001900.1
Csa4G001900.1	Csa4G001910.1
Csa4G001910.1	Csa4G001920.1
Csa4G001980.1	Csa4G001980.2
Csa4G002500.1	Csa4G002510.1
Csa4G002510.1	Csa4G002520.1
Csa4G003700.1	Csa4G003700.2
Csa4G004790.1	Csa4G004790.2
Csa4G004850.1	Csa4G004850.2
Csa4G004850.2	Csa4G004850.3
Csa4G004860.1	Csa4G004860.2
Csa4G004990.3	Csa4G004990.1
Csa4G004990.2	Csa4G004990.3
Csa4G006050.1	Csa4G006060.1
Csa4G006060.1	Csa4G006070.1
Csa4G006120.1	Csa4G006130.1
Csa4G006140.1	Csa4G006150.1
Csa4G006150.1	Csa4G006160.1
Csa4G006230.1	Csa4G006230.2
Csa4G006320.1	Csa4G006320.2
Csa4G006320.2	Csa4G006320.3
Csa4G006320.3	Csa4G006330.1
Csa4G006380.1	Csa4G006380.2
Csa4G006400.1	Csa4G006410.1
Csa4G007040.1	Csa4G007040.2
Csa4G007600.1	Csa4G007600.2
Csa4G008260.1	Csa4G008760.1
Csa4G008760.1	Csa4G008770.1
Csa4G008770.1	Csa4G008780.1
Csa4G008800.1	Csa4G008800.2
Csa4G008820.2	Csa4G008820.1
Csa4G009340.1	Csa4G009340.2
Csa4G009360.1	Csa4G009360.2
Csa4G010400.1	Csa4G010400.2
Csa4G010400.2	Csa4G010400.3
Csa4G011700.1	Csa4G011700.2
Csa4G011820.1	Csa4G011820.2
Csa4G012370.1	Csa4G012370.2
Csa4G012380.1	Csa4G012380.2
Csa4G012530.3	Csa4G012530.1
Csa4G012530.2	Csa4G012530.3
Csa4G013540.1	Csa4G013540.2
Csa4G015800.1	Csa4G015800.2
Csa4G015840.1	Csa4G015850.1
Csa4G016470.1	Csa4G016480.1
Csa4G016480.1	Csa4G016490.1
Csa4G017030.1	Csa4G017030.2
Csa4G022210.1	Csa4G022220.1
Csa4G022320.1	Csa4G022330.1
Csa4G022340.1	Csa4G022340.2
Csa4G022880.1	Csa4G022880.2
Csa4G022910.1	Csa4G022920.1
Csa4G022960.1	Csa4G022960.2
Csa4G025180.1	Csa4G025180.2
Csa4G025200.1	Csa4G025200.2
Csa4G025200.2	Csa4G025200.3
Csa4G025200.3	Csa4G025200.4
Csa4G026280.1	Csa4G026280.2
Csa4G026810.1	Csa4G026820.1
Csa4G026840.1	Csa4G026840.2
Csa4G026910.2	Csa4G026910.1
Csa4G028440.2	Csa4G028440.1
Csa4G031020.1	Csa4G031020.2
Csa4G038660.1	Csa4G038660.2
Csa4G043830.1	Csa4G043840.1
Csa4G043920.1	Csa4G043920.2
Csa4G044460.1	Csa4G044460.2
Csa4G045040.1	Csa4G045050.1
Csa4G046640.1	Csa4G046640.2
Csa4G047350.1	Csa4G047350.2
Csa4G047360.1	Csa4G047360.2
Csa4G047910.1	Csa4G047910.2
Csa4G049070.1	Csa4G049070.3
Csa4G049070.3	Csa4G049070.2
Csa4G049610.1	Csa4G049610.2
Csa4G050240.1	Csa4G050250.1
Csa4G050260.1	Csa4G050270.1
Csa4G050270.1	Csa4G050280.1
Csa4G050280.1	Csa4G050780.1
Csa4G051400.1	Csa4G051410.1
Csa4G051560.1	Csa4G051560.2
Csa4G051560.2	Csa4G051560.3
Csa4G053250.1	Csa4G053260.1
Csa4G053260.1	Csa4G053270.1
Csa4G053280.1	Csa4G053780.1
Csa4G053780.1	Csa4G054280.1
Csa4G054280.1	Csa4G054290.1
Csa4G055390.1	Csa4G055400.1
Csa4G055400.1	Csa4G055410.1
Csa4G056500.1	Csa4G056500.2
Csa4G056760.1	Csa4G056760.2
Csa4G056770.1	Csa4G056770.2
Csa4G056770.2	Csa4G056780.1
Csa4G056830.1	Csa4G056840.1
Csa4G061840.1	Csa4G061840.2
Csa4G061860.1	Csa4G062360.1
Csa4G062910.1	Csa4G062910.2
Csa4G063430.1	Csa4G063430.2
Csa4G064020.1	Csa4G064020.2
Csa4G064110.1	Csa4G064120.1
Csa4G064630.1	Csa4G064640.1
Csa4G064640.1	Csa4G064650.1
Csa4G075200.1	Csa4G075200.2
Csa4G076250.1	Csa4G076250.2
Csa4G082320.1	Csa4G082320.2
Csa4G082350.1	Csa4G082350.2
Csa4G082370.1	Csa4G082380.1
Csa4G082400.1	Csa4G082400.3
Csa4G082400.3	Csa4G082400.2
Csa4G082440.1	Csa4G082450.1
Csa4G082970.1	Csa4G082970.2
Csa4G083490.1	Csa4G083490.2
Csa4G083540.1	Csa4G083540.2
Csa4G083540.2	Csa4G083540.3
Csa4G083600.1	Csa4G083610.1
Csa4G083620.1	Csa4G083620.2
Csa4G083630.1	Csa4G083640.1
Csa4G083650.1	Csa4G083650.2
Csa4G083690.1	Csa4G083690.2
Csa4G083710.1	Csa4G083710.2
Csa4G083710.2	Csa4G083710.3
Csa4G088740.1	Csa4G088740.2
Csa4G088750.1	Csa4G088750.2
Csa4G089270.1	Csa4G089270.2
Csa4G089280.2	Csa4G089280.1
Csa4G090360.1	Csa4G090360.2
Csa4G092950.1	Csa4G092950.2
Csa4G092980.1	Csa4G092980.2
Csa4G095550.1	Csa4G095550.2
Csa4G096620.1	Csa4G097120.1
Csa4G097640.1	Csa4G097640.2
Csa4G097670.1	Csa4G097680.1
Csa4G103350.1	Csa4G103350.2
Csa4G106850.1	Csa4G106850.2
Csa4G107450.1	Csa4G107450.2
Csa4G108510.1	Csa4G108510.2
Csa4G109040.1	Csa4G109540.1
Csa4G111580.1	Csa4G111590.1
Csa4G114230.2	Csa4G114230.1
Csa4G114230.1	Csa4G114230.3
Csa4G129040.1	Csa4G129050.1
Csa4G129560.1	Csa4G129570.1
Csa4G129570.1	Csa4G129580.1
Csa4G141230.1	Csa4G141240.1
Csa4G141240.1	Csa4G146240.1
Csa4G146240.1	Csa4G146250.1
Csa4G161850.1	Csa4G161850.2
Csa4G166940.1	Csa4G166940.2
Csa4G166940.2	Csa4G166940.3
Csa4G169490.1	Csa4G169490.2
Csa4G179150.1	Csa4G179150.2
Csa4G182240.1	Csa4G182240.2
Csa4G182240.2	Csa4G182240.3
Csa4G182270.1	Csa4G182270.2
Csa4G182280.1	Csa4G182290.1
Csa4G187320.1	Csa4G187820.1
Csa4G187830.1	Csa4G187830.2
Csa4G188390.1	Csa4G188390.2
Csa4G188400.1	Csa4G188400.2
Csa4G189000.1	Csa4G189010.1
Csa4G190010.1	Csa4G190020.1
Csa4G192110.1	Csa4G192110.2
Csa4G192230.1	Csa4G192730.1
Csa4G193260.1	Csa4G193260.2
Csa4G197830.1	Csa4G197830.2
Csa4G242360.1	Csa4G242360.2
Csa4G242360.2	Csa4G242360.3
Csa4G267470.1	Csa4G267480.1
Csa4G267480.1	Csa4G267980.1
Csa4G267990.2	Csa4G267990.1
Csa4G268040.1	Csa4G268040.2
Csa4G269120.1	Csa4G269120.2
Csa4G269120.2	Csa4G269130.1
Csa4G269130.1	Csa4G269130.2
Csa4G269130.2	Csa4G269130.3
Csa4G269170.1	Csa4G269170.2
Csa4G269780.1	Csa4G269780.2
Csa4G269780.2	Csa4G269780.5
[truncated: 1,791 more rows]

## Sheet: Segmental duplication events
############### Parameters ###############
# MATCH_SCORE: 50
# MATCH_SIZE: 5
# GAP_PENALTY: -1
# OVERLAP_WINDOW: 5
# E_VALUE: 1e-05
# MAX GAPS: 25
############### Statistics ###############
# Number of collinear genes: 3204, Percentage: 12.52
# Number of all genes: 25598
##########################################
## Alignment 0: score=1856.0 e_value=6.2e-151 N=42 Chr1&Chr1 plus
0- 0:	Csa1G009650.1	Csa1G033020.1	2e-80
0- 1:	Csa1G009680.1	Csa1G033030.1	2e-40
0- 2:	Csa1G009700.1	Csa1G033200.1	3e-62
0- 3:	Csa1G009720.1	Csa1G033220.1	2e-12
0- 4:	Csa1G009790.1	Csa1G033250.1	5e-143
0- 5:	Csa1G009810.1	Csa1G033310.1	5e-166
0- 6:	Csa1G009820.1	Csa1G033320.1	6e-96
0- 7:	Csa1G009840.1	Csa1G038330.1	1e-108
0- 8:	Csa1G009870.1	Csa1G038340.1	2e-132
0- 9:	Csa1G011450.1	Csa1G038890.1	1e-98
0- 10:	Csa1G011470.1	Csa1G038900.1	0
0- 11:	Csa1G011570.1	Csa1G038980.1	0
0- 12:	Csa1G012090.1	Csa1G039010.1	3e-39
0- 13:	Csa1G012100.1	Csa1G039020.1	4e-112
0- 14:	Csa1G012120.1	Csa1G039050.1	5e-82
0- 15:	Csa1G013170.1	Csa1G039100.1	0
0- 16:	Csa1G013210.1	Csa1G039150.1	3e-52
0- 17:	Csa1G013760.1	Csa1G039170.1	2e-74
0- 18:	Csa1G013770.1	Csa1G039180.1	2e-45
0- 19:	Csa1G014310.1	Csa1G039270.1	3e-40
0- 20:	Csa1G014320.1	Csa1G039280.1	0
0- 21:	Csa1G014340.1	Csa1G039290.1	4e-105
0- 22:	Csa1G015080.1	Csa1G039980.1	3e-177
0- 23:	Csa1G015810.1	Csa1G042090.1	9e-122
0- 24:	Csa1G015870.1	Csa1G042160.1	4e-43
0- 25:	Csa1G020890.1	Csa1G042180.1	7e-32
0- 26:	Csa1G021980.1	Csa1G042220.1	5e-122
0- 27:	Csa1G022530.1	Csa1G042270.1	3e-17
0- 28:	Csa1G023610.1	Csa1G042330.1	0
0- 29:	Csa1G024150.1	Csa1G042340.1	3e-73
0- 30:	Csa1G024160.1	Csa1G042350.1	4e-31
0- 31:	Csa1G024170.1	Csa1G042360.1	2e-125
0- 32:	Csa1G024190.1	Csa1G042400.1	4e-28
0- 33:	Csa1G024220.1	Csa1G042430.1	3e-126
0- 34:	Csa1G024230.1	Csa1G042480.1	4e-164
0- 35:	Csa1G024260.1	Csa1G042590.1	9e-16
0- 36:	Csa1G024290.1	Csa1G042630.1	7e-86
0- 37:	Csa1G024990.1	Csa1G042720.1	0
0- 38:	Csa1G025040.1	Csa1G042780.1	3e-52
0- 39:	Csa1G025050.1	Csa1G042800.1	0
0- 40:	Csa1G025070.1	Csa1G042820.1	0
0- 41:	Csa1G025080.1	Csa1G042830.1	1e-85
## Alignment 1: score=830.0 e_value=1.6e-52 N=19 Chr1&Chr1 minus
1- 0:	Csa1G004110.1	Csa1G046820.1	2e-09
1- 1:	Csa1G004240.1	Csa1G046270.1	0
1- 2:	Csa1G004280.1	Csa1G046260.1	0
1- 3:	Csa1G004920.1	Csa1G046050.1	2e-39
1- 4:	Csa1G004990.1	Csa1G046030.1	0
1- 5:	Csa1G005540.1	Csa1G045970.1	3e-18
1- 6:	Csa1G005570.1	Csa1G045950.1	6e-43
1- 7:	Csa1G005590.1	Csa1G045930.1	4e-99
1- 8:	Csa1G005650.1	Csa1G045900.1	2e-61
1- 9:	Csa1G005720.1	Csa1G045880.1	5e-104
1- 10:	Csa1G005730.1	Csa1G045860.1	0
1- 11:	Csa1G006290.1	Csa1G045820.1	9e-109
1- 12:	Csa1G007850.1	Csa1G045730.1	4e-85
1- 13:	Csa1G008410.1	Csa1G045690.1	1e-64
1- 14:	Csa1G008520.1	Csa1G045600.1	0
1- 15:	Csa1G008530.1	Csa1G045580.1	9e-146
1- 16:	Csa1G008550.1	Csa1G045570.1	0
1- 17:	Csa1G009580.1	Csa1G045480.1	1e-98
1- 18:	Csa1G009600.1	Csa1G045470.1	2e-80
## Alignment 2: score=368.0 e_value=6.2e-16 N=9 Chr1&Chr1 minus
2- 0:	Csa1G000560.1	Csa1G051780.1	0
2- 1:	Csa1G000700.1	Csa1G051740.1	5e-44
2- 2:	Csa1G001290.1	Csa1G051710.1	9e-91
2- 3:	Csa1G001430.1	Csa1G051620.1	3e-95
2- 4:	Csa1G001450.1	Csa1G051590.1	1e-83
2- 5:	Csa1G002030.1	Csa1G050480.1	4e-157
2- 6:	Csa1G002130.1	Csa1G050380.1	0
2- 7:	Csa1G002150.1	Csa1G050340.1	3e-160
2- 8:	Csa1G002790.1	Csa1G050210.1	4e-103
## Alignment 3: score=365.0 e_value=1.1e-14 N=8 Chr1&Chr1 minus
3- 0:	Csa1G014390.1	Csa1G041550.1	3e-122
3- 1:	Csa1G014500.1	Csa1G041540.1	0
3- 2:	Csa1G015580.1	Csa1G039970.1	0
3- 3:	Csa1G015630.1	Csa1G039940.1	6e-06
3- 4:	Csa1G015670.1	Csa1G039920.1	6e-23
3- 5:	Csa1G015680.1	Csa1G039890.1	0
3- 6:	Csa1G015690.1	Csa1G039880.1	0
3- 7:	Csa1G015700.1	Csa1G039860.1	0
## Alignment 4: score=500.0 e_value=2.8e-24 N=11 Chr1&Chr2 plus
4- 0:	Csa1G423110.1	Csa2G058690.1	2e-79
4- 1:	Csa1G423150.1	Csa2G059720.1	0
4- 2:	Csa1G423160.1	Csa2G059740.1	3e-13
4- 3:	Csa1G423210.1	Csa2G059760.1	0
4- 4:	Csa1G423290.1	Csa2G060380.1	5e-154
4- 5:	Csa1G423300.1	Csa2G060390.1	0
4- 6:	Csa1G423340.1	Csa2G060450.1	0
4- 7:	Csa1G424340.1	Csa2G060480.1	0
4- 8:	Csa1G424360.1	Csa2G060500.1	3e-157
4- 9:	Csa1G426450.1	Csa2G061600.1	0
4- 10:	Csa1G427510.1	Csa2G062630.1	2e-156
## Alignment 5: score=495.0 e_value=4e-24 N=11 Chr1&Chr2 plus
5- 0:	Csa1G302180.1	Csa2G005970.1	0
5- 1:	Csa1G305710.1	Csa2G006030.1	0
5- 2:	Csa1G305720.3	Csa2G006040.1	1e-49
5- 3:	Csa1G306810.1	Csa2G006080.1	5e-52
5- 4:	Csa1G320340.1	Csa2G006140.1	3e-61
5- 5:	Csa1G324370.1	Csa2G006170.1	0
5- 6:	Csa1G338930.1	Csa2G006260.1	2e-136
5- 7:	Csa1G340430.1	Csa2G006270.1	8e-77
5- 8:	Csa1G342430.1	Csa2G006280.1	2e-12
5- 9:	Csa1G348430.1	Csa2G006860.1	1e-26
5- 10:	Csa1G348440.1	Csa2G006880.1	8e-21
## Alignment 6: score=322.0 e_value=5.2e-11 N=7 Chr1&Chr2 plus
6- 0:	Csa1G277970.1	Csa2G037230.1	0
6- 1:	Csa1G287020.1	Csa2G037260.1	4e-134
6- 2:	Csa1G288020.1	Csa2G042770.1	3e-68
6- 3:	Csa1G294080.1	Csa2G047790.1	1e-41
6- 4:	Csa1G294100.1	Csa2G047800.1	0
6- 5:	Csa1G294600.1	Csa2G047810.1	3e-121
6- 6:	Csa1G302180.1	Csa2G049870.1	1e-112
## Alignment 7: score=317.0 e_value=1.1e-10 N=7 Chr1&Chr2 plus
7- 0:	Csa1G383520.1	Csa2G004760.1	0
7- 1:	Csa1G384030.1	Csa2G005300.1	9e-20
7- 2:	Csa1G385560.2	Csa2G005310.1	0
7- 3:	Csa1G391600.1	Csa2G005340.1	2e-11
7- 4:	Csa1G397120.2	Csa2G005370.1	0
7- 5:	Csa1G407160.1	Csa2G005900.1	0
7- 6:	Csa1G408200.1	Csa2G005920.1	5e-107
## Alignment 8: score=278.0 e_value=4.3e-10 N=7 Chr1&Chr2 plus
8- 0:	Csa1G046140.3	Csa2G348880.1	5e-116
8- 1:	Csa1G046260.1	Csa2G348990.1	0
8- 2:	Csa1G046830.1	Csa2G349060.1	0
8- 3:	Csa1G047450.1	Csa2G349630.1	2e-55
8- 4:	Csa1G049960.1	Csa2G350210.1	0
8- 5:	Csa1G050110.1	Csa2G350270.1	4e-92
8- 6:	Csa1G050210.1	Csa2G350320.1	2e-46
## Alignment 9: score=253.0 e_value=3.4e-09 N=6 Chr1&Chr2 plus
9- 0:	Csa1G256780.1	Csa2G035530.1	8e-53
9- 1:	Csa1G257300.1	Csa2G036040.1	2e-36
9- 2:	Csa1G257350.1	Csa2G036080.1	0
9- 3:	Csa1G257910.1	Csa2G036640.1	0
9- 4:	Csa1G263990.1	Csa2G036720.1	2e-11
9- 5:	Csa1G265130.1	Csa2G049880.1	6e-35
## Alignment 10: score=948.0 e_value=8.4e-62 N=22 Chr1&Chr2 minus
10- 0:	Csa1G574850.1	Csa2G000960.1	1e-52
10- 1:	Csa1G574940.1	Csa2G000890.1	1e-118
10- 2:	Csa1G574970.2	Csa2G000830.4	0
10- 3:	Csa1G574980.1	Csa2G000800.1	0
10- 4:	Csa1G575060.1	Csa2G000790.1	3e-23
10- 5:	Csa1G575090.1	Csa2G000710.1	3e-151
10- 6:	Csa1G575100.1	Csa2G000690.1	0
10- 7:	Csa1G575130.1	Csa2G000640.1	0
10- 8:	Csa1G575160.1	Csa2G000620.1	5e-130
10- 9:	Csa1G580200.2	Csa2G000600.1	2e-79
10- 10:	Csa1G580240.1	Csa2G000550.1	3e-74
10- 11:	Csa1G586890.1	Csa2G000510.1	2e-64
10- 12:	Csa1G588560.1	Csa2G000440.1	6e-136
10- 13:	Csa1G589140.1	Csa2G000420.1	2e-43
10- 14:	Csa1G589750.1	Csa2G000340.1	0
10- 15:	Csa1G590270.1	Csa2G000280.1	0
10- 16:	Csa1G595840.1	Csa2G000260.1	5e-47
10- 17:	Csa1G595850.1	Csa2G000210.1	3e-39
10- 18:	Csa1G595880.1	Csa2G000170.1	4e-106
10- 19:	Csa1G597020.1	Csa2G000130.1	0
10- 20:	Csa1G597030.1	Csa2G000120.1	7e-83
10- 21:	Csa1G597050.1	Csa2G000110.1	6e-41
## Alignment 11: score=415.0 e_value=1.1e-16 N=9 Chr1&Chr2 minus
11- 0:	Csa1G264020.1	Csa2G009440.1	6e-82
11- 1:	Csa1G264530.1	Csa2G009430.1	0
11- 2:	Csa1G265120.1	Csa2G009360.1	2e-24
11- 3:	Csa1G265650.1	Csa2G009330.1	7e-22
11- 4:	Csa1G266160.1	Csa2G009320.1	0
11- 5:	Csa1G267210.1	Csa2G009310.1	0
11- 6:	Csa1G267220.1	Csa2G008760.1	3e-44
11- 7:	Csa1G267770.1	Csa2G008740.1	0
11- 8:	Csa1G268280.1	Csa2G008710.1	1e-94
## Alignment 12: score=355.0 e_value=1e-14 N=8 Chr1&Chr2 minus
12- 0:	Csa1G418800.1	Csa2G058100.1	7e-25
12- 1:	Csa1G420310.1	Csa2G057080.1	1e-87
12- 2:	Csa1G420860.1	Csa2G049940.1	5e-74
12- 3:	Csa1G420880.1	Csa2G049890.1	2e-50
12- 4:	Csa1G422440.1	Csa2G049350.1	5e-27
12- 5:	Csa1G422470.1	Csa2G049330.1	6e-116
12- 6:	Csa1G423020.1	Csa2G048330.1	0
12- 7:	Csa1G423100.1	Csa2G047830.1	0
## Alignment 13: score=253.0 e_value=1.1e-08 N=6 Chr1&Chr2 minus
13- 0:	Csa1G573570.1	Csa2G013300.2	4e-12
13- 1:	Csa1G573600.1	Csa2G013250.1	4e-78
13- 2:	Csa1G573620.1	Csa2G012720.1	0
13- 3:	Csa1G574790.1	Csa2G012660.1	6e-149
13- 4:	Csa1G574830.1	Csa2G012130.1	1e-47
13- 5:	Csa1G575000.1	Csa2G011550.1	5e-25
## Alignment 14: score=424.0 e_value=4.5e-23 N=11 Chr1&Chr3 plus
14- 0:	Csa1G000600.1	Csa3G556200.1	0
14- 1:	Csa1G001320.1	Csa3G563280.2	3e-58
14- 2:	Csa1G001450.1	Csa3G567830.1	6e-42
14- 3:	Csa1G002090.1	Csa3G585890.1	0
14- 4:	Csa1G002110.1	Csa3G588520.1	7e-42
14- 5:	Csa1G002150.1	Csa3G588530.1	2e-10
14- 6:	Csa1G002680.1	Csa3G589570.1	0
14- 7:	Csa1G002750.1	Csa3G592150.1	5e-113
14- 8:	Csa1G002830.1	Csa3G592170.1	0
14- 9:	Csa1G002870.1	Csa3G597260.1	0
14- 10:	Csa1G003520.1	Csa3G598390.1	0
## Alignment 15: score=366.0 e_value=8.1e-17 N=9 Chr1&Chr3 plus
15- 0:	Csa1G066560.1	Csa3G097040.1	6e-60
15- 1:	Csa1G070610.1	Csa3G099570.1	3e-90
15- 2:	Csa1G071150.1	Csa3G099580.1	1e-126
15- 3:	Csa1G071800.1	Csa3G099590.1	1e-24
15- 4:	Csa1G071940.1	Csa3G099710.1	3e-63
15- 5:	Csa1G073060.1	Csa3G100800.1	2e-87
15- 6:	Csa1G073070.1	Csa3G102820.1	1e-40
15- 7:	Csa1G073650.1	Csa3G104340.1	3e-67
15- 8:	Csa1G073780.1	Csa3G104890.1	1e-161
## Alignment 16: score=271.0 e_value=5e-12 N=7 Chr1&Chr3 plus
16- 0:	Csa1G045880.1	Csa3G829170.1	4e-75
16- 1:	Csa1G045890.1	Csa3G829190.1	6e-23
16- 2:	Csa1G046010.1	Csa3G836410.1	8e-89
16- 3:	Csa1G046050.1	Csa3G837040.1	1e-15
16- 4:	Csa1G046140.3	Csa3G838670.1	8e-109
16- 5:	Csa1G046280.1	Csa3G838720.1	0
16- 6:	Csa1G046300.1	Csa3G838790.1	6e-30
## Alignment 17: score=271.0 e_value=1e-08 N=6 Chr1&Chr3 plus
17- 0:	Csa1G103270.1	Csa3G740220.1	4e-43
17- 1:	Csa1G108800.1	Csa3G740270.1	0
17- 2:	Csa1G109320.1	Csa3G740800.1	4e-53
17- 3:	Csa1G109370.1	Csa3G741330.1	7e-143
17- 4:	Csa1G120420.1	Csa3G742870.1	4e-80
17- 5:	Csa1G120470.1	Csa3G742880.1	2e-90
## Alignment 18: score=444.0 e_value=4.9e-25 N=11 Chr1&Chr3 minus
18- 0:	Csa1G505950.2	Csa3G734310.1	4e-65
18- 1:	Csa1G523040.1	Csa3G734200.1	2e-176
18- 2:	Csa1G523610.1	Csa3G734180.1	0
18- 3:	Csa1G523620.2	Csa3G734170.1	4e-120
18- 4:	Csa1G524720.1	Csa3G733960.1	8e-35
18- 5:	Csa1G525300.1	Csa3G733290.1	3e-18
18- 6:	Csa1G525320.1	Csa3G733250.1	2e-06
18- 7:	Csa1G526820.1	Csa3G733240.1	8e-39
18- 8:	Csa1G527920.1	Csa3G733180.1	5e-50
18- 9:	Csa1G528480.1	Csa3G732520.1	4e-166
18- 10:	Csa1G528530.1	Csa3G732490.1	0
## Alignment 19: score=275.0 e_value=1.9e-10 N=7 Chr1&Chr3 minus
19- 0:	Csa1G004920.1	Csa3G837040.1	5e-20
19- 1:	Csa1G005500.1	Csa3G836460.1	1e-109
19- 2:	Csa1G005530.1	Csa3G835850.1	0
19- 3:	Csa1G005620.1	Csa3G829230.1	0
19- 4:	Csa1G005720.1	Csa3G829170.1	2e-73
19- 5:	Csa1G006280.1	Csa3G829100.1	0
19- 6:	Csa1G008430.1	Csa3G828990.1	3e-44
## Alignment 20: score=258.0 e_value=4e-09 N=6 Chr1&Chr3 minus
20- 0:	Csa1G574850.1	Csa3G462680.1	6e-32
20- 1:	Csa1G574870.1	Csa3G444620.1	0
20- 2:	Csa1G575000.1	Csa3G435550.1	1e-73
20- 3:	Csa1G575060.1	Csa3G435530.1	3e-19
20- 4:	Csa1G575110.1	Csa3G434990.1	0
20- 5:	Csa1G575130.1	Csa3G434960.1	7e-176
## Alignment 21: score=257.0 e_value=6.2e-09 N=6 Chr1&Chr3 minus
21- 0:	Csa1G569090.1	Csa3G165640.1	1e-18
21- 1:	Csa1G569220.1	Csa3G164510.1	0
21- 2:	Csa1G569240.1	Csa3G164490.1	5e-142
21- 3:	Csa1G569280.1	Csa3G159450.1	1e-66
21- 4:	Csa1G569310.1	Csa3G154390.1	5e-92
21- 5:	Csa1G569470.1	Csa3G153730.1	2e-33
## Alignment 22: score=471.0 e_value=1.3e-26 N=12 Chr1&Chr4 plus
22- 0:	Csa1G575190.1	Csa4G645850.1	8e-27
22- 1:	Csa1G586780.1	Csa4G645970.1	7e-77
22- 2:	Csa1G587970.1	Csa4G646060.1	1e-23
22- 3:	Csa1G589090.1	Csa4G646070.1	4e-19
22- 4:	Csa1G589110.1	Csa4G646100.1	7e-83
22- 5:	Csa1G589660.1	Csa4G646210.1	2e-29
22- 6:	Csa1G589710.1	Csa4G646260.1	0
22- 7:	Csa1G589720.1	Csa4G646280.1	2e-105
22- 8:	Csa1G595830.1	Csa4G647430.1	0
22- 9:	Csa1G597020.1	Csa4G648560.1	1e-152
22- 10:	Csa1G597090.1	Csa4G648590.1	7e-37
22- 11:	Csa1G597730.1	Csa4G649620.1	4e-41
## Alignment 23: score=327.0 e_value=8e-14 N=8 Chr1&Chr4 plus
23- 0:	Csa1G481200.1	Csa4G293250.1	3e-130
23- 1:	Csa1G495290.1	Csa4G293320.1	0
23- 2:	Csa1G502880.1	Csa4G294940.1	1e-124
23- 3:	Csa1G505950.2	Csa4G295460.1	4e-46
23- 4:	Csa1G506960.1	Csa4G295530.1	3e-08
23- 5:	Csa1G522520.1	Csa4G296090.1	9e-173
23- 6:	Csa1G522540.1	Csa4G296100.1	4e-165
23- 7:	Csa1G523620.2	Csa4G296140.1	4e-111
## Alignment 24: score=357.0 e_value=6.2e-14 N=8 Chr1&Chr4 minus
24- 0:	Csa1G039270.1	Csa4G132680.1	3e-37
24- 1:	Csa1G039290.1	Csa4G131130.1	5e-82
24- 2:	Csa1G039860.1	Csa4G129040.1	0
24- 3:	Csa1G039880.1	Csa4G128010.1	0
24- 4:	Csa1G039900.1	Csa4G126480.1	2e-20
24- 5:	Csa1G039970.1	Csa4G125420.1	0
24- 6:	Csa1G039980.1	Csa4G125410.1	1e-53
24- 7:	Csa1G040010.1	Csa4G122810.1	1e-10
## Alignment 25: score=305.0 e_value=5.7e-10 N=7 Chr1&Chr4 minus
25- 0:	Csa1G073650.1	Csa4G638370.1	2e-70
25- 1:	Csa1G073740.1	Csa4G637820.1	1e-124
25- 2:	Csa1G073810.1	Csa4G637750.1	1e-55
25- 3:	Csa1G073870.1	Csa4G637690.1	0
25- 4:	Csa1G074920.1	Csa4G637130.1	7e-54
25- 5:	Csa1G074980.1	Csa4G631590.1	8e-43
25- 6:	Csa1G075050.1	Csa4G630520.1	7e-51
## Alignment 26: score=1243.0 e_value=5.4e-91 N=29 Chr1&Chr5 plus
26- 0:	Csa1G032490.1	Csa5G604950.1	0
26- 1:	Csa1G033020.1	Csa5G604990.1	5e-63
26- 2:	Csa1G033030.1	Csa5G605000.1	2e-57
26- 3:	Csa1G033080.1	Csa5G605030.1	9e-34
26- 4:	Csa1G033120.1	Csa5G605060.1	3e-11
26- 5:	Csa1G033230.1	Csa5G605090.1	1e-100
26- 6:	Csa1G033240.1	Csa5G605220.1	3e-07
26- 7:	Csa1G033250.1	Csa5G605720.1	3e-81
26- 8:	Csa1G033300.1	Csa5G605750.1	2e-77
26- 9:	Csa1G033320.1	Csa5G605760.1	3e-103
26- 10:	Csa1G038350.1	Csa5G606350.1	0
26- 11:	Csa1G038890.1	Csa5G606450.1	4e-20
26- 12:	Csa1G038930.1	Csa5G606500.1	1e-84
26- 13:	Csa1G038940.1	Csa5G606520.1	5e-27
26- 14:	Csa1G038980.1	Csa5G606560.1	0
26- 15:	Csa1G039020.1	Csa5G606590.1	3e-116
26- 16:	Csa1G039050.1	Csa5G606610.1	5e-16
26- 17:	Csa1G039150.1	Csa5G606660.1	8e-39
26- 18:	Csa1G039230.2	Csa5G606730.1	7e-26
26- 19:	Csa1G039920.1	Csa5G606800.1	3e-47
26- 20:	Csa1G039940.1	Csa5G606850.1	5e-06
26- 21:	Csa1G040010.1	Csa5G608000.1	5e-08
26- 22:	Csa1G041570.1	Csa5G608160.1	2e-30
26- 23:	Csa1G042090.1	Csa5G608220.1	5e-85
26- 24:	Csa1G042180.1	Csa5G608320.1	7e-20
26- 25:	Csa1G042210.1	Csa5G608440.1	3e-79
26- 26:	Csa1G042220.1	Csa5G608450.1	0
26- 27:	Csa1G042270.1	Csa5G608610.1	8e-16
26- 28:	Csa1G042290.1	Csa5G609620.1	6e-32
## Alignment 27: score=770.0 e_value=6.6e-54 N=20 Chr1&Chr5 plus
27- 0:	Csa1G004280.1	Csa5G599810.1	0
27- 1:	Csa1G004870.1	Csa5G600390.1	7e-85
27- 2:	Csa1G004920.1	Csa5G601550.1	1e-12
27- 3:	Csa1G005540.1	Csa5G602150.1	2e-146
27- 4:	Csa1G005560.1	Csa5G602180.1	0
27- 5:	Csa1G005640.3	Csa5G603280.1	0
27- 6:	Csa1G005650.1	Csa5G603290.1	3e-52
27- 7:	Csa1G006300.1	Csa5G603910.1	6e-65
27- 8:	Csa1G007850.1	Csa5G604000.1	5e-40
27- 9:	Csa1G008530.1	Csa5G604170.1	5e-165
27- 10:	Csa1G008560.1	Csa5G604280.1	0
27- 11:	Csa1G009650.1	Csa5G604990.1	1e-67
27- 12:	Csa1G009680.1	Csa5G605000.1	9e-65
27- 13:	Csa1G009790.1	Csa5G605720.1	3e-79
27- 14:	Csa1G009820.1	Csa5G605760.1	1e-143
27- 15:	Csa1G011450.1	Csa5G606450.1	4e-22
27- 16:	Csa1G012100.1	Csa5G606590.1	2e-117
27- 17:	Csa1G012120.1	Csa5G606610.1	2e-19
27- 18:	Csa1G013210.1	Csa5G606660.1	4e-38
27- 19:	Csa1G013790.1	Csa5G606710.1	2e-19
## Alignment 28: score=749.0 e_value=4.6e-43 N=17 Chr1&Chr5 plus
28- 0:	Csa1G015780.1	Csa5G608150.1	9e-90
28- 1:	Csa1G015810.1	Csa5G608220.1	1e-86
28- 2:	Csa1G020890.1	Csa5G608320.1	4e-22
28- 3:	Csa1G021980.1	Csa5G608450.1	4e-117
28- 4:	Csa1G022500.1	Csa5G608530.1	0
28- 5:	Csa1G022530.1	Csa5G608610.1	3e-16
28- 6:	Csa1G023050.1	Csa5G609670.1	3e-76
28- 7:	Csa1G023060.1	Csa5G609680.1	7e-64
28- 8:	Csa1G023070.1	Csa5G609720.1	1e-35
28- 9:	Csa1G023620.1	Csa5G609750.1	4e-15
28- 10:	Csa1G024200.1	Csa5G609800.1	4e-38
28- 11:	Csa1G024210.1	Csa5G610330.1	0
28- 12:	Csa1G024230.1	Csa5G610360.1	1e-160
28- 13:	Csa1G024240.1	Csa5G610390.1	9e-130
28- 14:	Csa1G024270.1	Csa5G610450.1	4e-130
28- 15:	Csa1G024810.1	Csa5G611030.1	0
28- 16:	Csa1G024880.1	Csa5G611080.1	1e-142
## Alignment 29: score=304.0 e_value=1.9e-14 N=8 Chr1&Chr5 plus
29- 0:	Csa1G032990.1	Csa5G635950.1	7e-17
29- 1:	Csa1G033260.1	Csa5G636620.1	6e-19
29- 2:	Csa1G033320.1	Csa5G636630.1	6e-105
29- 3:	Csa1G038340.1	Csa5G637160.1	1e-87
29- 4:	Csa1G038910.1	Csa5G637790.1	0
29- 5:	Csa1G038960.1	Csa5G638370.1	5e-31
29- 6:	Csa1G039070.1	Csa5G638470.1	8e-57
29- 7:	Csa1G039280.1	Csa5G639500.1	8e-109
## Alignment 30: score=276.0 e_value=4.8e-11 N=7 Chr1&Chr5 plus
30- 0:	Csa1G507460.1	Csa5G182000.1	6e-65
30- 1:	Csa1G522530.1	Csa5G182100.1	8e-167
30- 2:	Csa1G522540.1	Csa5G182120.1	8e-166
30- 3:	Csa1G523110.1	Csa5G182630.1	8e-142
30- 4:	Csa1G524720.1	Csa5G184270.1	2e-35
30- 5:	Csa1G525300.1	Csa5G188900.1	2e-10
30- 6:	Csa1G527860.1	Csa5G190530.1	2e-24
## Alignment 31: score=509.0 e_value=2e-25 N=12 Chr1&Chr5 minus
31- 0:	Csa1G045430.1	Csa5G604940.1	6e-34
31- 1:	Csa1G045510.1	Csa5G604340.1	0
31- 2:	Csa1G045550.1	Csa5G604260.1	3e-34
31- 3:	Csa1G045580.1	Csa5G604170.1	4e-138
31- 4:	Csa1G045610.1	Csa5G604140.1	6e-146
31- 5:	Csa1G045680.1	Csa5G604080.1	0
31- 6:	Csa1G045730.1	Csa5G604000.1	5e-45
31- 7:	Csa1G045900.1	Csa5G603290.1	4e-54
31- 8:	Csa1G045940.1	Csa5G602200.1	3e-85
31- 9:	Csa1G045970.1	Csa5G602150.1	8e-18
31- 10:	Csa1G045990.1	Csa5G601620.1	0
31- 11:	Csa1G046050.1	Csa5G601550.1	1e-11
## Alignment 32: score=375.0 e_value=9.8e-19 N=9 Chr1&Chr5 minus
32- 0:	Csa1G045430.1	Csa5G635950.1	3e-33
32- 1:	Csa1G045550.3	Csa5G635430.1	3e-38
32- 2:	Csa1G045600.1	Csa5G635370.1	0
32- 3:	Csa1G045650.1	Csa5G633290.1	3e-174
32- 4:	Csa1G045750.1	Csa5G633210.1	8e-41
32- 5:	Csa1G045860.1	Csa5G631520.1	3e-154
32- 6:	Csa1G045880.1	Csa5G631510.1	3e-84
32- 7:	Csa1G045940.1	Csa5G630880.1	5e-110
32- 8:	Csa1G045950.1	Csa5G630870.1	5e-26
## Alignment 33: score=1841.0 e_value=5.4e-147 N=42 Chr1&Chr6 plus
33- 0:	Csa1G059200.1	Csa6G513500.1	5e-113
33- 1:	Csa1G062290.1	Csa6G513550.1	0
33- 2:	Csa1G062300.1	Csa6G513600.1	1e-125
33- 3:	Csa1G062380.1	Csa6G513670.1	0
33- 4:	Csa1G062880.1	Csa6G513680.2	1e-135
33- 5:	Csa1G062890.1	Csa6G513730.1	1e-66
33- 6:	Csa1G062900.1	Csa6G513740.1	0
33- 7:	Csa1G062910.1	Csa6G513750.1	2e-45
33- 8:	Csa1G062930.1	Csa6G513760.1	0
33- 9:	Csa1G063490.1	Csa6G514300.1	8e-14
33- 10:	Csa1G063510.1	Csa6G514800.1	7e-31
33- 11:	Csa1G063600.1	Csa6G514830.1	1e-22
33- 12:	Csa1G064670.1	Csa6G514870.2	0
33- 13:	Csa1G064680.1	Csa6G514880.1	8e-41
33- 14:	Csa1G064750.1	Csa6G515450.1	4e-28
33- 15:	Csa1G064790.1	Csa6G515500.1	3e-48
33- 16:	Csa1G064830.1	Csa6G516550.1	2e-12
33- 17:	Csa1G065380.1	Csa6G516580.1	2e-116
33- 18:	Csa1G065400.1	Csa6G516590.2	8e-24
33- 19:	Csa1G065930.1	Csa6G516630.1	2e-50
33- 20:	Csa1G066490.1	Csa6G516650.1	1e-47
33- 21:	Csa1G070590.1	Csa6G516730.1	3e-49
33- 22:	Csa1G071260.1	Csa6G516770.1	2e-89
33- 23:	Csa1G071810.1	Csa6G516780.1	6e-28
33- 24:	Csa1G071840.1	Csa6G516850.1	1e-07
33- 25:	Csa1G071850.1	Csa6G516870.1	3e-06
33- 26:	Csa1G071870.1	Csa6G516920.1	0
33- 27:	Csa1G071890.1	Csa6G517010.1	4e-13
33- 28:	Csa1G072990.1	Csa6G517100.1	4e-40
33- 29:	Csa1G073680.1	Csa6G517170.1	1e-25
33- 30:	Csa1G073740.1	Csa6G517230.1	3e-147
33- 31:	Csa1G073810.1	Csa6G517320.1	3e-94
33- 32:	Csa1G074900.1	Csa6G517390.1	0
33- 33:	Csa1G074910.1	Csa6G517400.1	1e-58
33- 34:	Csa1G074920.1	Csa6G517410.1	5e-75
33- 35:	Csa1G074960.1	Csa6G517940.1	7e-33
33- 36:	Csa1G074980.1	Csa6G517960.1	4e-42
33- 37:	Csa1G075000.1	Csa6G518000.1	3e-47
33- 38:	Csa1G075030.1	Csa6G518040.1	2e-29
33- 39:	Csa1G075600.1	Csa6G518150.1	0
33- 40:	Csa1G076100.1	Csa6G518170.1	2e-88
33- 41:	Csa1G076600.1	Csa6G518310.1	6e-145
## Alignment 34: score=287.0 e_value=4.4e-11 N=7 Chr1&Chr6 plus
34- 0:	Csa1G524760.1	Csa6G008720.1	1e-110
34- 1:	Csa1G525310.1	Csa6G008850.1	1e-53
34- 2:	Csa1G526840.1	Csa6G009390.1	8e-109
34- 3:	Csa1G527920.1	Csa6G009420.1	2e-49
34- 4:	Csa1G528530.1	Csa6G009490.1	0
34- 5:	Csa1G531180.1	Csa6G011650.1	0
34- 6:	Csa1G531700.1	Csa6G011680.1	5e-150
## Alignment 35: score=1045.0 e_value=2.2e-70 N=24 Chr1&Chr6 minus
35- 0:	Csa1G435720.1	Csa6G523460.1	9e-25
35- 1:	Csa1G435760.1	Csa6G523440.1	0
35- 2:	Csa1G436330.1	Csa6G523410.1	0
35- 3:	Csa1G439830.1	Csa6G523390.1	7e-149
35- 4:	Csa1G448420.1	Csa6G522810.1	2e-56
35- 5:	Csa1G448990.1	Csa6G522120.1	3e-112
35- 6:	Csa1G459490.1	Csa6G521610.1	7e-67
35- 7:	Csa1G462020.1	Csa6G521090.1	1e-91
35- 8:	Csa1G462030.1	Csa6G521030.1	2e-42
35- 9:	Csa1G464560.1	Csa6G520440.1	2e-24
35- 10:	Csa1G467090.1	Csa6G520420.1	0
35- 11:	Csa1G467100.1	Csa6G520410.1	4e-99
35- 12:	Csa1G467710.1	Csa6G520300.1	5e-138
35- 13:	Csa1G469730.1	Csa6G519720.1	5e-146
35- 14:	Csa1G470240.1	Csa6G519700.1	2e-42
35- 15:	Csa1G470280.1	Csa6G519690.1	0
35- 16:	Csa1G470310.1	Csa6G519680.1	4e-131
35- 17:	Csa1G470420.1	Csa6G519640.1	0
35- 18:	Csa1G470430.1	Csa6G519630.1	3e-59
35- 19:	Csa1G471460.1	Csa6G519600.1	8e-68
35- 20:	Csa1G475990.1	Csa6G519570.1	5e-53
35- 21:	Csa1G478040.1	Csa6G519530.1	7e-111
35- 22:	Csa1G478060.1	Csa6G519500.1	0
35- 23:	Csa1G478590.1	Csa6G518370.1	6e-85
## Alignment 36: score=365.0 e_value=4.8e-15 N=8 Chr1&Chr6 minus
36- 0:	Csa1G505950.2	Csa6G191030.1	3e-53
36- 1:	Csa1G505960.1	Csa6G191020.1	0
36- 2:	Csa1G522520.1	Csa6G190370.1	0
36- 3:	Csa1G522540.1	Csa6G190340.1	2e-166
36- 4:	Csa1G523070.1	Csa6G190330.1	9e-69
36- 5:	Csa1G523110.1	Csa6G190310.1	5e-136
36- 6:	Csa1G523610.1	Csa6G190300.1	0
36- 7:	Csa1G524660.1	Csa6G190220.1	2e-85
## Alignment 37: score=276.0 e_value=1.9e-13 N=7 Chr1&Chr6 minus
37- 0:	Csa1G168910.1	Csa6G512880.1	2e-11
37- 1:	Csa1G171070.1	Csa6G511640.1	3e-99
37- 2:	Csa1G172590.1	Csa6G511040.1	2e-29
37- 3:	Csa1G173710.1	Csa6G511000.1	1e-27
37- 4:	Csa1G175720.1	Csa6G510960.1	8e-51
37- 5:	Csa1G175730.1	Csa6G510950.1	0
37- 6:	Csa1G179740.1	Csa6G510320.2	0
## Alignment 38: score=270.0 e_value=3.4e-09 N=6 Chr1&Chr6 minus
38- 0:	Csa1G537470.1	Csa6G525660.1	7e-77
38- 1:	Csa1G537530.1	Csa6G525630.1	8e-30
38- 2:	Csa1G537570.1	Csa6G525550.1	3e-88
38- 3:	Csa1G538210.1	Csa6G525480.1	4e-22
38- 4:	Csa1G538220.1	Csa6G525470.1	8e-147
38- 5:	Csa1G538230.1	Csa6G525430.1	0
## Alignment 39: score=261.0 e_value=1.1e-08 N=6 Chr1&Chr6 minus
39- 0:	Csa1G051590.1	Csa6G094760.1	2e-52
39- 1:	Csa1G051620.1	Csa6G094150.1	8e-42
39- 2:	Csa1G051640.1	Csa6G094140.1	7e-09
39- 3:	Csa1G051690.1	Csa6G092560.1	2e-32
39- 4:	Csa1G051710.1	Csa6G092510.1	6e-87
39- 5:	Csa1G051750.1	Csa6G091900.1	0
## Alignment 40: score=261.0 e_value=2.8e-10 N=6 Chr1&Chr6 minus
40- 0:	Csa1G077740.1	Csa6G301000.1	0
40- 1:	Csa1G085890.1	Csa6G292430.1	0
40- 2:	Csa1G088460.1	Csa6G290800.1	4e-159
40- 3:	Csa1G089490.1	Csa6G290280.1	3e-157
40- 4:	Csa1G089500.1	Csa6G290270.1	1e-144
40- 5:	Csa1G089510.1	Csa6G289740.1	2e-63
## Alignment 41: score=452.0 e_value=4.8e-25 N=11 Chr1&Chr7 plus
41- 0:	Csa1G064670.1	Csa7G044240.1	0
41- 1:	Csa1G065400.1	Csa7G044840.1	3e-24
41- 2:	Csa1G066520.1	Csa7G044950.1	8e-83
41- 3:	Csa1G070600.1	Csa7G045510.1	6e-22
41- 4:	Csa1G071130.1	Csa7G045520.1	3e-62
41- 5:	Csa1G071280.1	Csa7G045580.1	6e-35
41- 6:	Csa1G071840.1	Csa7G046120.1	1e-78
41- 7:	Csa1G071850.1	Csa7G046140.1	2e-09
41- 8:	Csa1G071890.1	Csa7G046710.1	0
41- 9:	Csa1G072990.1	Csa7G047270.1	1e-10
41- 10:	Csa1G073000.1	Csa7G047290.1	8e-50
## Alignment 42: score=271.0 e_value=7e-10 N=6 Chr1&Chr7 plus
42- 0:	Csa1G073780.1	Csa7G047430.1	3e-84
42- 1:	Csa1G073810.1	Csa7G047460.1	9e-36
42- 2:	Csa1G073890.1	Csa7G048050.1	0
42- 3:	Csa1G073900.1	Csa7G048060.1	9e-86
42- 4:	Csa1G074400.1	Csa7G048070.1	3e-23
42- 5:	Csa1G075030.1	Csa7G049230.1	3e-29
## Alignment 43: score=651.0 e_value=3.7e-37 N=15 Chr1&Chr7 minus
43- 0:	Csa1G586800.1	Csa7G451920.1	5e-107
43- 1:	Csa1G587410.1	Csa7G451400.1	5e-47
43- 2:	Csa1G587470.1	Csa7G451380.1	8e-06
43- 3:	Csa1G588530.1	Csa7G451330.1	0
43- 4:	Csa1G589660.1	Csa7G450720.1	1e-38
43- 5:	Csa1G590250.1	Csa7G450660.1	8e-21
43- 6:	Csa1G595810.1	Csa7G450570.1	4e-124
43- 7:	Csa1G595820.1	Csa7G450560.1	7e-22
43- 8:	Csa1G596420.1	Csa7G450510.1	5e-98
43- 9:	Csa1G597020.1	Csa7G449430.1	5e-154
43- 10:	Csa1G597040.1	Csa7G448910.1	0
43- 11:	Csa1G597090.1	Csa7G448890.1	6e-38
43- 12:	Csa1G597110.1	Csa7G448860.1	0
43- 13:	Csa1G597130.1	Csa7G448840.1	2e-43
43- 14:	Csa1G597690.1	Csa7G448810.1	5e-17
## Alignment 44: score=323.0 e_value=2.6e-14 N=8 Chr1&Chr7 minus
44- 0:	Csa1G602030.1	Csa7G430130.1	1e-44
44- 1:	Csa1G605100.1	Csa7G429550.1	7e-50
44- 2:	Csa1G605110.1	Csa7G429540.1	9e-31
44- 3:	Csa1G605710.1	Csa7G429500.1	1e-155
44- 4:	Csa1G611270.1	Csa7G428990.1	0
44- 5:	Csa1G612950.1	Csa7G428890.1	4e-66
44- 6:	Csa1G613510.1	Csa7G428820.2	1e-68
44- 7:	Csa1G613580.1	Csa7G428130.1	7e-51
## Alignment 45: score=302.0 e_value=4.5e-12 N=7 Chr1&Chr7 minus
45- 0:	Csa1G467060.1	Csa7G049190.1	2e-135
45- 1:	Csa1G469730.1	Csa7G049180.1	4e-129
45- 2:	Csa1G469740.1	Csa7G049170.1	7e-52
45- 3:	Csa1G470240.1	Csa7G049160.1	2e-36
45- 4:	Csa1G470450.1	Csa7G048630.1	3e-47
45- 5:	Csa1G472480.1	Csa7G048620.1	1e-62
45- 6:	Csa1G476010.1	Csa7G048100.1	4e-38
## Alignment 46: score=278.0 e_value=1.3e-08 N=6 Chr1&Chr7 minus
46- 0:	Csa1G305720.3	Csa7G433350.1	8e-18
46- 1:	Csa1G305720.1	Csa7G433320.1	1e-13
46- 2:	Csa1G305780.1	Csa7G433290.1	6e-70
46- 3:	Csa1G306810.1	Csa7G433230.1	1e-32
46- 4:	Csa1G308810.1	Csa7G433180.1	4e-10
46- 5:	Csa1G313810.1	Csa7G433150.1	4e-23
## Alignment 47: score=322.0 e_value=7e-14 N=8 Chr2&Chr2 plus
47- 0:	Csa2G005870.1	Csa2G379260.1	0
47- 1:	Csa2G005890.1	Csa2G379370.1	0
47- 2:	Csa2G005990.1	Csa2G379920.1	1e-52
47- 3:	Csa2G006080.1	Csa2G380050.1	7e-31
47- 4:	Csa2G006180.1	Csa2G381690.1	0
47- 5:	Csa2G006290.1	Csa2G381750.1	9e-23
47- 6:	Csa2G006790.1	Csa2G381760.1	0
47- 7:	Csa2G007390.1	Csa2G381810.1	7e-64
## Alignment 48: score=1922.0 e_value=2.1e-151 N=43 Chr2&Chr3 plus
48- 0:	Csa2G155600.1	Csa3G133180.1	0
48- 1:	Csa2G162150.1	Csa3G133260.1	0
48- 2:	Csa2G167190.1	Csa3G133950.1	0
48- 3:	Csa2G169770.1	Csa3G134010.1	2e-51
48- 4:	Csa2G170820.1	Csa3G134550.1	2e-88
48- 5:	Csa2G171830.1	Csa3G134630.1	7e-38
48- 6:	Csa2G171840.1	Csa3G134650.1	1e-12
48- 7:	Csa2G171850.1	Csa3G134670.1	1e-95
48- 8:	Csa2G171900.1	Csa3G134710.1	4e-61
48- 9:	Csa2G172510.1	Csa3G134750.1	0
48- 10:	Csa2G173040.1	Csa3G134830.1	2e-26
48- 11:	Csa2G173070.1	Csa3G134920.1	4e-85
48- 12:	Csa2G174100.1	Csa3G134960.1	0
48- 13:	Csa2G174140.1	Csa3G134990.1	7e-169
48- 14:	Csa2G174670.1	Csa3G135050.1	2e-49
48- 15:	Csa2G175170.1	Csa3G135080.1	0
48- 16:	Csa2G177210.1	Csa3G135120.1	1e-77
48- 17:	Csa2G177220.1	Csa3G135620.1	3e-29
48- 18:	Csa2G178720.1	Csa3G135640.1	2e-88
48- 19:	Csa2G179230.1	Csa3G135670.1	1e-64
48- 20:	Csa2G179730.1	Csa3G135680.1	2e-126
48- 21:	Csa2G185730.1	Csa3G135760.1	4e-26
48- 22:	Csa2G190740.1	Csa3G141830.1	4e-20
48- 23:	Csa2G190760.1	Csa3G141840.1	1e-79
48- 24:	Csa2G190770.1	Csa3G141860.1	3e-18
48- 25:	Csa2G190780.1	Csa3G141870.1	1e-18
48- 26:	Csa2G191300.1	Csa3G143510.1	0
48- 27:	Csa2G193310.1	Csa3G143520.1	6e-92
48- 28:	Csa2G193330.1	Csa3G143540.2	3e-44
48- 29:	Csa2G200420.1	Csa3G143570.1	2e-123
48- 30:	Csa2G200440.1	Csa3G143580.1	8e-81
48- 31:	Csa2G205940.1	Csa3G144130.1	0
48- 32:	Csa2G211450.1	Csa3G144170.1	5e-178
48- 33:	Csa2G215490.1	Csa3G144190.1	1e-42
48- 34:	Csa2G215510.1	Csa3G144210.1	1e-57
48- 35:	Csa2G215520.1	Csa3G144230.1	0
48- 36:	Csa2G222050.1	Csa3G146300.1	1e-90
48- 37:	Csa2G222070.1	Csa3G146310.1	2e-28
48- 38:	Csa2G222110.1	Csa3G146320.1	3e-137
48- 39:	Csa2G222130.1	Csa3G146330.1	6e-125
48- 40:	Csa2G223140.1	Csa3G146360.1	0
48- 41:	Csa2G223670.1	Csa3G146390.1	2e-127
48- 42:	Csa2G223710.1	Csa3G146450.1	0
## Alignment 49: score=1335.0 e_value=7.1e-96 N=30 Chr2&Chr3 plus
49- 0:	Csa2G360730.1	Csa3G852510.1	1e-20
49- 1:	Csa2G360740.1	Csa3G852530.1	6e-42
49- 2:	Csa2G360750.1	Csa3G854190.1	7e-178
49- 3:	Csa2G360840.1	Csa3G854760.1	0
49- 4:	Csa2G361400.1	Csa3G855270.1	4e-138
49- 5:	Csa2G361590.1	Csa3G855960.1	1e-110
49- 6:	Csa2G361640.1	Csa3G857030.1	1e-37
49- 7:	Csa2G361680.1	Csa3G857050.1	0
49- 8:	Csa2G361710.1	Csa3G857080.1	1e-31
49- 9:	Csa2G361750.1	Csa3G859670.1	1e-37
49- 10:	Csa2G361850.1	Csa3G860230.1	0
49- 11:	Csa2G361860.1	Csa3G860270.1	3e-45
49- 12:	Csa2G361880.1	Csa3G860290.1	8e-134
49- 13:	Csa2G362390.1	Csa3G860320.1	3e-42
49- 14:	Csa2G362490.1	Csa3G865340.1	4e-39
49- 15:	Csa2G363010.1	Csa3G865380.1	8e-59
49- 16:	Csa2G363030.1	Csa3G865390.1	0
49- 17:	Csa2G364580.1	Csa3G865400.1	9e-80
49- 18:	Csa2G365680.1	Csa3G865940.1	0
49- 19:	Csa2G366200.1	Csa3G866460.1	8e-170
49- 20:	Csa2G366710.1	Csa3G872040.1	1e-35
49- 21:	Csa2G367210.1	Csa3G872060.1	1e-114
49- 22:	Csa2G367230.1	Csa3G872100.1	2e-71
49- 23:	Csa2G368240.1	Csa3G872120.1	3e-13
49- 24:	Csa2G368250.1	Csa3G872130.1	1e-23
49- 25:	Csa2G368260.1	Csa3G872160.1	1e-29
49- 26:	Csa2G368280.1	Csa3G872180.1	4e-154
49- 27:	Csa2G368790.1	Csa3G872190.1	4e-98
49- 28:	Csa2G368800.1	Csa3G872200.1	2e-15
49- 29:	Csa2G368850.1	Csa3G872740.1	5e-150
## Alignment 50: score=474.0 e_value=5.2e-21 N=10 Chr2&Chr3 plus
50- 0:	Csa2G368950.1	Csa3G889710.1	3e-138
50- 1:	Csa2G368990.1	Csa3G889750.1	1e-47
50- 2:	Csa2G369000.1	Csa3G889770.1	1e-106
50- 3:	Csa2G369030.1	Csa3G889790.1	0
50- 4:	Csa2G369070.1	Csa3G889810.1	2e-176
50- 5:	Csa2G369080.1	Csa3G889820.1	4e-68
50- 6:	Csa2G369140.1	Csa3G889870.1	1e-07
50- 7:	Csa2G369150.1	Csa3G889930.1	6e-51
50- 8:	Csa2G369160.1	Csa3G889950.1	3e-06
50- 9:	Csa2G369210.1	Csa3G889960.1	9e-88
## Alignment 51: score=328.0 e_value=2.8e-15 N=8 Chr2&Chr3 plus
51- 0:	Csa2G010120.1	Csa3G141840.1	2e-91
51- 1:	Csa2G010240.1	Csa3G142990.1	1e-38
51- 2:	Csa2G010300.1	Csa3G143550.1	6e-40
51- 3:	Csa2G010320.1	Csa3G143560.1	2e-34
51- 4:	Csa2G010920.1	Csa3G143570.1	4e-89
51- 5:	Csa2G011420.1	Csa3G143580.1	8e-85
51- 6:	Csa2G011480.1	Csa3G144210.1	1e-68
51- 7:	Csa2G011550.1	Csa3G146330.1	8e-32
## Alignment 52: score=314.0 e_value=3e-13 N=7 Chr2&Chr3 plus
52- 0:	Csa2G224290.1	Csa3G143550.1	3e-39
52- 1:	Csa2G224300.1	Csa3G143560.1	7e-37
52- 2:	Csa2G225320.1	Csa3G143570.1	1e-54
52- 3:	Csa2G225340.1	Csa3G144170.1	5e-137
52- 4:	Csa2G228360.1	Csa3G144190.1	2e-29
52- 5:	Csa2G228380.1	Csa3G144210.1	6e-68
52- 6:	Csa2G228420.1	Csa3G146290.1	4e-104
## Alignment 53: score=308.0 e_value=2.4e-13 N=8 Chr2&Chr3 plus
53- 0:	Csa2G370470.1	Csa3G891670.1	7e-104
53- 1:	Csa2G370550.1	Csa3G893290.1	3e-09
53- 2:	Csa2G372710.1	Csa3G893390.1	8e-89
53- 3:	Csa2G372790.1	Csa3G893950.1	0
53- 4:	Csa2G373460.1	Csa3G895120.1	3e-16
53- 5:	Csa2G374590.1	Csa3G895680.1	3e-65
53- 6:	Csa2G375180.1	Csa3G895750.1	2e-60
53- 7:	Csa2G375200.1	Csa3G895780.1	0
## Alignment 54: score=260.0 e_value=3.1e-08 N=6 Chr2&Chr3 plus
54- 0:	Csa2G174100.1	Csa3G374210.1	0
54- 1:	Csa2G174130.1	Csa3G384800.1	4e-135
54- 2:	Csa2G174670.1	Csa3G386830.1	4e-51
54- 3:	Csa2G175170.1	Csa3G389840.1	4e-71
54- 4:	Csa2G177210.1	Csa3G389850.1	2e-52
54- 5:	Csa2G178720.1	Csa3G393910.1	1e-66
## Alignment 55: score=849.0 e_value=1.7e-54 N=19 Chr2&Chr3 minus
55- 0:	Csa2G375240.1	Csa3G889150.1	0
55- 1:	Csa2G376800.1	Csa3G888540.1	9e-137
55- 2:	Csa2G376840.1	Csa3G888520.1	3e-102
55- 3:	Csa2G377350.1	Csa3G882980.1	2e-52
55- 4:	Csa2G377370.1	Csa3G882970.1	2e-114
55- 5:	Csa2G377880.1	Csa3G882950.1	9e-63
55- 6:	Csa2G377890.1	Csa3G882940.1	8e-137
55- 7:	Csa2G377920.1	Csa3G882930.1	0
55- 8:	Csa2G377970.1	Csa3G881860.1	7e-44
55- 9:	Csa2G378010.1	Csa3G881840.1	1e-71
55- 10:	Csa2G378510.1	Csa3G881820.1	7e-158
55- 11:	Csa2G378530.1	Csa3G881800.1	3e-92
55- 12:	Csa2G379080.1	Csa3G881700.1	7e-50
55- 13:	Csa2G379090.1	Csa3G881690.1	1e-67
55- 14:	Csa2G379200.1	Csa3G880550.1	2e-75
55- 15:	Csa2G379270.1	Csa3G878930.1	2e-138
55- 16:	Csa2G379290.3	Csa3G878900.2	7e-73
55- 17:	Csa2G379360.1	Csa3G878890.1	4e-13
55- 18:	Csa2G379870.1	Csa3G878880.1	3e-105
## Alignment 56: score=359.0 e_value=9.2e-15 N=8 Chr2&Chr3 minus
56- 0:	Csa2G006180.1	Csa3G878750.1	0
56- 1:	Csa2G006240.1	Csa3G878740.1	1e-33
56- 2:	Csa2G006260.1	Csa3G878720.1	1e-19
56- 3:	Csa2G006270.1	Csa3G878210.1	5e-71
56- 4:	Csa2G006790.1	Csa3G878200.1	0
56- 5:	Csa2G007390.1	Csa3G878170.1	2e-65
56- 6:	Csa2G007950.1	Csa3G877640.1	5e-161
56- 7:	Csa2G008060.1	Csa3G876030.1	0
## Alignment 57: score=333.0 e_value=3.6e-11 N=7 Chr2&Chr3 minus
57- 0:	Csa2G381650.1	Csa3G878800.1	6e-45
57- 1:	Csa2G381660.1	Csa3G878770.1	0
57- 2:	Csa2G381690.1	Csa3G878750.1	0
57- 3:	Csa2G381760.1	Csa3G878200.1	0
57- 4:	Csa2G381790.1	Csa3G878180.1	0
57- 5:	Csa2G381810.1	Csa3G878170.1	2e-62
57- 6:	Csa2G381840.1	Csa3G877650.1	4e-33
## Alignment 58: score=275.0 e_value=4.6e-09 N=6 Chr2&Chr3 minus
58- 0:	Csa2G170820.1	Csa3G610800.1	5e-54
58- 1:	Csa2G171840.1	Csa3G610280.1	9e-89
58- 2:	Csa2G171870.1	Csa3G608730.1	4e-98
58- 3:	Csa2G171920.1	Csa3G608680.1	4e-16
58- 4:	Csa2G171930.1	Csa3G608180.1	1e-146
58- 5:	Csa2G172510.1	Csa3G608170.1	0
## Alignment 59: score=269.0 e_value=4.6e-10 N=6 Chr2&Chr3 minus
59- 0:	Csa2G370370.1	Csa3G892750.1	0
59- 1:	Csa2G370510.1	Csa3G891650.1	0
59- 2:	Csa2G370520.1	Csa3G891640.1	6e-56
59- 3:	Csa2G370580.1	Csa3G890120.1	1e-97
59- 4:	Csa2G372140.1	Csa3G890060.1	5e-58
59- 5:	Csa2G372150.1	Csa3G890040.1	3e-169
## Alignment 60: score=321.0 e_value=4.8e-11 N=7 Chr2&Chr4 plus
60- 0:	Csa2G006080.1	Csa4G004840.1	2e-33
60- 1:	Csa2G006150.1	Csa4G004920.1	4e-98
60- 2:	Csa2G006210.1	Csa4G004940.1	2e-60
60- 3:	Csa2G006270.1	Csa4G004960.1	2e-57
60- 4:	Csa2G006290.1	Csa4G004990.3	1e-16
60- 5:	Csa2G006830.1	Csa4G005520.1	4e-33
60- 6:	Csa2G006850.1	Csa4G005530.1	0
## Alignment 61: score=258.0 e_value=7.3e-09 N=6 Chr2&Chr4 plus
61- 0:	Csa2G354080.1	Csa4G000620.1	1e-05
61- 1:	Csa2G354620.1	Csa4G000650.1	1e-09
61- 2:	Csa2G354790.1	Csa4G000890.1	3e-55
61- 3:	Csa2G354840.1	Csa4G000970.1	4e-83
61- 4:	Csa2G354900.1	Csa4G001510.1	0
61- 5:	Csa2G354910.1	Csa4G001520.1	3e-30
## Alignment 62: score=1799.0 e_value=2.1e-137 N=40 Chr2&Chr4 minus
62- 0:	Csa2G351830.1	Csa4G645900.1	2e-95
62- 1:	Csa2G351840.1	Csa4G645890.1	2e-06
62- 2:	Csa2G352360.1	Csa4G645860.1	1e-07
62- 3:	Csa2G352420.1	Csa4G645850.1	4e-15
62- 4:	Csa2G352430.1	Csa4G645830.1	2e-124
62- 5:	Csa2G352940.1	Csa4G645320.1	5e-27
62- 6:	Csa2G353480.1	Csa4G645290.1	0
62- 7:	Csa2G353490.1	Csa4G645250.1	0
62- 8:	Csa2G353500.1	Csa4G645240.1	6e-53
62- 9:	Csa2G354000.1	Csa4G644740.1	0
62- 10:	Csa2G354050.1	Csa4G644670.1	2e-30
62- 11:	Csa2G354100.1	Csa4G644630.1	0
62- 12:	Csa2G354620.1	Csa4G643100.1	4e-18
62- 13:	Csa2G354680.1	Csa4G643070.1	2e-120
62- 14:	Csa2G354790.1	Csa4G642470.1	2e-59
62- 15:	Csa2G354820.1	Csa4G642460.1	2e-74
62- 16:	Csa2G354830.1	Csa4G642420.1	0
62- 17:	Csa2G354900.1	Csa4G642330.1	0
62- 18:	Csa2G354920.1	Csa4G642290.1	0
62- 19:	Csa2G354980.1	Csa4G642270.1	4e-140
62- 20:	Csa2G355000.1	Csa4G641730.1	1e-48
62- 21:	Csa2G355020.1	Csa4G641710.1	6e-59
62- 22:	Csa2G355030.1	Csa4G641690.1	8e-100
62- 23:	Csa2G356040.1	Csa4G641680.1	5e-58
62- 24:	Csa2G356070.1	Csa4G641660.1	2e-105
62- 25:	Csa2G356600.1	Csa4G641590.1	1e-62
62- 26:	Csa2G356690.1	Csa4G639930.1	2e-136
62- 27:	Csa2G357190.1	Csa4G639900.1	1e-45
62- 28:	Csa2G357200.1	Csa4G639850.2	0
62- 29:	Csa2G357280.1	Csa4G639800.1	0
62- 30:	Csa2G357320.1	Csa4G639770.1	0
62- 31:	Csa2G359930.1	Csa4G639740.1	1e-18
62- 32:	Csa2G359950.1	Csa4G639730.1	2e-18
62- 33:	Csa2G359970.1	Csa4G639220.1	4e-81
62- 34:	Csa2G360060.1	Csa4G639160.1	2e-103
62- 35:	Csa2G360590.1	Csa4G639100.1	4e-147
62- 36:	Csa2G360620.1	Csa4G638510.1	6e-91
62- 37:	Csa2G360670.1	Csa4G638460.1	7e-11
62- 38:	Csa2G360710.1	Csa4G638430.1	2e-142
62- 39:	Csa2G360850.1	Csa4G637750.1	5e-29
## Alignment 63: score=643.0 e_value=1.5e-34 N=14 Chr2&Chr4 minus
63- 0:	Csa2G382420.1	Csa4G652810.1	5e-53
63- 1:	Csa2G382490.1	Csa4G652730.1	9e-145
63- 2:	Csa2G382500.1	Csa4G652680.1	7e-61
63- 3:	Csa2G382510.1	Csa4G652670.1	2e-171
63- 4:	Csa2G382530.1	Csa4G652650.1	1e-31
63- 5:	Csa2G382540.1	Csa4G652640.1	9e-68
63- 6:	Csa2G382560.1	Csa4G652140.1	6e-79
63- 7:	Csa2G382570.1	Csa4G652130.1	5e-111
63- 8:	Csa2G382580.1	Csa4G652110.1	5e-22
63- 9:	Csa2G382620.1	Csa4G652060.1	0
63- 10:	Csa2G382650.1	Csa4G652000.1	8e-51
63- 11:	Csa2G382670.1	Csa4G651970.1	9e-105
63- 12:	Csa2G382820.1	Csa4G651740.1	7e-137
63- 13:	Csa2G383340.1	Csa4G650230.1	6e-35
## Alignment 64: score=911.0 e_value=2.2e-57 N=21 Chr2&Chr5 minus
64- 0:	Csa2G348280.1	Csa5G601490.1	9e-92
64- 1:	Csa2G348790.1	Csa5G601470.1	0
64- 2:	Csa2G348870.1	Csa5G600930.1	1e-58
64- 3:	Csa2G348920.1	Csa5G600390.1	2e-63
64- 4:	Csa2G348960.1	Csa5G600370.1	7e-125
64- 5:	Csa2G348990.1	Csa5G599810.1	0
64- 6:	Csa2G349000.1	Csa5G599300.1	0
64- 7:	Csa2G349020.1	Csa5G598730.1	0
64- 8:	Csa2G349080.1	Csa5G598630.1	5e-63
64- 9:	Csa2G349090.1	Csa5G598600.1	3e-64
64- 10:	Csa2G349590.1	Csa5G598050.1	0
64- 11:	Csa2G349650.1	Csa5G598010.1	2e-71
64- 12:	Csa2G349690.1	Csa5G593360.1	0
64- 13:	Csa2G350230.1	Csa5G592810.1	2e-54
64- 14:	Csa2G350250.1	Csa5G591790.1	6e-127
64- 15:	Csa2G350270.1	Csa5G591730.1	1e-69
64- 16:	Csa2G350320.1	Csa5G590220.1	1e-116
64- 17:	Csa2G350390.1	Csa5G590200.1	4e-78
64- 18:	Csa2G350480.1	Csa5G590100.1	0
64- 19:	Csa2G351020.1	Csa5G590030.1	0
64- 20:	Csa2G351550.1	Csa5G589890.1	9e-176
## Alignment 65: score=479.0 e_value=2.9e-23 N=11 Chr2&Chr6 plus
65- 0:	Csa2G361840.1	Csa6G504430.1	5e-145
65- 1:	Csa2G361860.1	Csa6G504510.1	2e-35
65- 2:	Csa2G362390.1	Csa6G504520.1	2e-26
65- 3:	Csa2G362490.1	Csa6G504620.1	1e-35
65- 4:	Csa2G363020.1	Csa6G504630.1	0
65- 5:	Csa2G364580.1	Csa6G504650.1	3e-79
65- 6:	Csa2G366700.1	Csa6G505290.1	9e-72
65- 7:	Csa2G366710.1	Csa6G505810.1	2e-35
65- 8:	Csa2G368250.1	Csa6G505890.1	1e-13
65- 9:	Csa2G368850.1	Csa6G506000.1	1e-96
65- 10:	Csa2G368860.1	Csa6G506010.1	3e-123
## Alignment 66: score=295.0 e_value=7.7e-13 N=7 Chr2&Chr6 plus
66- 0:	Csa2G416130.1	Csa6G513470.1	3e-146
66- 1:	Csa2G416770.1	Csa6G513560.1	8e-100
66- 2:	Csa2G416790.1	Csa6G513570.1	3e-90
66- 3:	Csa2G417830.1	Csa6G513690.1	4e-155
66- 4:	Csa2G418340.1	Csa6G513720.1	5e-13
66- 5:	Csa2G418850.1	Csa6G513740.1	0
66- 6:	Csa2G419960.1	Csa6G514870.1	0
## Alignment 67: score=277.0 e_value=4.3e-08 N=6 Chr2&Chr6 plus
67- 0:	Csa2G408410.3	Csa6G518070.1	4e-20
67- 1:	Csa2G408950.1	Csa6G518110.1	0
67- 2:	Csa2G408970.1	Csa6G518170.1	2e-78
67- 3:	Csa2G415500.1	Csa6G518200.1	1e-75
67- 4:	Csa2G415530.1	Csa6G518230.1	3e-144
67- 5:	Csa2G415560.1	Csa6G518280.1	3e-125
## Alignment 68: score=276.0 e_value=3.9e-09 N=6 Chr2&Chr6 plus
68- 0:	Csa2G263910.1	Csa6G505920.1	2e-89
68- 1:	Csa2G264570.1	Csa6G505950.1	3e-34
68- 2:	Csa2G264580.1	Csa6G505970.1	0
68- 3:	Csa2G264600.1	Csa6G506000.1	8e-100
68- 4:	Csa2G264610.1	Csa6G506010.1	7e-125
68- 5:	Csa2G270150.1	Csa6G507040.1	2e-31
## Alignment 69: score=274.0 e_value=4e-08 N=6 Chr2&Chr6 plus
69- 0:	Csa2G277000.1	Csa6G490880.1	6e-49
69- 1:	Csa2G277040.1	Csa6G490890.1	0
69- 2:	Csa2G278170.1	Csa6G490950.1	4e-134
69- 3:	Csa2G279190.1	Csa6G490980.1	1e-135
69- 4:	Csa2G279250.1	Csa6G491020.1	9e-139
69- 5:	Csa2G279260.1	Csa6G491030.1	4e-50
## Alignment 70: score=268.0 e_value=8.4e-09 N=6 Chr2&Chr6 plus
70- 0:	Csa2G370370.1	Csa6G497340.1	0
70- 1:	Csa2G370490.1	Csa6G498970.2	2e-32
70- 2:	Csa2G370540.1	Csa6G498990.1	0
70- 3:	Csa2G370550.1	Csa6G499000.1	6e-46
70- 4:	Csa2G370560.1	Csa6G499060.1	3e-21
70- 5:	Csa2G371110.1	Csa6G499090.1	0
## Alignment 71: score=252.0 e_value=9.1e-10 N=6 Chr2&Chr6 plus
71- 0:	Csa2G277080.1	Csa6G493330.1	3e-141
71- 1:	Csa2G277610.1	Csa6G493890.1	4e-152
71- 2:	Csa2G277620.1	Csa6G493900.1	8e-38
71- 3:	Csa2G277640.1	Csa6G494990.1	1e-17
71- 4:	Csa2G285340.1	Csa6G495620.1	0
71- 5:	Csa2G285350.1	Csa6G495670.1	1e-95
## Alignment 72: score=680.0 e_value=6.8e-41 N=16 Chr2&Chr6 minus
72- 0:	Csa2G368910.1	Csa6G500390.1	0
72- 1:	Csa2G368940.1	Csa6G499850.1	9e-121
72- 2:	Csa2G369040.1	Csa6G499800.1	0
72- 3:	Csa2G369060.1	Csa6G499750.1	7e-21
72- 4:	Csa2G369190.1	Csa6G499220.1	3e-42
72- 5:	Csa2G369210.1	Csa6G499190.1	1e-31
72- 6:	Csa2G369230.1	Csa6G499160.1	0
72- 7:	Csa2G369810.1	Csa6G499140.1	4e-98
72- 8:	Csa2G369820.1	Csa6G499130.1	3e-70
72- 9:	Csa2G370350.1	Csa6G499110.1	3e-101
72- 10:	Csa2G370490.1	Csa6G498970.2	2e-32
72- 11:	Csa2G372170.1	Csa6G497310.1	0
72- 12:	Csa2G372710.1	Csa6G497260.1	2e-81
72- 13:	Csa2G372720.1	Csa6G497220.1	2e-137
72- 14:	Csa2G372740.1	Csa6G497210.1	0
72- 15:	Csa2G372820.1	Csa6G497000.1	7e-23
## Alignment 73: score=490.0 e_value=2.5e-22 N=11 Chr2&Chr6 minus
73- 0:	Csa2G354850.1	Csa6G494970.1	0
73- 1:	Csa2G354860.1	Csa6G493920.1	0
73- 2:	Csa2G354890.1	Csa6G493860.1	0
73- 3:	Csa2G354910.1	Csa6G493840.1	3e-24
73- 4:	Csa2G355030.1	Csa6G491690.1	2e-99
73- 5:	Csa2G356070.1	Csa6G491640.1	2e-35
73- 6:	Csa2G356600.1	Csa6G491030.1	1e-47
73- 7:	Csa2G356640.1	Csa6G491000.1	5e-52
73- 8:	Csa2G356650.1	Csa6G490990.1	0
73- 9:	Csa2G356680.1	Csa6G490960.1	3e-120
73- 10:	Csa2G357200.1	Csa6G490900.1	2e-83
## Alignment 74: score=420.0 e_value=8.2e-16 N=9 Chr2&Chr6 minus
74- 0:	Csa2G352930.1	Csa6G496970.1	8e-176
74- 1:	Csa2G352940.1	Csa6G496960.1	3e-26
74- 2:	Csa2G353460.1	Csa6G496450.1	0
74- 3:	Csa2G354000.1	Csa6G496390.1	0
74- 4:	Csa2G354030.1	Csa6G496380.1	9e-132
74- 5:	Csa2G354050.1	Csa6G495860.1	5e-15
74- 6:	Csa2G354080.1	Csa6G495850.1	6e-09
74- 7:	Csa2G354110.1	Csa6G495800.1	1e-25
74- 8:	Csa2G354640.1	Csa6G495720.1	2e-80
## Alignment 75: score=397.0 e_value=0 N=9 Chr2&Chr6 minus
75- 0:	Csa2G295420.1	Csa6G487650.1	1e-101
75- 1:	Csa2G296070.1	Csa6G487640.1	5e-167
75- 2:	Csa2G296130.1	Csa6G487590.2	5e-105
75- 3:	Csa2G296130.2	Csa6G487590.1	5e-105
75- 4:	Csa2G297140.1	Csa6G487580.1	1e-45
75- 5:	Csa2G297180.1	Csa6G486960.1	2e-41
75- 6:	Csa2G297220.1	Csa6G486880.1	5e-59
75- 7:	Csa2G297240.1	Csa6G486810.1	0
75- 8:	Csa2G297760.1	Csa6G486790.1	4e-43
## Alignment 76: score=344.0 e_value=1.9e-15 N=8 Chr2&Chr6 minus
76- 0:	Csa2G360650.1	Csa6G490220.1	1e-175
76- 1:	Csa2G360720.1	Csa6G490030.1	6e-43
76- 2:	Csa2G360730.1	Csa6G489950.1	1e-16
76- 3:	Csa2G360770.1	Csa6G488880.1	0
76- 4:	Csa2G360830.1	Csa6G487710.1	3e-47
76- 5:	Csa2G360840.1	Csa6G487700.1	0
76- 6:	Csa2G360850.1	Csa6G487690.1	2e-85
76- 7:	Csa2G361350.1	Csa6G487670.1	7e-121
## Alignment 77: score=282.0 e_value=1.2e-08 N=6 Chr2&Chr6 minus
77- 0:	Csa2G301460.1	Csa6G485160.1	7e-15
77- 1:	Csa2G301470.1	Csa6G485150.1	2e-43
77- 2:	Csa2G301530.1	Csa6G484600.1	0
77- 3:	Csa2G301540.1	Csa6G484580.1	2e-57
77- 4:	Csa2G302050.1	Csa6G484020.1	4e-10
77- 5:	Csa2G302090.1	Csa6G484010.1	8e-118
## Alignment 78: score=1134.0 e_value=1.2e-80 N=26 Chr2&Chr7 plus
78- 0:	Csa2G247590.1	Csa7G000520.1	2e-13
78- 1:	Csa2G248130.1	Csa7G002520.1	8e-151
78- 2:	Csa2G249790.1	Csa7G004050.1	2e-170
78- 3:	Csa2G249900.1	Csa7G004120.1	0
78- 4:	Csa2G249910.1	Csa7G004160.1	0
78- 5:	Csa2G250430.1	Csa7G004690.1	9e-58
78- 6:	Csa2G250930.1	Csa7G004700.1	0
78- 7:	Csa2G252040.1	Csa7G006300.1	6e-172
78- 8:	Csa2G257100.1	Csa7G007930.1	6e-60
78- 9:	Csa2G258100.1	Csa7G008430.1	7e-43
78- 10:	Csa2G258610.1	Csa7G008980.1	2e-37
78- 11:	Csa2G258630.1	Csa7G008990.1	7e-34
78- 12:	Csa2G258800.1	Csa7G009100.1	5e-40
78- 13:	Csa2G263930.1	Csa7G009720.1	7e-116
78- 14:	Csa2G263940.1	Csa7G009730.1	4e-55
78- 15:	Csa2G263980.1	Csa7G009760.1	5e-125
78- 16:	Csa2G264010.1	Csa7G009770.1	0
78- 17:	Csa2G264590.1	Csa7G010800.1	0
78- 18:	Csa2G264630.1	Csa7G011800.1	2e-72
78- 19:	Csa2G270230.1	Csa7G011840.1	8e-146
78- 20:	Csa2G270780.1	Csa7G012380.1	4e-144
78- 21:	Csa2G270790.1	Csa7G012920.1	2e-51
78- 22:	Csa2G270810.1	Csa7G012930.1	1e-149
78- 23:	Csa2G270830.2	Csa7G014460.1	3e-06
78- 24:	Csa2G271380.1	Csa7G014550.1	0
78- 25:	Csa2G271400.1	Csa7G014560.1	2e-28
## Alignment 79: score=784.0 e_value=6.6e-48 N=18 Chr2&Chr7 plus
79- 0:	Csa2G406800.1	Csa7G037510.3	5e-93
79- 1:	Csa2G408950.1	Csa7G039200.1	0
79- 2:	Csa2G409480.1	Csa7G039240.1	4e-139
79- 3:	Csa2G415520.1	Csa7G039280.1	3e-106
79- 4:	Csa2G416070.1	Csa7G041360.1	4e-85
79- 5:	Csa2G416150.1	Csa7G041970.1	6e-91
79- 6:	Csa2G416170.1	Csa7G041990.1	2e-139
79- 7:	Csa2G416770.1	Csa7G043040.1	3e-123
79- 8:	Csa2G416780.1	Csa7G043060.1	1e-46
79- 9:	Csa2G418850.1	Csa7G043590.1	0
79- 10:	Csa2G418920.1	Csa7G044210.1	0
79- 11:	Csa2G419960.1	Csa7G044240.1	0
79- 12:	Csa2G420470.1	Csa7G044250.1	7e-06
79- 13:	Csa2G421020.1	Csa7G044780.1	2e-131
79- 14:	Csa2G422040.1	Csa7G044800.1	2e-121
79- 15:	Csa2G423560.1	Csa7G044810.1	3e-36
79- 16:	Csa2G423570.1	Csa7G044820.1	2e-153
79- 17:	Csa2G423630.1	Csa7G044950.1	4e-148
## Alignment 80: score=592.0 e_value=1.4e-36 N=15 Chr2&Chr7 plus
80- 0:	Csa2G354680.1	Csa7G071340.1	4e-104
80- 1:	Csa2G354790.1	Csa7G071410.1	2e-55
80- 2:	Csa2G354820.1	Csa7G071440.1	1e-46
80- 3:	Csa2G354830.1	Csa7G071450.1	3e-153
80- 4:	Csa2G354910.1	Csa7G071570.1	2e-18
80- 5:	Csa2G354980.1	Csa7G071600.1	1e-100
80- 6:	Csa2G356040.1	Csa7G071670.1	6e-55
80- 7:	Csa2G356070.1	Csa7G072880.1	4e-86
80- 8:	Csa2G356090.1	Csa7G073420.1	2e-110
80- 9:	Csa2G357210.1	Csa7G073570.1	3e-115
80- 10:	Csa2G357280.1	Csa7G073680.1	0
80- 11:	Csa2G359980.1	Csa7G073740.1	5e-79
80- 12:	Csa2G360640.1	Csa7G074850.1	1e-21
80- 13:	Csa2G360750.1	Csa7G075570.1	7e-162
80- 14:	Csa2G360780.1	Csa7G075590.1	4e-177
## Alignment 81: score=361.0 e_value=9.1e-18 N=9 Chr2&Chr7 plus
81- 0:	Csa2G363020.1	Csa7G004110.1	0
81- 1:	Csa2G363570.1	Csa7G004120.1	0
81- 2:	Csa2G364570.1	Csa7G004130.1	0
81- 3:	Csa2G365080.1	Csa7G004690.1	9e-60
81- 4:	Csa2G365120.1	Csa7G006260.1	0
81- 5:	Csa2G365700.1	Csa7G007860.1	6e-115
81- 6:	Csa2G366710.1	Csa7G008430.1	7e-34
81- 7:	Csa2G367230.1	Csa7G009160.1	4e-53
81- 8:	Csa2G368890.1	Csa7G011840.1	5e-160
## Alignment 82: score=353.0 e_value=8.5e-14 N=8 Chr2&Chr7 plus
82- 0:	Csa2G238830.1	Csa7G253710.1	1e-175
82- 1:	Csa2G245410.1	Csa7G253780.1	0
82- 2:	Csa2G245420.1	Csa7G258340.1	8e-175
82- 3:	Csa2G245430.1	Csa7G258850.1	0
82- 4:	Csa2G245470.1	Csa7G259360.1	2e-68
82- 5:	Csa2G245520.1	Csa7G267950.1	0
82- 6:	Csa2G246530.1	Csa7G267970.1	0
82- 7:	Csa2G246540.1	Csa7G270550.1	0
## Alignment 83: score=298.0 e_value=7.5e-11 N=7 Chr2&Chr7 plus
83- 0:	Csa2G010330.1	Csa7G378440.1	7e-33
83- 1:	Csa2G010920.1	Csa7G378520.1	4e-85
83- 2:	Csa2G011420.1	Csa7G378530.2	1e-66
83- 3:	Csa2G011450.1	Csa7G378570.1	1e-66
83- 4:	Csa2G011490.1	Csa7G379080.1	0
83- 5:	Csa2G011560.1	Csa7G387700.1	0
83- 6:	Csa2G011590.1	Csa7G388390.1	1e-115
## Alignment 84: score=333.0 e_value=8.2e-15 N=8 Chr2&Chr7 minus
84- 0:	Csa2G005370.1	Csa7G440560.1	3e-21
84- 1:	Csa2G006040.1	Csa7G433350.1	8e-54
84- 2:	Csa2G006080.1	Csa7G433230.1	4e-30
84- 3:	Csa2G006210.1	Csa7G433170.1	2e-55
84- 4:	Csa2G006290.1	Csa7G432580.1	9e-32
84- 5:	Csa2G006810.1	Csa7G432550.1	4e-36
84- 6:	Csa2G006830.1	Csa7G432540.1	2e-30
84- 7:	Csa2G006880.1	Csa7G432500.1	1e-30
## Alignment 85: score=291.0 e_value=9.3e-08 N=6 Chr2&Chr7 minus
85- 0:	Csa2G382500.1	Csa7G432100.1	8e-24
85- 1:	Csa2G382510.1	Csa7G432090.1	9e-176
85- 2:	Csa2G382540.1	Csa7G432080.1	2e-55
85- 3:	Csa2G382570.1	Csa7G432070.1	1e-84
85- 4:	Csa2G382580.1	Csa7G432050.1	1e-20
85- 5:	Csa2G382630.1	Csa7G432020.1	4e-94
## Alignment 86: score=289.0 e_value=1.7e-11 N=7 Chr2&Chr7 minus
86- 0:	Csa2G379270.1	Csa7G435540.1	3e-116
86- 1:	Csa2G379300.1	Csa7G434970.1	7e-107
86- 2:	Csa2G379370.1	Csa7G433950.1	0
86- 3:	Csa2G380050.1	Csa7G433230.1	1e-51
86- 4:	Csa2G381640.1	Csa7G433200.1	3e-47
86- 5:	Csa2G381740.1	Csa7G432600.1	0
86- 6:	Csa2G381750.1	Csa7G432580.1	4e-43
## Alignment 87: score=1277.0 e_value=3.7e-84 N=28 Chr3&Chr3 plus
87- 0:	Csa3G006770.1	Csa3G895950.1	8e-153
87- 1:	Csa3G008310.1	Csa3G901000.1	3e-106
87- 2:	Csa3G008330.1	Csa3G901010.1	4e-71
87- 3:	Csa3G008830.1	Csa3G901020.1	0
87- 4:	Csa3G008880.1	Csa3G901040.1	2e-51
87- 5:	Csa3G009450.1	Csa3G901120.1	8e-172
87- 6:	Csa3G009500.1	Csa3G901690.1	9e-132
87- 7:	Csa3G009510.1	Csa3G902190.1	2e-108
87- 8:	Csa3G011600.1	Csa3G902260.1	2e-171
87- 9:	Csa3G011620.1	Csa3G902270.1	0
87- 10:	Csa3G011640.1	Csa3G902300.1	1e-92
87- 11:	Csa3G011650.1	Csa3G902310.1	1e-105
87- 12:	Csa3G011660.2	Csa3G902330.1	2e-167
87- 13:	Csa3G011720.1	Csa3G902370.1	9e-112
87- 14:	Csa3G011730.1	Csa3G902390.1	5e-95
87- 15:	Csa3G011750.1	Csa3G902400.1	3e-43
87- 16:	Csa3G011780.1	Csa3G902960.1	3e-11
87- 17:	Csa3G011850.1	Csa3G903510.1	2e-107
87- 18:	Csa3G015360.1	Csa3G903560.1	7e-33
87- 19:	Csa3G015860.1	Csa3G904070.1	0
87- 20:	Csa3G015880.1	Csa3G904100.1	0
87- 21:	Csa3G016400.1	Csa3G904140.1	7e-177
87- 22:	Csa3G016980.1	Csa3G911260.1	2e-117
87- 23:	Csa3G016990.1	Csa3G911280.1	2e-31
87- 24:	Csa3G017030.1	Csa3G912320.1	8e-151
87- 25:	Csa3G017070.1	Csa3G912380.1	3e-128
87- 26:	Csa3G017200.1	Csa3G912920.1	0
87- 27:	Csa3G017260.1	Csa3G913980.1	6e-147
## Alignment 88: score=306.0 e_value=2.7e-11 N=7 Chr3&Chr3 plus
88- 0:	Csa3G134890.1	Csa3G374200.1	4e-28
88- 1:	Csa3G134960.1	Csa3G374210.1	0
88- 2:	Csa3G134980.1	Csa3G383760.1	6e-74
88- 3:	Csa3G135050.1	Csa3G386830.1	1e-48
88- 4:	Csa3G135080.1	Csa3G389840.1	1e-75
88- 5:	Csa3G135120.1	Csa3G389850.1	7e-57
88- 6:	Csa3G135640.1	Csa3G393910.1	2e-68
## Alignment 89: score=295.0 e_value=5.4e-11 N=7 Chr3&Chr3 plus
89- 0:	Csa3G127050.1	Csa3G902390.1	1e-105
89- 1:	Csa3G127130.1	Csa3G903510.1	2e-111
89- 2:	Csa3G127170.1	Csa3G904070.1	0
89- 3:	Csa3G127820.1	Csa3G910680.1	0
89- 4:	Csa3G128870.1	Csa3G910710.1	5e-26
89- 5:	Csa3G128930.1	Csa3G911280.1	6e-22
89- 6:	Csa3G128960.1	Csa3G912320.1	1e-167
## Alignment 90: score=281.0 e_value=5.2e-11 N=7 Chr3&Chr3 plus
90- 0:	Csa3G011730.1	Csa3G127050.1	1e-98
90- 1:	Csa3G011850.1	Csa3G127130.1	3e-135
90- 2:	Csa3G015860.1	Csa3G127170.1	0
90- 3:	Csa3G016940.1	Csa3G127240.1	1e-35
90- 4:	Csa3G016990.1	Csa3G128930.1	2e-30
90- 5:	Csa3G017030.1	Csa3G128960.1	7e-142
90- 6:	Csa3G017120.1	Csa3G129600.1	5e-141
## Alignment 91: score=291.0 e_value=7.2e-12 N=7 Chr3&Chr3 minus
91- 0:	Csa3G130280.1	Csa3G630240.1	2e-07
91- 1:	Csa3G131950.1	Csa3G627730.1	4e-66
91- 2:	Csa3G131960.1	Csa3G627700.1	7e-22
91- 3:	Csa3G132570.1	Csa3G625650.1	4e-139
91- 4:	Csa3G132580.1	Csa3G625630.1	5e-135
91- 5:	Csa3G133140.1	Csa3G624070.1	0
91- 6:	Csa3G133180.1	Csa3G624020.1	0
## Alignment 92: score=1107.0 e_value=2.6e-77 N=26 Chr3&Chr4 minus
92- 0:	Csa3G727970.1	Csa4G337270.1	8e-155
92- 1:	Csa3G728100.1	Csa4G334120.1	0
92- 2:	Csa3G728130.1	Csa4G333620.1	3e-16
92- 3:	Csa3G730160.1	Csa4G332100.1	8e-48
92- 4:	Csa3G730180.1	Csa4G331070.1	4e-95
92- 5:	Csa3G730200.1	Csa4G326550.1	0
92- 6:	Csa3G730770.1	Csa4G314480.1	0
92- 7:	Csa3G730850.1	Csa4G314420.1	2e-80
92- 8:	Csa3G730890.1	Csa4G312880.1	6e-93
92- 9:	Csa3G730980.1	Csa4G312240.1	0
92- 10:	Csa3G731010.1	Csa4G312230.1	8e-47
92- 11:	Csa3G731130.1	Csa4G310210.1	7e-66
92- 12:	Csa3G731720.1	Csa4G309180.1	0
92- 13:	Csa3G731730.1	Csa4G309170.1	7e-179
92- 14:	Csa3G731880.1	Csa4G308640.1	0
92- 15:	Csa3G732440.1	Csa4G308510.1	2e-15
92- 16:	Csa3G732470.1	Csa4G308490.1	0
92- 17:	Csa3G732490.1	Csa4G308480.1	0
92- 18:	Csa3G732510.1	Csa4G307960.1	0
92- 19:	Csa3G732650.1	Csa4G307390.1	0
92- 20:	Csa3G733190.1	Csa4G304840.1	0
92- 21:	Csa3G733250.1	Csa4G304230.1	4e-55
92- 22:	Csa3G733280.1	Csa4G303120.1	0
92- 23:	Csa3G733290.1	Csa4G303110.1	3e-33
92- 24:	Csa3G733300.1	Csa4G303040.1	1e-66
92- 25:	Csa3G733340.1	Csa4G297540.1	7e-119
## Alignment 93: score=1084.0 e_value=7.6e-72 N=24 Chr3&Chr4 minus
93- 0:	Csa3G733930.1	Csa4G296290.1	5e-10
93- 1:	Csa3G734030.1	Csa4G296230.1	0
93- 2:	Csa3G734140.1	Csa4G296180.1	2e-11
93- 3:	Csa3G734160.1	Csa4G296170.1	4e-19
93- 4:	Csa3G734170.1	Csa4G296140.1	5e-150
93- 5:	Csa3G734280.2	Csa4G295490.1	3e-38
93- 6:	Csa3G734290.1	Csa4G295480.1	0
93- 7:	Csa3G734310.1	Csa4G295460.1	5e-53
93- 8:	Csa3G734340.1	Csa4G295450.1	0
93- 9:	Csa3G734880.1	Csa4G294380.1	3e-88
93- 10:	Csa3G734950.1	Csa4G293850.1	1e-146
93- 11:	Csa3G734980.1	Csa4G293280.1	6e-105
93- 12:	Csa3G735000.1	Csa4G293270.1	3e-79
93- 13:	Csa3G735010.1	Csa4G293260.1	6e-43
93- 14:	Csa3G735030.1	Csa4G293250.1	5e-172
93- 15:	Csa3G735040.1	Csa4G293210.1	2e-37
93- 16:	Csa3G735050.1	Csa4G293170.1	0
93- 17:	Csa3G736570.1	Csa4G293120.1	1e-65
93- 18:	Csa3G736620.1	Csa4G293080.1	6e-19
93- 19:	Csa3G736650.1	Csa4G293070.1	2e-26
93- 20:	Csa3G736750.1	Csa4G292970.1	0
93- 21:	Csa3G736760.1	Csa4G292470.1	5e-136
93- 22:	Csa3G736850.1	Csa4G292460.2	1e-163
93- 23:	Csa3G736890.1	Csa4G292440.1	9e-47
## Alignment 94: score=342.0 e_value=4e-17 N=9 Chr3&Chr4 minus
94- 0:	Csa3G119510.1	Csa4G052710.1	1e-41
94- 1:	Csa3G119610.1	Csa4G051570.1	9e-58
94- 2:	Csa3G119700.1	Csa4G051470.1	2e-58
94- 3:	Csa3G119740.1	Csa4G051420.1	3e-110
94- 4:	Csa3G119860.1	Csa4G050850.1	4e-160
94- 5:	Csa3G121060.1	Csa4G050130.1	4e-47
94- 6:	Csa3G121580.1	Csa4G050120.1	7e-45
94- 7:	Csa3G121710.3	Csa4G049100.1	1e-06
94- 8:	Csa3G121790.1	Csa4G047920.1	7e-79
## Alignment 95: score=262.0 e_value=7.7e-08 N=6 Chr3&Chr4 minus
95- 0:	Csa3G859660.1	Csa4G046740.1	0
95- 1:	Csa3G859730.1	Csa4G046610.1	1e-81
95- 2:	Csa3G860250.1	Csa4G046070.1	1e-161
95- 3:	Csa3G860320.1	Csa4G045060.1	5e-33
95- 4:	Csa3G865330.1	Csa4G044980.1	3e-79
95- 5:	Csa3G865400.1	Csa4G043960.1	1e-46
## Alignment 96: score=403.0 e_value=1.3e-18 N=9 Chr3&Chr5 plus
96- 0:	Csa3G124790.1	Csa5G155580.1	6e-06
96- 1:	Csa3G124800.1	Csa5G155590.1	0
96- 2:	Csa3G124870.1	Csa5G156170.1	6e-23
96- 3:	Csa3G125520.1	Csa5G157390.1	4e-12
96- 4:	Csa3G125560.1	Csa5G157410.1	0
96- 5:	Csa3G126060.1	Csa5G157420.1	4e-70
96- 6:	Csa3G126110.1	Csa5G157940.1	3e-91
96- 7:	Csa3G126160.1	Csa5G158530.1	1e-158
96- 8:	Csa3G126170.1	Csa5G158540.1	1e-83
## Alignment 97: score=307.0 e_value=6.8e-12 N=7 Chr3&Chr5 plus
97- 0:	Csa3G238090.1	Csa5G139150.1	0
97- 1:	Csa3G238150.1	Csa5G139210.1	8e-37
97- 2:	Csa3G239250.1	Csa5G139380.1	6e-14
97- 3:	Csa3G239280.1	Csa5G139390.1	1e-59
97- 4:	Csa3G239290.1	Csa5G139400.1	4e-171
97- 5:	Csa3G239880.1	Csa5G139430.1	0
97- 6:	Csa3G247880.1	Csa5G139450.1	4e-116
## Alignment 98: score=290.0 e_value=4.7e-11 N=7 Chr3&Chr5 plus
98- 0:	Csa3G120410.1	Csa5G151510.1	7e-12
98- 1:	Csa3G121020.1	Csa5G151610.1	4e-104
98- 2:	Csa3G121600.1	Csa5G152250.1	1e-30
98- 3:	Csa3G121750.1	Csa5G152910.1	3e-43
98- 4:	Csa3G121780.1	Csa5G152960.1	7e-45
98- 5:	Csa3G121800.1	Csa5G152970.1	1e-93
98- 6:	Csa3G122380.1	Csa5G153070.3	5e-15
## Alignment 99: score=254.0 e_value=5.6e-08 N=6 Chr3&Chr5 plus
99- 0:	Csa3G120390.1	Csa5G139630.1	7e-34
99- 1:	Csa3G120470.1	Csa5G139730.1	1e-62
99- 2:	Csa3G120510.1	Csa5G139850.1	1e-08
99- 3:	Csa3G121580.1	Csa5G139930.1	6e-40
99- 4:	Csa3G121640.1	Csa5G140460.1	1e-110
99- 5:	Csa3G121720.1	Csa5G140480.1	0
## Alignment 100: score=251.0 e_value=7.2e-08 N=6 Chr3&Chr5 plus
100- 0:	Csa3G118740.1	Csa5G139100.1	1e-27
100- 1:	Csa3G119260.1	Csa5G139160.2	3e-49
100- 2:	Csa3G119360.1	Csa5G139240.1	4e-35
100- 3:	Csa3G119470.1	Csa5G139360.1	3e-62
100- 4:	Csa3G119630.1	Csa5G139510.1	0
100- 5:	Csa3G119670.1	Csa5G139540.1	1e-102
## Alignment 101: score=838.0 e_value=2.6e-52 N=19 Chr3&Chr5 minus
101- 0:	Csa3G019970.1	Csa5G162040.1	8e-135
101- 1:	Csa3G019980.1	Csa5G162030.1	1e-61
101- 2:	Csa3G021150.1	Csa5G161880.1	2e-33
101- 3:	Csa3G026160.1	Csa5G161860.1	3e-36
101- 4:	Csa3G027200.1	Csa5G161310.1	9e-11
101- 5:	Csa3G027210.1	Csa5G161300.1	5e-26
101- 6:	Csa3G027720.1	Csa5G161290.1	0
101- 7:	Csa3G027730.1	Csa5G161280.1	0
101- 8:	Csa3G033230.1	Csa5G160770.1	2e-107
101- 9:	Csa3G033810.1	Csa5G160210.1	2e-77
101- 10:	Csa3G034810.1	Csa5G160180.1	3e-124
101- 11:	Csa3G035340.1	Csa5G160140.1	4e-30
101- 12:	Csa3G035890.1	Csa5G158550.1	4e-105
101- 13:	Csa3G036460.1	Csa5G158500.1	0
101- 14:	Csa3G036470.1	Csa5G158480.1	0
101- 15:	Csa3G036490.1	Csa5G157960.1	9e-73
101- 16:	Csa3G036540.1	Csa5G157930.1	0
101- 17:	Csa3G038170.1	Csa5G156210.1	1e-151
101- 18:	Csa3G038720.1	Csa5G155500.1	0
## Alignment 102: score=679.0 e_value=1.2e-39 N=16 Chr3&Chr5 minus
102- 0:	Csa3G175700.1	Csa5G160220.1	0
102- 1:	Csa3G175710.1	Csa5G160180.1	5e-134
102- 2:	Csa3G175740.1	Csa5G160140.1	1e-47
102- 3:	Csa3G176350.1	Csa5G158540.1	9e-15
102- 4:	Csa3G176860.1	Csa5G157940.1	1e-93
102- 5:	Csa3G177920.1	Csa5G157380.1	0
102- 6:	Csa3G178570.1	Csa5G156220.1	2e-37
102- 7:	Csa3G179160.1	Csa5G156170.1	8e-16
102- 8:	Csa3G180260.1	Csa5G155560.1	5e-39
102- 9:	Csa3G180310.1	Csa5G155540.1	0
102- 10:	Csa3G180400.1	Csa5G155510.1	2e-39
102- 11:	Csa3G180410.1	Csa5G155500.1	8e-163
102- 12:	Csa3G181940.1	Csa5G155480.1	1e-80
102- 13:	Csa3G181990.1	Csa5G154900.1	8e-15
102- 14:	Csa3G182080.1	Csa5G154830.1	4e-25
102- 15:	Csa3G182110.1	Csa5G154780.1	0
## Alignment 103: score=462.0 e_value=3.8e-23 N=11 Chr3&Chr5 minus
103- 0:	Csa3G824230.1	Csa5G638330.1	4e-137
103- 1:	Csa3G824900.1	Csa5G637730.1	2e-43
103- 2:	Csa3G824990.1	Csa5G637160.1	6e-82
103- 3:	Csa3G825010.1	Csa5G636620.1	2e-19
103- 4:	Csa3G825030.1	Csa5G636600.1	1e-10
103- 5:	Csa3G825050.1	Csa5G636520.1	9e-26
103- 6:	Csa3G826680.1	Csa5G636510.1	2e-93
103- 7:	Csa3G826700.1	Csa5G636480.1	3e-69
103- 8:	Csa3G827230.1	Csa5G635440.1	3e-116
103- 9:	Csa3G827930.1	Csa5G633290.1	2e-41
103- 10:	Csa3G828960.1	Csa5G633280.1	6e-130
## Alignment 104: score=411.0 e_value=2.1e-16 N=9 Chr3&Chr5 minus
104- 0:	Csa3G735030.1	Csa5G178700.1	8e-118
104- 1:	Csa3G735040.1	Csa5G177670.1	4e-52
104- 2:	Csa3G736630.1	Csa5G177060.1	0
104- 3:	Csa3G736660.1	Csa5G177050.1	8e-112
104- 4:	Csa3G736690.1	Csa5G176530.1	0
104- 5:	Csa3G736700.1	Csa5G176030.1	0
104- 6:	Csa3G736760.1	Csa5G175970.1	6e-76
104- 7:	Csa3G736780.1	Csa5G175930.1	1e-79
104- 8:	Csa3G736860.1	Csa5G175890.1	1e-22
## Alignment 105: score=398.0 e_value=1.1e-17 N=9 Chr3&Chr5 minus
105- 0:	Csa3G837040.1	Csa5G524820.1	3e-35
105- 1:	Csa3G837550.1	Csa5G524780.1	2e-107
105- 2:	Csa3G837570.1	Csa5G524750.1	7e-65
105- 3:	Csa3G837590.1	Csa5G524710.1	4e-133
105- 4:	Csa3G838790.1	Csa5G523090.1	5e-62
105- 5:	Csa3G839790.1	Csa5G523080.1	9e-79
105- 6:	Csa3G840370.1	Csa5G523030.1	1e-122
105- 7:	Csa3G840390.1	Csa5G523010.1	0
105- 8:	Csa3G840450.1	Csa5G522920.1	0
## Alignment 106: score=363.0 e_value=1.2e-17 N=9 Chr3&Chr5 minus
106- 0:	Csa3G733220.1	Csa5G190530.1	4e-36
106- 1:	Csa3G733250.1	Csa5G189920.1	9e-18
106- 2:	Csa3G733290.1	Csa5G188900.1	4e-09
106- 3:	Csa3G733960.1	Csa5G184270.1	5e-112
106- 4:	Csa3G733980.1	Csa5G183770.1	4e-21
106- 5:	Csa3G734090.1	Csa5G182680.1	7e-98
106- 6:	Csa3G734160.1	Csa5G182660.1	4e-13
106- 7:	Csa3G734310.1	Csa5G182030.1	3e-61
106- 8:	Csa3G734900.1	Csa5G181420.1	4e-45
## Alignment 107: score=305.0 e_value=1.5e-11 N=7 Chr3&Chr5 minus
107- 0:	Csa3G731100.1	Csa5G208460.1	0
107- 1:	Csa3G731160.1	Csa5G205920.1	5e-155
107- 2:	Csa3G731170.1	Csa5G204410.1	1e-66
107- 3:	Csa3G731190.1	Csa5G203410.1	1e-129
107- 4:	Csa3G731220.1	Csa5G202360.1	6e-107
107- 5:	Csa3G731880.1	Csa5G201310.1	0
107- 6:	Csa3G732480.1	Csa5G198240.1	1e-80
## Alignment 108: score=291.0 e_value=9.6e-11 N=7 Chr3&Chr5 minus
108- 0:	Csa3G829240.1	Csa5G603260.1	1e-86
108- 1:	Csa3G835780.1	Csa5G602730.1	5e-44
108- 2:	Csa3G835810.1	Csa5G602170.1	0
108- 3:	Csa3G836520.1	Csa5G601560.1	2e-124
108- 4:	Csa3G837590.1	Csa5G601490.1	2e-133
108- 5:	Csa3G838140.1	Csa5G600960.1	1e-109
108- 6:	Csa3G838690.1	Csa5G600370.1	3e-136
## Alignment 109: score=276.0 e_value=1.5e-09 N=6 Chr3&Chr5 minus
109- 0:	Csa3G829170.1	Csa5G631510.1	4e-92
109- 1:	Csa3G835270.1	Csa5G630920.1	2e-17
109- 2:	Csa3G835780.1	Csa5G630910.1	4e-36
109- 3:	Csa3G835800.1	Csa5G630850.1	4e-156
109- 4:	Csa3G835810.1	Csa5G630840.1	0
109- 5:	Csa3G835890.1	Csa5G630820.1	4e-65
## Alignment 110: score=1206.0 e_value=5.4e-83 N=27 Chr3&Chr6 plus
110- 0:	Csa3G736940.1	Csa6G439970.1	1e-26
110- 1:	Csa3G736950.1	Csa6G445000.1	1e-24
110- 2:	Csa3G736970.1	Csa6G445010.1	5e-152
110- 3:	Csa3G738980.1	Csa6G445020.1	4e-110
110- 4:	Csa3G739000.1	Csa6G445050.1	4e-51
110- 5:	Csa3G739030.1	Csa6G445120.1	4e-152
110- 6:	Csa3G739040.1	Csa6G445170.1	2e-115
110- 7:	Csa3G740090.1	Csa6G446310.1	0
110- 8:	Csa3G740120.1	Csa6G446380.1	4e-117
110- 9:	Csa3G740140.1	Csa6G446420.1	0
110- 10:	Csa3G740170.1	Csa6G446430.1	1e-115
110- 11:	Csa3G740220.1	Csa6G446470.1	1e-63
110- 12:	Csa3G742870.1	Csa6G446560.1	1e-95
110- 13:	Csa3G743400.1	Csa6G448110.1	9e-128
110- 14:	Csa3G743950.1	Csa6G448170.1	9e-86
110- 15:	Csa3G743980.1	Csa6G448690.1	5e-154
110- 16:	Csa3G746550.1	Csa6G448710.1	0
110- 17:	Csa3G748210.1	Csa6G449310.1	7e-90
110- 18:	Csa3G748220.1	Csa6G449320.1	1e-69
110- 19:	Csa3G748790.1	Csa6G450350.1	0
110- 20:	Csa3G748840.1	Csa6G450390.1	0
110- 21:	Csa3G749850.1	Csa6G450400.1	0
110- 22:	Csa3G750920.1	Csa6G450410.1	0
110- 23:	Csa3G751430.1	Csa6G450420.1	2e-58
110- 24:	Csa3G751450.1	Csa6G450430.1	4e-112
110- 25:	Csa3G751460.1	Csa6G450440.1	2e-67
110- 26:	Csa3G751990.1	Csa6G450940.1	0
## Alignment 111: score=941.0 e_value=7e-61 N=21 Chr3&Chr6 plus
111- 0:	Csa3G774710.1	Csa6G450940.1	3e-46
111- 1:	Csa3G775240.1	Csa6G451470.1	0
111- 2:	Csa3G775250.1	Csa6G451500.1	0
111- 3:	Csa3G775270.1	Csa6G451510.1	0
111- 4:	Csa3G775310.1	Csa6G452010.1	2e-120
111- 5:	Csa3G776350.1	Csa6G452100.1	5e-96
111- 6:	Csa3G776870.1	Csa6G452120.1	2e-37
111- 7:	Csa3G776890.1	Csa6G452630.1	0
111- 8:	Csa3G776900.1	Csa6G452640.1	3e-19
111- 9:	Csa3G776920.1	Csa6G452660.1	3e-45
111- 10:	Csa3G776980.1	Csa6G452670.1	3e-81
111- 11:	Csa3G777530.1	Csa6G452710.1	8e-36
111- 12:	Csa3G777660.1	Csa6G453800.1	1e-74
111- 13:	Csa3G778230.1	Csa6G454350.1	6e-159
111- 14:	Csa3G778270.1	Csa6G454360.1	1e-92
111- 15:	Csa3G778340.1	Csa6G454370.1	6e-47
111- 16:	Csa3G778360.1	Csa6G454380.1	4e-32
111- 17:	Csa3G778400.1	Csa6G454420.1	5e-25
111- 18:	Csa3G778960.1	Csa6G454460.1	6e-51
111- 19:	Csa3G780520.1	Csa6G454480.1	5e-19
111- 20:	Csa3G782680.1	Csa6G476680.1	1e-144
## Alignment 112: score=766.0 e_value=4e-48 N=18 Chr3&Chr6 plus
112- 0:	Csa3G124740.1	Csa6G074530.1	1e-138
112- 1:	Csa3G124750.1	Csa6G074550.1	0
112- 2:	Csa3G124890.1	Csa6G075210.1	0
112- 3:	Csa3G126060.1	Csa6G076820.1	8e-75
112- 4:	Csa3G126090.1	Csa6G076840.1	3e-69
112- 5:	Csa3G126170.1	Csa6G077420.1	5e-79
112- 6:	Csa3G126240.1	Csa6G077460.1	0
112- 7:	Csa3G126820.1	Csa6G078540.1	2e-84
112- 8:	Csa3G126840.1	Csa6G078570.1	1e-42
112- 9:	Csa3G127030.1	Csa6G078670.1	2e-84
112- 10:	Csa3G127050.1	Csa6G079180.1	6e-109
112- 11:	Csa3G127120.1	Csa6G079190.1	4e-154
112- 12:	Csa3G127130.1	Csa6G079220.1	0
112- 13:	Csa3G127750.1	Csa6G079750.1	0
112- 14:	Csa3G127790.1	Csa6G079760.1	4e-117
112- 15:	Csa3G128830.1	Csa6G079790.1	1e-79
112- 16:	Csa3G128870.1	Csa6G080360.1	1e-47
112- 17:	Csa3G128890.1	Csa6G080390.1	2e-57
## Alignment 113: score=702.0 e_value=4.6e-43 N=17 Chr3&Chr6 plus
113- 0:	Csa3G855410.1	Csa6G502080.1	2e-147
113- 1:	Csa3G855950.1	Csa6G502640.1	8e-108
113- 2:	Csa3G857070.1	Csa6G502690.1	3e-97
113- 3:	Csa3G859660.1	Csa6G502740.1	9e-178
113- 4:	Csa3G859680.1	Csa6G502820.1	3e-91
113- 5:	Csa3G859700.1	Csa6G502850.1	0
113- 6:	Csa3G859730.1	Csa6G503370.1	7e-90
113- 7:	Csa3G860250.1	Csa6G504440.1	2e-171
113- 8:	Csa3G860270.1	Csa6G504510.1	2e-41
113- 9:	Csa3G860320.1	Csa6G504520.1	3e-29
113- 10:	Csa3G865330.1	Csa6G504610.1	0
113- 11:	Csa3G865340.1	Csa6G504620.1	3e-41
113- 12:	Csa3G865400.1	Csa6G504650.1	2e-62
113- 13:	Csa3G872040.1	Csa6G505810.1	2e-37
113- 14:	Csa3G872130.1	Csa6G505890.1	7e-40
113- 15:	Csa3G872740.1	Csa6G506000.1	2e-93
113- 16:	Csa3G873810.1	Csa6G507180.1	9e-36
## Alignment 114: score=417.0 e_value=2e-19 N=10 Chr3&Chr6 plus
114- 0:	Csa3G777030.1	Csa6G425180.1	8e-128
114- 1:	Csa3G777680.1	Csa6G425740.1	2e-69
114- 2:	Csa3G778220.1	Csa6G425750.2	2e-76
114- 3:	Csa3G778330.1	Csa6G425770.1	1e-17
114- 4:	Csa3G778340.1	Csa6G425780.1	1e-15
114- 5:	Csa3G778990.1	Csa6G425850.1	1e-19
114- 6:	Csa3G782620.1	Csa6G426360.1	5e-171
114- 7:	Csa3G782630.1	Csa6G426370.1	4e-138
114- 8:	Csa3G782730.1	Csa6G426900.1	4e-109
114- 9:	Csa3G782780.1	Csa6G426930.1	0
## Alignment 115: score=402.0 e_value=1.2e-18 N=9 Chr3&Chr6 plus
115- 0:	Csa3G150120.1	Csa6G061240.1	0
115- 1:	Csa3G150200.1	Csa6G062290.1	2e-180
115- 2:	Csa3G150210.1	Csa6G062300.1	0
115- 3:	Csa3G150810.1	Csa6G062340.1	1e-139
115- 4:	Csa3G150820.1	Csa6G067350.1	4e-170
115- 5:	Csa3G150830.1	Csa6G067360.1	4e-60
115- 6:	Csa3G150850.1	Csa6G067380.1	0
115- 7:	Csa3G151430.1	Csa6G072980.1	0
115- 8:	Csa3G152050.2	Csa6G073490.1	3e-156
## Alignment 116: score=361.0 e_value=6e-16 N=9 Chr3&Chr6 plus
116- 0:	Csa3G738990.1	Csa6G140830.1	2e-88
116- 1:	Csa3G739050.1	Csa6G141350.1	5e-29
116- 2:	Csa3G739570.1	Csa6G141420.1	4e-137
116- 3:	Csa3G740120.1	Csa6G147510.1	7e-104
116- 4:	Csa3G740220.1	Csa6G147620.1	2e-38
116- 5:	Csa3G741330.1	Csa6G147660.1	7e-135
116- 6:	Csa3G743410.1	Csa6G148300.1	9e-45
116- 7:	Csa3G745020.1	Csa6G148350.1	0
116- 8:	Csa3G746550.1	Csa6G149430.1	0
## Alignment 117: score=267.0 e_value=3.1e-08 N=6 Chr3&Chr6 plus
117- 0:	Csa3G560210.1	Csa6G092010.1	1e-40
117- 1:	Csa3G563270.1	Csa6G092540.1	1e-59
117- 2:	Csa3G563290.1	Csa6G092550.1	1e-61
117- 3:	Csa3G564320.1	Csa6G093640.1	2e-68
117- 4:	Csa3G565330.1	Csa6G094710.1	1e-60
117- 5:	Csa3G567830.1	Csa6G094760.1	1e-45
## Alignment 118: score=253.0 e_value=4.9e-09 N=6 Chr3&Chr6 plus
118- 0:	Csa3G734090.1	Csa6G190250.1	4e-97
118- 1:	Csa3G734180.1	Csa6G190300.1	0
118- 2:	Csa3G734280.2	Csa6G190490.1	5e-40
118- 3:	Csa3G734290.1	Csa6G190990.1	0
118- 4:	Csa3G734340.1	Csa6G191540.1	0
118- 5:	Csa3G734930.1	Csa6G193620.1	2e-70
## Alignment 119: score=554.0 e_value=2.1e-27 N=12 Chr3&Chr6 minus
119- 0:	Csa3G159440.1	Csa6G319780.1	2e-72
119- 1:	Csa3G159460.1	Csa6G319760.1	2e-58
119- 2:	Csa3G164460.1	Csa6G319750.1	2e-22
119- 3:	Csa3G164500.1	Csa6G318710.1	7e-49
119- 4:	Csa3G164510.1	Csa6G318700.1	0
119- 5:	Csa3G164540.1	Csa6G318680.1	4e-08
119- 6:	Csa3G164580.1	Csa6G318160.1	8e-49
119- 7:	Csa3G165610.1	Csa6G312560.1	0
119- 8:	Csa3G165640.1	Csa6G312540.1	5e-47
119- 9:	Csa3G165690.1	Csa6G311520.1	1e-47
119- 10:	Csa3G166200.1	Csa6G310500.1	2e-31
119- 11:	Csa3G166230.1	Csa6G308410.1	0
## Alignment 120: score=544.0 e_value=2.5e-29 N=13 Chr3&Chr6 minus
120- 0:	Csa3G000140.1	Csa6G510230.1	0
120- 1:	Csa3G000160.1	Csa6G509690.1	0
120- 2:	Csa3G001720.1	Csa6G509590.1	1e-25
120- 3:	Csa3G002400.1	Csa6G509050.1	1e-133
120- 4:	Csa3G002420.1	Csa6G507520.1	2e-115
120- 5:	Csa3G002530.1	Csa6G507310.1	2e-58
120- 6:	Csa3G002570.1	Csa6G507290.1	0
120- 7:	Csa3G002590.1	Csa6G507240.1	5e-142
120- 8:	Csa3G002640.1	Csa6G507150.1	1e-156
120- 9:	Csa3G002700.1	Csa6G507070.1	1e-179
120- 10:	Csa3G002730.1	Csa6G507050.1	0
120- 11:	Csa3G002750.1	Csa6G506010.1	7e-134
120- 12:	Csa3G002760.1	Csa6G506000.1	2e-92
## Alignment 121: score=534.0 e_value=6.3e-31 N=13 Chr3&Chr6 minus
121- 0:	Csa3G889700.1	Csa6G499850.1	6e-06
121- 1:	Csa3G889760.1	Csa6G499840.1	0
121- 2:	Csa3G889880.1	Csa6G499720.1	6e-50
121- 3:	Csa3G889960.1	Csa6G499190.1	4e-28
121- 4:	Csa3G890070.1	Csa6G499100.1	0
121- 5:	Csa3G891630.1	Csa6G499050.1	2e-16
121- 6:	Csa3G892740.1	Csa6G497390.1	2e-135
121- 7:	Csa3G892750.1	Csa6G497340.1	0
121- 8:	Csa3G893290.1	Csa6G497330.1	3e-10
121- 9:	Csa3G893390.1	Csa6G497260.1	1e-82
121- 10:	Csa3G893400.1	Csa6G497240.1	9e-14
121- 11:	Csa3G893410.1	Csa6G497180.1	0
121- 12:	Csa3G895620.1	Csa6G497080.1	1e-138
## Alignment 122: score=517.0 e_value=2.7e-24 N=12 Chr3&Chr6 minus
122- 0:	Csa3G731810.1	Csa6G011600.1	0
122- 1:	Csa3G731880.1	Csa6G011040.1	0
122- 2:	Csa3G732410.1	Csa6G010020.1	6e-34
122- 3:	Csa3G732470.1	Csa6G010000.1	0
122- 4:	Csa3G732490.1	Csa6G009490.1	0
122- 5:	Csa3G732610.1	Csa6G009460.1	0
122- 6:	Csa3G733180.1	Csa6G009420.1	5e-70
122- 7:	Csa3G733260.1	Csa6G009380.1	3e-11
122- 8:	Csa3G733280.1	Csa6G008860.1	0
122- 9:	Csa3G733920.1	Csa6G008780.1	0
122- 10:	Csa3G733990.1	Csa6G008710.1	2e-14
122- 11:	Csa3G734110.1	Csa6G008640.1	0
## Alignment 123: score=314.0 e_value=2.2e-11 N=7 Chr3&Chr6 minus
123- 0:	Csa3G151490.1	Csa6G199810.1	7e-12
123- 1:	Csa3G152080.1	Csa6G198280.1	5e-43
123- 2:	Csa3G153180.1	Csa6G197230.1	0
123- 3:	Csa3G153720.1	Csa6G197210.1	6e-179
123- 4:	Csa3G153730.1	Csa6G194680.1	5e-14
123- 5:	Csa3G153750.1	Csa6G194670.1	3e-40
123- 6:	Csa3G154280.1	Csa6G194160.1	8e-57
## Alignment 124: score=290.0 e_value=8.1e-11 N=7 Chr3&Chr6 minus
124- 0:	Csa3G734950.1	Csa6G303760.1	1e-143
124- 1:	Csa3G735010.1	Csa6G302690.1	2e-26
124- 2:	Csa3G735030.1	Csa6G302190.1	0
124- 3:	Csa3G735550.1	Csa6G302120.1	5e-27
124- 4:	Csa3G736700.1	Csa6G301000.1	3e-161
124- 5:	Csa3G736760.1	Csa6G296960.1	2e-134
124- 6:	Csa3G736880.1	Csa6G290830.1	0
## Alignment 125: score=770.0 e_value=6.5e-53 N=19 Chr3&Chr7 plus
125- 0:	Csa3G659030.1	Csa7G419620.1	7e-10
125- 1:	Csa3G681140.1	Csa7G420770.1	0
125- 2:	Csa3G681150.1	Csa7G420780.1	6e-178
125- 3:	Csa3G686210.1	Csa7G420820.1	5e-53
125- 4:	Csa3G687730.1	Csa7G420870.1	0
125- 5:	Csa3G690810.1	Csa7G426580.1	2e-58
125- 6:	Csa3G690840.1	Csa7G427620.1	9e-159
125- 7:	Csa3G696860.1	Csa7G428170.1	0
125- 8:	Csa3G696890.1	Csa7G428190.1	1e-86
125- 9:	Csa3G697910.1	Csa7G428800.1	5e-10
125- 10:	Csa3G697940.1	Csa7G428820.2	9e-39
125- 11:	Csa3G698480.1	Csa7G428910.1	9e-24
125- 12:	Csa3G698520.1	Csa7G428920.1	7e-28
125- 13:	Csa3G698560.1	Csa7G428940.1	2e-135
125- 14:	Csa3G702640.1	Csa7G429520.1	5e-56
125- 15:	Csa3G710200.1	Csa7G430230.1	0
125- 16:	Csa3G710210.1	Csa7G430780.1	8e-39
125- 17:	Csa3G710730.1	Csa7G431400.1	1e-46
125- 18:	Csa3G716370.1	Csa7G432010.1	1e-72
## Alignment 126: score=624.0 e_value=8.9e-34 N=14 Chr3&Chr7 plus
126- 0:	Csa3G846050.1	Csa7G450580.1	1e-67
126- 1:	Csa3G848160.1	Csa7G450660.1	3e-13
126- 2:	Csa3G848250.1	Csa7G450800.1	4e-133
126- 3:	Csa3G848290.1	Csa7G451320.1	4e-102
126- 4:	Csa3G848300.1	Csa7G451340.1	0
126- 5:	Csa3G848830.1	Csa7G451390.1	0
126- 6:	Csa3G848860.1	Csa7G451400.1	3e-77
126- 7:	Csa3G849390.1	Csa7G451930.1	0
126- 8:	Csa3G849930.1	Csa7G451960.1	0
126- 9:	Csa3G849970.1	Csa7G452000.1	3e-130
126- 10:	Csa3G850500.1	Csa7G452010.2	0
126- 11:	Csa3G850530.1	Csa7G452040.1	5e-49
126- 12:	Csa3G850570.1	Csa7G452180.1	0
126- 13:	Csa3G850590.1	Csa7G452200.1	0
## Alignment 127: score=532.0 e_value=6.3e-27 N=12 Chr3&Chr7 plus
127- 0:	Csa3G199020.1	Csa7G071620.1	2e-35
127- 1:	Csa3G199040.1	Csa7G071630.1	6e-16
127- 2:	Csa3G199580.1	Csa7G071700.1	0
127- 3:	Csa3G199660.1	Csa7G072880.1	8e-89
127- 4:	Csa3G200180.1	Csa7G073410.1	4e-135
127- 5:	Csa3G200710.1	Csa7G073450.1	0
127- 6:	Csa3G202220.1	Csa7G073520.1	4e-78
127- 7:	Csa3G202720.1	Csa7G073530.1	0
127- 8:	Csa3G202730.1	Csa7G073560.1	5e-102
127- 9:	Csa3G205310.1	Csa7G073630.1	2e-139
127- 10:	Csa3G207390.1	Csa7G073700.1	8e-50
127- 11:	Csa3G207940.1	Csa7G073740.1	2e-43
## Alignment 128: score=283.0 e_value=2.5e-09 N=6 Chr3&Chr7 plus
128- 0:	Csa3G146480.1	Csa7G232570.1	2e-47
128- 1:	Csa3G146530.1	Csa7G234100.1	8e-60
128- 2:	Csa3G146540.1	Csa7G234110.1	2e-163
128- 3:	Csa3G146610.1	Csa7G234120.1	2e-61
128- 4:	Csa3G146660.1	Csa7G234140.1	3e-95
128- 5:	Csa3G146670.1	Csa7G234150.1	2e-38
## Alignment 129: score=270.0 e_value=5.3e-08 N=6 Chr3&Chr7 plus
129- 0:	Csa3G481220.1	Csa7G446740.1	0
129- 1:	Csa3G483760.1	Csa7G446830.2	5e-134
129- 2:	Csa3G483790.1	Csa7G446890.1	8e-61
129- 3:	Csa3G483820.1	Csa7G446980.1	0
129- 4:	Csa3G484830.1	Csa7G447000.1	8e-82
129- 5:	Csa3G485860.1	Csa7G447040.1	2e-48
## Alignment 130: score=251.0 e_value=1.9e-10 N=7 Chr3&Chr7 plus
130- 0:	Csa3G622430.1	Csa7G329380.1	0
130- 1:	Csa3G622450.1	Csa7G333400.1	6e-137
130- 2:	Csa3G624060.1	Csa7G336540.1	0
130- 3:	Csa3G627700.1	Csa7G339140.1	4e-22
130- 4:	Csa3G628230.1	Csa7G342770.1	1e-63
130- 5:	Csa3G632280.1	Csa7G352430.1	2e-12
130- 6:	Csa3G634350.1	Csa7G354530.1	2e-52
## Alignment 131: score=652.0 e_value=1.1e-31 N=14 Chr3&Chr7 minus
131- 0:	Csa3G644780.1	Csa7G448920.1	4e-08
131- 1:	Csa3G644790.1	Csa7G448890.1	6e-50
131- 2:	Csa3G645860.1	Csa7G448840.1	8e-10
131- 3:	Csa3G645940.1	Csa7G448810.1	2e-40
131- 4:	Csa3G645950.1	Csa7G448800.1	0
131- 5:	Csa3G646010.1	Csa7G448700.1	4e-11
131- 6:	Csa3G646510.1	Csa7G448680.1	2e-48
131- 7:	Csa3G646530.1	Csa7G448130.1	3e-94
131- 8:	Csa3G646560.1	Csa7G448110.1	1e-133
131- 9:	Csa3G646580.1	Csa7G448080.1	0
131- 10:	Csa3G646590.1	Csa7G448010.1	4e-18
131- 11:	Csa3G646610.1	Csa7G448000.1	0
131- 12:	Csa3G646640.1	Csa7G447990.1	0
131- 13:	Csa3G646670.1	Csa7G447970.1	6e-68
## Alignment 132: score=305.0 e_value=1.3e-12 N=7 Chr4&Chr4 plus
132- 0:	Csa4G082970.1	Csa4G625560.1	0
132- 1:	Csa4G083470.1	Csa4G626070.1	1e-180
132- 2:	Csa4G083480.1	Csa4G626080.1	2e-69
132- 3:	Csa4G083670.1	Csa4G627790.1	4e-08
132- 4:	Csa4G088720.1	Csa4G628330.1	6e-155
132- 5:	Csa4G088740.1	Csa4G628340.1	4e-37
132- 6:	Csa4G089270.1	Csa4G628910.1	1e-74
## Alignment 133: score=297.0 e_value=4.5e-12 N=7 Chr4&Chr4 minus
133- 0:	Csa4G000610.1	Csa4G644700.1	0
133- 1:	Csa4G000650.1	Csa4G643100.1	3e-22
133- 2:	Csa4G000670.1	Csa4G643090.1	0
133- 3:	Csa4G000890.1	Csa4G642470.1	3e-54
133- 4:	Csa4G000930.1	Csa4G642380.1	1e-36
133- 5:	Csa4G000980.1	Csa4G642360.1	8e-47
133- 6:	Csa4G001510.1	Csa4G642330.1	0
## Alignment 134: score=263.0 e_value=1e-09 N=6 Chr4&Chr4 minus
134- 0:	Csa4G056730.1	Csa4G618460.1	2e-27
134- 1:	Csa4G056770.1	Csa4G618450.1	0
134- 2:	Csa4G056800.1	Csa4G618430.1	6e-13
134- 3:	Csa4G061860.1	Csa4G618420.1	4e-78
134- 4:	Csa4G062910.1	Csa4G616770.1	2e-62
134- 5:	Csa4G062920.1	Csa4G615750.1	0
## Alignment 135: score=484.0 e_value=7.4e-26 N=12 Chr4&Chr5 plus
135- 0:	Csa4G292470.1	Csa5G175970.1	1e-70
135- 1:	Csa4G293030.1	Csa5G176010.1	2e-133
135- 2:	Csa4G293190.1	Csa5G177660.1	3e-126
135- 3:	Csa4G293210.1	Csa5G177670.1	7e-52
135- 4:	Csa4G293250.1	Csa5G178700.1	1e-83
135- 5:	Csa4G293290.1	Csa5G179770.1	8e-32
135- 6:	Csa4G293330.1	Csa5G180920.1	4e-35
135- 7:	Csa4G293840.1	Csa5G181430.1	7e-144
135- 8:	Csa4G295460.1	Csa5G182030.1	1e-48
135- 9:	Csa4G296100.1	Csa5G182120.1	1e-167
135- 10:	Csa4G296170.1	Csa5G182660.1	6e-11
135- 11:	Csa4G296280.1	Csa5G184310.1	0
## Alignment 136: score=438.0 e_value=3.1e-20 N=10 Chr4&Chr5 plus
136- 0:	Csa4G293220.1	Csa5G505190.1	1e-56
136- 1:	Csa4G293270.1	Csa5G505210.1	3e-26
136- 2:	Csa4G293290.1	Csa5G505220.1	5e-33
136- 3:	Csa4G293840.1	Csa5G505820.1	2e-136
136- 4:	Csa4G294380.1	Csa5G512870.1	1e-89
136- 5:	Csa4G295440.1	Csa5G514500.1	0
136- 6:	Csa4G295510.1	Csa5G517090.1	8e-09
136- 7:	Csa4G296030.2	Csa5G517100.1	0
136- 8:	Csa4G296090.1	Csa5G517150.1	3e-163
136- 9:	Csa4G296100.1	Csa5G517210.1	2e-148
## Alignment 137: score=273.0 e_value=5.3e-13 N=7 Chr4&Chr5 plus
137- 0:	Csa4G297530.1	Csa5G187330.1	2e-140
137- 1:	Csa4G303110.1	Csa5G188900.1	1e-15
137- 2:	Csa4G303180.1	Csa5G190520.1	7e-128
137- 3:	Csa4G303700.1	Csa5G190530.1	3e-67
137- 4:	Csa4G307350.1	Csa5G198220.1	8e-24
137- 5:	Csa4G308500.1	Csa5G198240.1	1e-91
137- 6:	Csa4G308560.1	Csa5G201320.1	4e-59
## Alignment 138: score=263.0 e_value=1.8e-08 N=6 Chr4&Chr5 plus
138- 0:	Csa4G372620.1	Csa5G381800.1	0
138- 1:	Csa4G374120.1	Csa5G381820.1	2e-44
138- 2:	Csa4G377160.1	Csa5G383350.1	0
138- 3:	Csa4G377180.1	Csa5G387430.1	0
138- 4:	Csa4G378780.1	Csa5G396000.1	3e-35
138- 5:	Csa4G379280.1	Csa5G402540.1	0
## Alignment 139: score=259.0 e_value=0 N=6 Chr4&Chr5 plus
139- 0:	Csa4G023020.1	Csa5G167110.1	2e-31
139- 1:	Csa4G023040.1	Csa5G167130.1	2e-33
139- 2:	Csa4G025200.1	Csa5G168780.1	6e-141
139- 3:	Csa4G025200.4	Csa5G168780.2	1e-103
139- 4:	Csa4G025720.1	Csa5G168830.1	5e-22
139- 5:	Csa4G025740.1	Csa5G168970.1	4e-70
## Alignment 140: score=514.0 e_value=2.3e-28 N=12 Chr4&Chr5 minus
140- 0:	Csa4G047930.1	Csa5G152850.1	0
140- 1:	Csa4G049090.1	Csa5G152800.1	2e-91
140- 2:	Csa4G049110.1	Csa5G152250.1	2e-27
140- 3:	Csa4G050170.1	Csa5G152170.1	0
140- 4:	Csa4G051360.1	Csa5G151530.1	2e-94
140- 5:	Csa4G051380.1	Csa5G151510.1	2e-14
140- 6:	Csa4G051440.1	Csa5G150970.1	0
140- 7:	Csa4G051450.1	Csa5G150470.1	6e-28
140- 8:	Csa4G051500.1	Csa5G150420.1	3e-23
140- 9:	Csa4G051530.1	Csa5G150400.1	0
140- 10:	Csa4G051550.1	Csa5G150390.1	0
140- 11:	Csa4G052730.1	Csa5G148780.1	5e-94
## Alignment 141: score=314.0 e_value=2.2e-14 N=8 Chr4&Chr5 minus
141- 0:	Csa4G047900.1	Csa5G146910.1	5e-175
141- 1:	Csa4G047970.1	Csa5G146310.1	4e-61
141- 2:	Csa4G047990.1	Csa5G141100.1	1e-165
141- 3:	Csa4G049110.1	Csa5G140450.1	2e-21
141- 4:	Csa4G050120.1	Csa5G139930.1	5e-37
141- 5:	Csa4G050180.1	Csa5G139900.1	6e-21
141- 6:	Csa4G050190.1	Csa5G139870.1	0
141- 7:	Csa4G051360.1	Csa5G139630.1	3e-41
## Alignment 142: score=521.0 e_value=3.5e-29 N=13 Chr4&Chr6 plus
142- 0:	Csa4G303120.1	Csa6G008860.1	0
142- 1:	Csa4G304230.1	Csa6G009380.1	2e-10
142- 2:	Csa4G307380.1	Csa6G009430.1	9e-37
142- 3:	Csa4G308480.1	Csa6G009490.1	0
142- 4:	Csa4G308490.1	Csa6G010000.1	0
142- 5:	Csa4G308560.1	Csa6G011570.1	2e-60
142- 6:	Csa4G308580.1	Csa6G011590.1	2e-104
142- 7:	Csa4G310710.1	Csa6G011700.1	5e-110
142- 8:	Csa4G312880.1	Csa6G012800.1	3e-79
142- 9:	Csa4G314390.1	Csa6G012810.1	7e-42
142- 10:	Csa4G325530.1	Csa6G013870.1	6e-160
142- 11:	Csa4G329560.1	Csa6G013900.1	7e-25
142- 12:	Csa4G331070.1	Csa6G014480.1	1e-52
## Alignment 143: score=440.0 e_value=6.8e-20 N=10 Chr4&Chr6 plus
143- 0:	Csa4G642360.1	Csa6G494960.1	3e-44
143- 1:	Csa4G642430.1	Csa6G495020.1	2e-64
143- 2:	Csa4G642510.1	Csa6G495110.1	1e-67
143- 3:	Csa4G642520.1	Csa6G495680.1	0
143- 4:	Csa4G644640.1	Csa6G495820.1	1e-84
143- 5:	Csa4G644650.1	Csa6G495840.1	3e-107
143- 6:	Csa4G644670.1	Csa6G495860.1	2e-16
143- 7:	Csa4G644740.1	Csa6G496390.1	2e-174
143- 8:	Csa4G645320.1	Csa6G496960.1	2e-27
143- 9:	Csa4G645820.1	Csa6G496990.1	5e-75
## Alignment 144: score=411.0 e_value=1e-19 N=9 Chr4&Chr6 plus
144- 0:	Csa4G639850.2	Csa6G490900.1	4e-67
144- 1:	Csa4G639860.1	Csa6G490910.1	4e-139
144- 2:	Csa4G641520.1	Csa6G491080.1	3e-74
144- 3:	Csa4G641600.1	Csa6G491600.1	2e-154
144- 4:	Csa4G641660.1	Csa6G491640.1	2e-30
144- 5:	Csa4G641690.1	Csa6G491690.1	3e-85
144- 6:	Csa4G641700.1	Csa6G491700.1	5e-109
144- 7:	Csa4G641740.1	Csa6G492220.1	3e-81
144- 8:	Csa4G641760.1	Csa6G492230.1	2e-165
## Alignment 145: score=334.0 e_value=5.2e-11 N=7 Chr4&Chr6 plus
145- 0:	Csa4G293220.1	Csa6G302160.1	1e-19
145- 1:	Csa4G293250.1	Csa6G302190.1	6e-140
145- 2:	Csa4G293260.1	Csa6G302690.1	3e-31
145- 3:	Csa4G293330.1	Csa6G303740.1	3e-33
145- 4:	Csa4G293850.1	Csa6G303760.1	3e-155
145- 5:	Csa4G293870.1	Csa6G303770.1	1e-69
145- 6:	Csa4G294400.1	Csa6G303790.1	1e-28
## Alignment 146: score=255.0 e_value=8.9e-10 N=6 Chr4&Chr6 plus
146- 0:	Csa4G025170.1	Csa6G499790.1	5e-104
146- 1:	Csa4G026270.1	Csa6G499850.1	4e-153
146- 2:	Csa4G026810.1	Csa6G499860.1	3e-08
146- 3:	Csa4G028470.1	Csa6G500540.1	0
146- 4:	Csa4G030990.1	Csa6G500590.1	2e-34
146- 5:	Csa4G031000.1	Csa6G500600.1	0
## Alignment 147: score=437.0 e_value=2.3e-18 N=10 Chr4&Chr6 minus
147- 0:	Csa4G043880.1	Csa6G505240.1	1e-40
147- 1:	Csa4G043900.1	Csa6G504720.1	4e-11
147- 2:	Csa4G043960.1	Csa6G504650.1	5e-66
147- 3:	Csa4G044980.1	Csa6G504610.1	5e-89
147- 4:	Csa4G045010.1	Csa6G504560.1	1e-179
147- 5:	Csa4G045060.1	Csa6G504520.1	2e-28
147- 6:	Csa4G046070.1	Csa6G504440.1	2e-161
147- 7:	Csa4G046610.1	Csa6G503870.1	4e-80
147- 8:	Csa4G046740.1	Csa6G502740.1	0
147- 9:	Csa4G047340.1	Csa6G502660.1	0
## Alignment 148: score=308.0 e_value=1.2e-10 N=7 Chr4&Chr6 minus
148- 0:	Csa4G630010.1	Csa6G518040.1	2e-32
148- 1:	Csa4G631590.1	Csa6G517960.1	3e-45
148- 2:	Csa4G637130.1	Csa6G517410.1	9e-47
148- 3:	Csa4G637700.1	Csa6G517350.1	8e-94
148- 4:	Csa4G637750.1	Csa6G517320.1	1e-61
148- 5:	Csa4G637820.1	Csa6G517230.1	2e-121
148- 6:	Csa4G638320.1	Csa6G517220.1	9e-123
## Alignment 149: score=272.0 e_value=1e-08 N=6 Chr4&Chr6 minus
149- 0:	Csa4G295450.1	Csa6G191540.1	0
149- 1:	Csa4G295480.1	Csa6G190990.1	0
149- 2:	Csa4G295490.1	Csa6G190490.1	6e-43
149- 3:	Csa4G296090.1	Csa6G190370.1	0
149- 4:	Csa4G296100.1	Csa6G190340.1	3e-171
149- 5:	Csa4G296150.1	Csa6G190270.1	0
## Alignment 150: score=262.0 e_value=1.7e-10 N=7 Chr4&Chr6 minus
150- 0:	Csa4G000020.1	Csa6G497020.1	1e-17
150- 1:	Csa4G000620.1	Csa6G495850.1	3e-12
150- 2:	Csa4G000700.1	Csa6G495710.1	7e-79
150- 3:	Csa4G000720.1	Csa6G495640.1	4e-104
150- 4:	Csa4G000910.1	Csa6G495070.1	0
150- 5:	Csa4G000980.1	Csa6G494960.1	2e-43
150- 6:	Csa4G001520.1	Csa6G493840.1	2e-23
## Alignment 151: score=596.0 e_value=3.8e-35 N=14 Chr4&Chr7 plus
151- 0:	Csa4G001590.1	Csa7G395260.1	0
151- 1:	Csa4G001640.1	Csa7G396340.1	2e-41
151- 2:	Csa4G001710.1	Csa7G396440.1	0
151- 3:	Csa4G001850.1	Csa7G398090.1	3e-15
151- 4:	Csa4G001940.1	Csa7G405310.1	0
151- 5:	Csa4G002530.1	Csa7G405940.1	0
151- 6:	Csa4G002550.1	Csa7G405950.1	9e-38
151- 7:	Csa4G002570.1	Csa7G407000.1	3e-24
151- 8:	Csa4G002580.1	Csa7G407500.1	6e-17
151- 9:	Csa4G003100.1	Csa7G407590.1	0
151- 10:	Csa4G003600.1	Csa7G407600.1	0
151- 11:	Csa4G003610.1	Csa7G407630.1	9e-139
151- 12:	Csa4G003660.1	Csa7G407660.1	2e-29
151- 13:	Csa4G003670.1	Csa7G407670.1	2e-39
## Alignment 152: score=371.0 e_value=6.4e-16 N=8 Chr4&Chr7 plus
152- 0:	Csa4G652090.1	Csa7G431440.1	1e-38
152- 1:	Csa4G652110.1	Csa7G432050.1	2e-16
152- 2:	Csa4G652120.1	Csa7G432060.1	1e-61
152- 3:	Csa4G652130.1	Csa7G432070.1	6e-83
152- 4:	Csa4G652640.1	Csa7G432080.1	3e-60
152- 5:	Csa4G652670.1	Csa7G432090.1	2e-158
152- 6:	Csa4G652680.1	Csa7G432100.1	9e-31
152- 7:	Csa4G652810.1	Csa7G432210.1	2e-16
## Alignment 153: score=357.0 e_value=3.4e-13 N=8 Chr4&Chr7 plus
153- 0:	Csa4G000580.1	Csa7G070770.1	0
153- 1:	Csa4G000650.1	Csa7G070820.1	9e-11
153- 2:	Csa4G000680.1	Csa7G070830.1	8e-10
153- 3:	Csa4G000710.1	Csa7G071360.1	2e-166
153- 4:	Csa4G000880.1	Csa7G071400.1	0
153- 5:	Csa4G000890.1	Csa7G071410.1	8e-62
153- 6:	Csa4G000930.1	Csa7G071460.1	2e-36
153- 7:	Csa4G001520.1	Csa7G071570.1	2e-15
## Alignment 154: score=305.0 e_value=4.6e-13 N=8 Chr4&Chr7 plus
154- 0:	Csa4G653410.1	Csa7G018770.1	0
154- 1:	Csa4G658480.1	Csa7G023940.1	7e-23
154- 2:	Csa4G658610.1	Csa7G024110.1	1e-13
154- 3:	Csa4G663670.1	Csa7G024140.1	2e-94
154- 4:	Csa4G664240.1	Csa7G024160.1	0
154- 5:	Csa4G664290.1	Csa7G025200.1	0
154- 6:	Csa4G664420.1	Csa7G027790.1	0
154- 7:	Csa4G665110.1	Csa7G029430.1	1e-20
## Alignment 155: score=522.0 e_value=4.9e-30 N=13 Chr4&Chr7 minus
155- 0:	Csa4G639070.1	Csa7G073780.1	2e-38
155- 1:	Csa4G639800.1	Csa7G073680.1	0
155- 2:	Csa4G639810.1	Csa7G073620.1	2e-07
155- 3:	Csa4G641530.1	Csa7G073410.1	3e-101
155- 4:	Csa4G641600.1	Csa7G073400.1	0
155- 5:	Csa4G641660.1	Csa7G072880.1	2e-68
155- 6:	Csa4G641680.1	Csa7G071670.1	2e-79
155- 7:	Csa4G642270.1	Csa7G071600.1	4e-81
155- 8:	Csa4G642380.1	Csa7G071460.1	2e-36
155- 9:	Csa4G642420.1	Csa7G071450.1	3e-160
155- 10:	Csa4G642460.1	Csa7G071440.1	2e-62
155- 11:	Csa4G642470.1	Csa7G071410.1	1e-52
155- 12:	Csa4G643070.1	Csa7G071340.1	7e-100
## Alignment 156: score=421.0 e_value=6.5e-17 N=9 Chr4&Chr7 minus
156- 0:	Csa4G004840.1	Csa7G433230.1	5e-58
156- 1:	Csa4G004870.1	Csa7G433180.1	2e-12
156- 2:	Csa4G004920.1	Csa7G432620.1	4e-63
156- 3:	Csa4G004970.1	Csa7G432600.1	0
156- 4:	Csa4G004980.1	Csa7G432590.1	3e-12
156- 5:	Csa4G004990.2	Csa7G432580.1	6e-34
156- 6:	Csa4G005010.1	Csa7G432570.1	2e-29
156- 7:	Csa4G005520.1	Csa7G432540.1	1e-53
156- 8:	Csa4G005540.1	Csa7G432460.1	9e-96
## Alignment 157: score=367.0 e_value=3.4e-17 N=9 Chr4&Chr7 minus
157- 0:	Csa4G645880.1	Csa7G452010.2	3e-159
157- 1:	Csa4G646080.1	Csa7G451320.1	7e-59
157- 2:	Csa4G646140.1	Csa7G450770.1	0
157- 3:	Csa4G646180.1	Csa7G450750.1	2e-86
157- 4:	Csa4G646210.1	Csa7G450720.1	9e-29
157- 5:	Csa4G646360.1	Csa7G450630.1	5e-173
157- 6:	Csa4G646410.1	Csa7G450580.1	5e-66
157- 7:	Csa4G648560.1	Csa7G449430.1	9e-137
157- 8:	Csa4G648590.1	Csa7G448890.1	1e-44
## Alignment 158: score=534.0 e_value=5.1e-26 N=12 Chr5&Chr5 plus
158- 0:	Csa5G604320.1	Csa5G635410.1	0
158- 1:	Csa5G604920.1	Csa5G635430.1	3e-77
158- 2:	Csa5G604930.1	Csa5G635450.1	3e-80
158- 3:	Csa5G604940.1	Csa5G635950.1	3e-31
158- 4:	Csa5G605070.1	Csa5G636480.1	3e-24
158- 5:	Csa5G605080.1	Csa5G636510.1	4e-58
158- 6:	Csa5G605140.1	Csa5G636550.1	3e-29
158- 7:	Csa5G605210.1	Csa5G636570.1	8e-27
158- 8:	Csa5G605760.1	Csa5G636630.1	3e-135
158- 9:	Csa5G606300.1	Csa5G636650.1	4e-56
158- 10:	Csa5G606370.1	Csa5G637680.1	0
158- 11:	Csa5G606470.1	Csa5G637800.1	2e-148
## Alignment 159: score=386.0 e_value=1.3e-17 N=9 Chr5&Chr5 plus
159- 0:	Csa5G177090.1	Csa5G503610.1	0
159- 1:	Csa5G178720.1	Csa5G505200.1	5e-69
159- 2:	Csa5G179770.1	Csa5G505220.1	4e-41
159- 3:	Csa5G180850.1	Csa5G505240.1	2e-102
159- 4:	Csa5G180860.1	Csa5G505800.1	3e-110
159- 5:	Csa5G181430.1	Csa5G505820.1	9e-142
159- 6:	Csa5G181440.1	Csa5G512850.1	1e-128
159- 7:	Csa5G181450.1	Csa5G512860.1	0
159- 8:	Csa5G182030.1	Csa5G515000.1	5e-57
## Alignment 160: score=331.0 e_value=6.6e-13 N=7 Chr5&Chr5 plus
160- 0:	Csa5G577370.1	Csa5G608210.1	2e-67
160- 1:	Csa5G577380.1	Csa5G608220.1	1e-73
160- 2:	Csa5G577390.1	Csa5G608230.1	3e-11
160- 3:	Csa5G577410.1	Csa5G608250.1	0
160- 4:	Csa5G577430.1	Csa5G608280.2	3e-140
160- 5:	Csa5G577450.1	Csa5G608320.1	7e-29
160- 6:	Csa5G579060.1	Csa5G608450.1	3e-127
## Alignment 161: score=504.0 e_value=2.4e-27 N=11 Chr5&Chr5 minus
161- 0:	Csa5G571460.1	Csa5G611700.1	5e-151
161- 1:	Csa5G571500.1	Csa5G611680.1	2e-72
161- 2:	Csa5G576620.1	Csa5G611600.1	0
161- 3:	Csa5G576650.4	Csa5G611040.2	0
161- 4:	Csa5G576650.2	Csa5G611040.1	0
161- 5:	Csa5G576720.1	Csa5G610490.1	4e-30
161- 6:	Csa5G576760.1	Csa5G610420.1	0
161- 7:	Csa5G576780.1	Csa5G610400.1	3e-88
161- 8:	Csa5G576790.1	Csa5G610390.1	6e-160
161- 9:	Csa5G577340.1	Csa5G610320.1	0
161- 10:	Csa5G577350.1	Csa5G609820.1	2e-66
## Alignment 162: score=556.0 e_value=3.2e-32 N=13 Chr5&Chr6 plus
162- 0:	Csa5G182730.1	Csa6G008680.1	0
162- 1:	Csa5G182750.1	Csa6G008690.1	8e-62
162- 2:	Csa5G184300.1	Csa6G008730.1	0
162- 3:	Csa5G184820.1	Csa6G008820.1	0
162- 4:	Csa5G189920.1	Csa6G009380.1	3e-26
162- 5:	Csa5G190520.3	Csa6G009390.1	1e-75
162- 6:	Csa5G190530.1	Csa6G009400.1	8e-81
162- 7:	Csa5G198150.1	Csa6G009470.1	0
162- 8:	Csa5G198170.1	Csa6G009480.1	7e-124
162- 9:	Csa5G201310.1	Csa6G011040.1	0
162- 10:	Csa5G201320.1	Csa6G011570.1	2e-70
162- 11:	Csa5G202350.1	Csa6G011620.1	9e-75
162- 12:	Csa5G203390.1	Csa6G011650.1	0
## Alignment 163: score=348.0 e_value=4.7e-18 N=9 Chr5&Chr6 plus
163- 0:	Csa5G175870.1	Csa6G290790.1	9e-76
163- 1:	Csa5G175970.1	Csa6G296960.1	6e-78
163- 2:	Csa5G176030.1	Csa6G301000.1	3e-165
163- 3:	Csa5G177140.1	Csa6G302130.1	0
163- 4:	Csa5G177700.1	Csa6G302180.1	0
163- 5:	Csa5G178700.1	Csa6G302190.1	9e-126
163- 6:	Csa5G180920.1	Csa6G303740.1	2e-35
163- 7:	Csa5G181420.1	Csa6G303750.1	1e-83
163- 8:	Csa5G182090.1	Csa6G303760.1	2e-143
## Alignment 164: score=259.0 e_value=2e-08 N=6 Chr5&Chr6 plus
164- 0:	Csa5G604020.1	Csa6G401550.1	0
164- 1:	Csa5G604030.1	Csa6G402550.1	7e-10
164- 2:	Csa5G604110.1	Csa6G403600.1	1e-161
164- 3:	Csa5G604280.1	Csa6G404120.1	0
164- 4:	Csa5G604340.1	Csa6G404140.1	0
164- 5:	Csa5G604940.1	Csa6G404200.1	1e-35
## Alignment 165: score=377.0 e_value=3.2e-20 N=9 Chr5&Chr6 minus
165- 0:	Csa5G151610.1	Csa6G006830.1	6e-83
165- 1:	Csa5G152140.1	Csa6G006820.1	3e-44
165- 2:	Csa5G152240.1	Csa6G006790.1	2e-23
165- 3:	Csa5G152250.1	Csa6G006790.3	2e-12
165- 4:	Csa5G152810.1	Csa6G006730.1	0
165- 5:	Csa5G153010.1	Csa6G004550.1	0
165- 6:	Csa5G153030.1	Csa6G004530.1	0
165- 7:	Csa5G153690.1	Csa6G003410.1	7e-89
165- 8:	Csa5G154780.1	Csa6G003390.1	2e-177
## Alignment 166: score=278.0 e_value=1.7e-11 N=7 Chr5&Chr6 minus
166- 0:	Csa5G198160.1	Csa6G188070.1	3e-170
166- 1:	Csa5G198240.1	Csa6G187960.1	5e-93
166- 2:	Csa5G202380.1	Csa6G185300.1	2e-104
166- 3:	Csa5G207940.1	Csa6G185260.1	2e-85
166- 4:	Csa5G211530.1	Csa6G182110.1	0
166- 5:	Csa5G211540.1	Csa6G181610.1	2e-70
166- 6:	Csa5G215140.1	Csa6G181550.1	7e-60
## Alignment 167: score=268.0 e_value=3.9e-08 N=6 Chr5&Chr6 minus
167- 0:	Csa5G622660.1	Csa6G406020.1	0
167- 1:	Csa5G622780.1	Csa6G405950.1	0
167- 2:	Csa5G622830.1	Csa6G405920.1	8e-86
[truncated: 105 more rows]
