# Supplementary material for: Comprehensive Analysis of Cucumber Gibberellin Oxidase Family Genes and Functional Characterization of CsGA20ox1 in Root Development in Arabidopsis
Source: Int J Mol Sci. 2018 Oct 12;19(10):3135. doi: 10.3390/ijms19103135 (PMC6213227; doi:10.3390/ijms19103135)
Supplement: Supplementary file 1 [file ijms-19-03135-s001.zip › Table S2.xls]

## Sheet: BPC-GRAS
Table S2 Potential binding sites of BBR/BPC and GRAS transcription factors and conserved motifs in promoters of CsGAoxs. Green, yellow and pink box represents Motif1, Motif2 and Motif3, respectively, which are consistent with Figure 3.
Transcription factor	CsGAox gene	Start	End	Strand	p value	Sequence	Family	Motif 1	Motif 2	Motif 3
Csa2G365700.1	Csa1G033040.1	155	175	+	3.82e-06	ctgtgtctgtttctttctttt	BBR-BPC
Csa5G569350.1	Csa1G033040.1	1105	1124	+	1.37e-06	aagaaaaaaagaaaagggaa	GRAS
Csa5G569350.1	Csa1G033040.1	150	169	-	8.45e-06	AAGAAACAGACACAGCAAAA	GRAS
Csa5G569350.1	Csa1G033040.1	160	179	-	9.37e-06	CAGTAAAAGAAAGAAACAGA	GRAS
Csa5G569350.1	Csa1G033040.1	494	513	-	2.61e-06	AAGAAAAAGACAAATCTAGA	GRAS
Csa2G365700.1	Csa1G033050.1	704	724	-	5.68e-06	TTTGTTTTCTCTCTCTTTTTA	BBR-BPC
Csa5G569350.1	Csa1G033050.1	706	725	+	7.44e-06	aaaagagagagaaaacaaac	GRAS
Csa2G365700.1	Csa1G064730.1	662	682	+	2.52e-08	taccttttctttctctctctc	BBR-BPC
Csa2G365700.1	Csa1G064730.1	664	684	+	3.56e-09	ccttttctttctctctctctc	BBR-BPC
Csa2G365700.1	Csa1G064730.1	666	686	+	9.97e-09	ttttctttctctctctctcac	BBR-BPC
Csa2G365700.1	Csa1G064730.1	668	688	+	1.06e-08	ttctttctctctctctcacaa	BBR-BPC
Csa2G365700.1	Csa1G064730.1	670	690	+	2.38e-07	ctttctctctctctcacaatt	BBR-BPC
Csa2G365700.1	Csa1G064730.1	672	692	+	6.28e-06	ttctctctctctcacaatttt	BBR-BPC
Csa5G569350.1	Csa1G064730.1	1214	1233	+	4.34e-07	gagaagaagaaaaaggaggg	GRAS
Csa5G569350.1	Csa1G064730.1	1312	1331	+	1.98e-06	aagaaaaagaaaaaacaaga	GRAS
Csa5G569350.1	Csa1G064730.1	661	680	-	4.45e-06	GAGAGAGAAAGAAAAGGTAG	GRAS
Csa5G569350.1	Csa1G064730.1	663	682	-	9.7e-06	GAGAGAGAGAAAGAAAAGGT	GRAS
Csa5G569350.1	Csa1G064730.1	665	684	-	5.11e-08	GAGAGAGAGAGAAAGAAAAG	GRAS
Csa5G569350.1	Csa1G064730.1	667	686	-	6.77e-06	GTGAGAGAGAGAGAAAGAAA	GRAS
Csa2G365700.1	Csa1G439830.1	475	495	-	8.74e-06	CTTTTTCTTTTTCTTTTTCTT	BBR-BPC
Csa2G365700.1	Csa1G439830.1	806	826	+	3.6e-06	atttttctttttctttctttc	BBR-BPC
Csa2G365700.1	Csa1G439830.1	810	830	+	2.4e-06	ttctttttctttctttcccaa	BBR-BPC
Csa5G569350.1	Csa1G439830.1	475	494	+	3.29e-06	aagaaaaagaaaaagaaaaa	GRAS
Csa5G569350.1	Csa1G439830.1	481	500	+	4.23e-06	aagaaaaagaaaaagaagaa	GRAS
Csa5G569350.1	Csa1G439830.1	651	670	-	9.16e-06	GAAAAGAAAAGAAAAGAAGT	GRAS
Csa5G569350.1	Csa1G439830.1	656	675	-	7.1e-06	GAAAAGAAAAGAAAAGAAAA	GRAS
Csa5G569350.1	Csa1G439830.1	661	680	-	7.1e-06	GAAAAGAAAAGAAAAGAAAA	GRAS
Csa5G569350.1	Csa1G439830.1	666	685	-	7.1e-06	GAAAAGAAAAGAAAAGAAAA	GRAS
Csa5G569350.1	Csa1G439830.1	671	690	-	7.1e-06	GAAAAGAAAAGAAAAGAAAA	GRAS
Csa5G569350.1	Csa1G439830.1	681	700	-	9.92e-06	GGGTAAAAAAGAAAAGAAAA	GRAS
Csa5G569350.1	Csa1G439830.1	809	828	-	2.68e-06	GGGAAAGAAAGAAAAAGAAA	GRAS
Csa5G569350.1	Csa2G379300.1	1363	1382	-	2.15e-06	AAGAAAGGGACAAAACATGT	GRAS
Csa5G569350.1	Csa2G379300.1	760	779	-	5.67e-06	AAAGAAAAGACAAGAGGAGT	GRAS
Csa2G365700.1	Csa3G179110.1	782	802	+	8.47e-06	cctctttgccctctctctctt	BBR-BPC
Csa2G365700.1	Csa3G179110.1	784	804	+	3.37e-06	tctttgccctctctctcttcc	BBR-BPC
Csa2G365700.1	Csa4G075200.1	1175	1195	+	1.54e-06	aaaaaccactctctctctctc	BBR-BPC
Csa2G365700.1	Csa4G075200.1	1177	1197	+	1.16e-08	aaaccactctctctctctctc	BBR-BPC
Csa2G365700.1	Csa4G075200.1	1179	1199	+	2.47e-11	accactctctctctctctctc	BBR-BPC
Csa2G365700.1	Csa4G075200.1	1181	1201	+	1.88e-13	cactctctctctctctctctc	BBR-BPC
Csa2G365700.1	Csa4G075200.1	1183	1203	+	4.14e-14	ctctctctctctctctctctc	BBR-BPC
Csa2G365700.1	Csa4G075200.1	1185	1205	+	4.14e-14	ctctctctctctctctctctc	BBR-BPC
Csa2G365700.1	Csa4G075200.1	1187	1207	+	1.47e-13	ctctctctctctctctctcta	BBR-BPC
Csa2G365700.1	Csa4G075200.1	1189	1209	+	2.89e-12	ctctctctctctctctctatc	BBR-BPC
Csa2G365700.1	Csa4G075200.1	1191	1211	+	1.26e-12	ctctctctctctctctatctc	BBR-BPC
Csa2G365700.1	Csa4G075200.1	1193	1213	+	1.49e-12	ctctctctctctctatctctc	BBR-BPC
Csa2G365700.1	Csa4G075200.1	1195	1215	+	1.27e-09	ctctctctctctatctctcca	BBR-BPC
Csa2G365700.1	Csa4G075200.1	1197	1217	+	2.37e-07	ctctctctctatctctccaaa	BBR-BPC
Csa2G365700.1	Csa4G075200.1	1199	1219	+	4.85e-06	ctctctctatctctccaaaac	BBR-BPC
Csa2G365700.1	Csa4G075200.1	1231	1251	+	7.33e-06	attcacccctatctctctctc	BBR-BPC
Csa2G365700.1	Csa4G075200.1	1233	1253	+	2.73e-06	tcacccctatctctctctccc	BBR-BPC
Csa2G365700.1	Csa4G075200.1	1235	1255	+	2.11e-07	acccctatctctctctccctc	BBR-BPC
Csa2G365700.1	Csa4G075200.1	1237	1257	+	1.27e-10	ccctatctctctctccctctc	BBR-BPC
Csa2G365700.1	Csa4G075200.1	1239	1259	+	2.5e-09	ctatctctctctccctctccc	BBR-BPC
Csa2G365700.1	Csa4G075200.1	1241	1261	+	1.26e-08	atctctctctccctctccctc	BBR-BPC
Csa2G365700.1	Csa4G075200.1	1243	1263	+	2.26e-08	ctctctctccctctccctcct	BBR-BPC
Csa2G365700.1	Csa4G075200.1	1245	1265	+	6.2e-08	ctctctccctctccctccttt	BBR-BPC
Csa2G365700.1	Csa4G075200.1	1247	1267	+	4.92e-06	ctctccctctccctccttttc	BBR-BPC
Csa2G365700.1	Csa4G075200.1	1249	1269	+	6.7e-07	ctccctctccctccttttctc	BBR-BPC
Csa2G365700.1	Csa4G075200.1	1253	1273	+	3.91e-06	ctctccctccttttctctctt	BBR-BPC
Csa2G365700.1	Csa4G075200.1	1255	1275	+	2.1e-06	ctccctccttttctctcttat	BBR-BPC
Csa2G365700.1	Csa4G075200.1	1281	1301	+	1.67e-06	ccctcattctctccttccttc	BBR-BPC
Csa2G365700.1	Csa4G075200.1	1387	1407	+	4.46e-06	atctctcacactctctttttc	BBR-BPC
Csa2G365700.1	Csa4G075200.1	1389	1409	+	4.62e-07	ctctcacactctctttttctt	BBR-BPC
Csa2G365700.1	Csa4G075200.1	1393	1413	+	5.62e-06	cacactctctttttcttcctc	BBR-BPC
Csa2G365700.1	Csa4G075200.1	1395	1415	+	1.08e-06	cactctctttttcttcctctg	BBR-BPC
Csa2G365700.1	Csa4G075200.1	1399	1419	+	3.91e-06	ctctttttcttcctctgtttc	BBR-BPC
Csa2G365700.1	Csa4G075200.1	330	350	+	3.32e-06	taatcactctctatttctctt	BBR-BPC
Csa2G365700.1	Csa4G075200.1	332	352	+	3.82e-06	atcactctctatttctctttc	BBR-BPC
Csa2G365700.1	Csa4G075200.1	334	354	+	2.82e-07	cactctctatttctctttctt	BBR-BPC
Csa2G365700.1	Csa4G075200.1	340	360	+	1.01e-06	ctatttctctttcttcatcta	BBR-BPC
Csa2G365700.1	Csa4G075200.1	989	1009	+	4.37e-06	ttatcactctctcccaccccc	BBR-BPC
Csa5G569350.1	Csa4G075200.1	1180	1199	-	7.62e-07	GAGAGAGAGAGAGAGAGTGG	GRAS
Csa5G569350.1	Csa4G075200.1	1182	1201	-	3.7e-07	GAGAGAGAGAGAGAGAGAGT	GRAS
Csa5G569350.1	Csa4G075200.1	1184	1203	-	9.37e-08	GAGAGAGAGAGAGAGAGAGA	GRAS
Csa5G569350.1	Csa4G075200.1	1186	1205	-	9.37e-08	GAGAGAGAGAGAGAGAGAGA	GRAS
Csa5G569350.1	Csa4G075200.1	1188	1207	-	1.24e-06	TAGAGAGAGAGAGAGAGAGA	GRAS
Csa5G569350.1	Csa4G075200.1	1192	1211	-	7.85e-07	GAGATAGAGAGAGAGAGAGA	GRAS
Csa5G569350.1	Csa4G075200.1	1238	1257	-	3.53e-07	GAGAGGGAGAGAGAGATAGG	GRAS
Csa5G569350.1	Csa4G075200.1	1244	1263	-	8.55e-06	AGGAGGGAGAGGGAGAGAGA	GRAS
Csa5G569350.1	Csa4G075200.1	1250	1269	-	2.86e-06	GAGAAAAGGAGGGAGAGGGA	GRAS
Csa5G569350.1	Csa4G075200.1	1396	1415	-	4.39e-06	CAGAGGAAGAAAAAGAGAGT	GRAS
Csa5G569350.1	Csa4G075200.1	1402	1421	-	7.02e-06	AAGAAACAGAGGAAGAAAAA	GRAS
Csa5G569350.1	Csa4G075200.1	760	779	+	9.92e-06	aaaaaaaaaagaaaagaaaa	GRAS
Csa5G569350.1	Csa4G075200.1	765	784	+	7.18e-06	aaaaagaaaagaaaagaaga	GRAS
Csa5G569350.1	Csa4G075200.1	846	865	+	4.9e-06	caagagaagagaagagaaga	GRAS
Csa5G569350.1	Csa4G075200.1	849	868	+	4.18e-06	gagaagagaagagaagagga	GRAS
Csa5G569350.1	Csa4G075200.1	851	870	+	6.54e-06	gaagagaagagaagaggaag	GRAS
Csa5G569350.1	Csa5G052540.1	1365	1384	-	6.87e-07	CAAAAGAGGACAGAAGAGGA	GRAS
Csa5G569350.1	Csa5G052540.1	34	53	-	9.81e-06	GAGGGCGAGACAAAATAATA	GRAS
Csa2G365700.1	Csa5G172270.1	370	390	-	7.85e-06	CTCTCCCTCTCTTTCCCCCAA	BBR-BPC
Csa2G365700.1	Csa5G172270.1	372	392	-	4.56e-06	TGCTCTCCCTCTCTTTCCCCC	BBR-BPC
Csa5G569350.1	Csa5G172270.1	1449	1468	-	1.14e-06	AAGAGGGTGACAAAAGAAAA	GRAS
Csa5G569350.1	Csa5G172270.1	374	393	+	8.75e-06	gggaaagagagggagagcag	GRAS
Csa2G365700.1	Csa6G075200.1	1182	1202	-	2.86e-06	TTCTTATTATTTCTCTCTTTC	BBR-BPC
Csa5G569350.1	Csa6G075200.1	1371	1390	-	6.39e-06	AGAGAAAAGCCAAAAGAAGG	GRAS
Csa5G569350.1	Csa6G075200.1	1378	1397	-	2.01e-08	GAGAAAAAGAGAAAAGCCAA	GRAS
Csa5G569350.1	Csa6G075200.1	1413	1432	-	4.5e-06	GGGAAAATGAGAGAAGGGAA	GRAS
Csa2G365700.1	Csa6G523390.1	295	315	+	8.32e-06	taatctctctctctttaaatt	BBR-BPC
Csa5G569350.1	Csa6G523390.1	262	281	-	7.27e-06	TAAAAAAAGAGAAAAAAACG	GRAS
Csa2G365700.1	Csa7G413380.1	1312	1332	+	6.94e-06	ctcttttctcccctctctctc	BBR-BPC
Csa2G365700.1	Csa7G413380.1	1314	1334	+	7.64e-07	cttttctcccctctctctctc	BBR-BPC
Csa2G365700.1	Csa7G413380.1	1316	1336	+	7.01e-06	tttctcccctctctctctcgt	BBR-BPC
Csa5G569350.1	Csa7G413380.1	1315	1334	-	9.05e-06	GAGAGAGAGAGGGGAGAAAA	GRAS
Csa2G365700.1	Csa7G434970.1	161	181	+	5.58e-09	ctctctatctctctatctctc	BBR-BPC
Csa2G365700.1	Csa7G434970.1	163	183	+	7.95e-10	ctctatctctctatctctcta	BBR-BPC
Csa2G365700.1	Csa7G434970.1	165	185	+	8.25e-09	ctatctctctatctctctatc	BBR-BPC
Csa2G365700.1	Csa7G434970.1	167	187	+	2.84e-09	atctctctatctctctatctc	BBR-BPC
Csa2G365700.1	Csa7G434970.1	169	189	+	1.77e-08	ctctctatctctctatctcta	BBR-BPC
Csa2G365700.1	Csa7G434970.1	171	191	+	5.31e-09	ctctatctctctatctctatc	BBR-BPC
Csa2G365700.1	Csa7G434970.1	173	193	+	1.58e-08	ctatctctctatctctatcta	BBR-BPC
Csa2G365700.1	Csa7G434970.1	175	195	+	5e-08	atctctctatctctatctatc	BBR-BPC
Csa2G365700.1	Csa7G434970.1	177	197	+	4.73e-07	ctctctatctctatctatcta	BBR-BPC
Csa2G365700.1	Csa7G434970.1	179	199	+	7.85e-08	ctctatctctatctatctatc	BBR-BPC
Csa2G365700.1	Csa7G434970.1	181	201	+	4.45e-07	ctatctctatctatctatcta	BBR-BPC
Csa2G365700.1	Csa7G434970.1	183	203	+	8.1e-06	atctctatctatctatctatc	BBR-BPC
Csa2G365700.1	Csa7G434970.1	185	205	+	1.67e-07	ctctatctatctatctatctc	BBR-BPC
Csa2G365700.1	Csa7G434970.1	30	50	-	1.85e-07	TCCTCTCTCTCTCTTTTCCTT	BBR-BPC
Csa2G365700.1	Csa7G434970.1	32	52	-	3.44e-06	TATCCTCTCTCTCTCTTTTCC	BBR-BPC
Csa2G365700.1	Csa7G434970.1	36	56	-	3.83e-06	TTTGTATCCTCTCTCTCTCTT	BBR-BPC
Csa2G365700.1	Csa7G434970.1	618	638	-	2.27e-06	CTCTCTTCCTCTCTTCCTAAA	BBR-BPC
Csa2G365700.1	Csa7G434970.1	620	640	-	1.11e-06	TCCTCTCTTCCTCTCTTCCTA	BBR-BPC
Csa2G365700.1	Csa7G434970.1	624	644	-	3e-06	CTCTTCCTCTCTTCCTCTCTT	BBR-BPC
Csa2G365700.1	Csa7G434970.1	626	646	-	2.44e-08	CACTCTTCCTCTCTTCCTCTC	BBR-BPC
Csa2G365700.1	Csa7G434970.1	628	648	-	2.11e-07	CTCACTCTTCCTCTCTTCCTC	BBR-BPC
Csa2G365700.1	Csa7G434970.1	630	650	-	1.98e-06	CTCTCACTCTTCCTCTCTTCC	BBR-BPC
Csa2G365700.1	Csa7G434970.1	632	652	-	2.59e-06	CCCTCTCACTCTTCCTCTCTT	BBR-BPC
Csa2G365700.1	Csa7G434970.1	634	654	-	5.44e-07	CCCCCTCTCACTCTTCCTCTC	BBR-BPC
Csa2G365700.1	Csa7G434970.1	636	656	-	4.7e-07	CCCCCCCTCTCACTCTTCCTC	BBR-BPC
Csa5G569350.1	Csa7G434970.1	1021	1040	-	3.38e-06	GACAAGAAAAGAAAGGGGAG	GRAS
Csa5G569350.1	Csa7G434970.1	1026	1045	-	8.85e-06	AAGGAGACAAGAAAAGAAAG	GRAS
Csa5G569350.1	Csa7G434970.1	1029	1048	-	2.55e-06	TGGAAGGAGACAAGAAAAGA	GRAS
Csa5G569350.1	Csa7G434970.1	104	123	+	1.79e-07	gagacaaagacaaaaaaaca	GRAS
Csa5G569350.1	Csa7G434970.1	30	49	+	3.88e-07	aaggaaaagagagagagagg	GRAS
Csa5G569350.1	Csa7G434970.1	620	639	+	5.54e-06	taggaagagaggaagagagg	GRAS
Csa5G569350.1	Csa7G434970.1	624	643	+	9.16e-06	aagagaggaagagaggaaga	GRAS
Csa5G569350.1	Csa7G434970.1	626	645	+	3.93e-06	gagaggaagagaggaagagt	GRAS
Csa5G569350.1	Csa7G434970.1	628	647	+	5.81e-06	gaggaagagaggaagagtga	GRAS
Csa5G569350.1	Csa7G434970.1	686	705	+	2.61e-06	gaagacaagacaaaggcaca	GRAS
Csa5G569350.1	Csa7G434970.1	98	117	+	1.56e-07	aagacagagacaaagacaaa	GRAS
Csa2G365700.1	Csa7G435470.1	637	657	+	3.67e-06	tctctgttctctctatctcta	BBR-BPC
Csa2G365700.1	Csa7G435470.1	867	887	-	4.99e-06	CTCATTTTCCTTATTTCTCTC	BBR-BPC
Csa5G569350.1	Csa7G435500.1	809	828	+	7.02e-06	aagacaatgacaaaaacaca	GRAS
Csa5G569350.1	Csa7G435500.1	975	994	-	5.09e-06	GACAAGACAAGAAAGGAGGA	GRAS
