# Supplementary material for: Comprehensive Analysis of Cucumber Gibberellin Oxidase Family Genes and Functional Characterization of CsGA20ox1 in Root Development in Arabidopsis
Source: Int J Mol Sci. 2018 Oct 12;19(10):3135. doi: 10.3390/ijms19103135 (PMC6213227; doi:10.3390/ijms19103135)
Supplement: Supplementary file 1 [file ijms-19-03135-s001.zip › Table S3.xls]

## Sheet: Sheet1
Table S3 BBR/BPC (Matrix_id MP00253 and MP00540) and GRAS (Matrix_id MP00611) TF binding motifs in all CsGAoxs promoters identified by FIMO
Gene ID	Start	End	Strand	Alias	pvalue	qvalue	Sequence
Csa1G033040.1	152	175	-	MP00253	6.59e-05	0.0102	AAAAGAAAGAAACAGACACAGCAA
Csa1G033040.1	156	179	-	MP00253	9.92e-06	0.00312	CAGTAAAAGAAAGAAACAGACACA
Csa1G033040.1	160	183	-	MP00253	1.24e-06	0.000687	AAGACAGTAAAAGAAAGAAACAGA
Csa1G033040.1	162	185	-	MP00253	7.35e-05	0.0107	ACAAGACAGTAAAAGAAAGAAACA
Csa1G033040.1	269	292	+	MP00253	2.32e-05	0.00533	tatgaagagagaaaaataaaatgt
Csa1G033040.1	1099	1122	+	MP00253	9.32e-05	0.0128	ttaaaaaagaaaaaaagaaaaggg
Csa1G033040.1	1101	1124	+	MP00253	2e-05	0.00491	aaaaaagaaaaaaagaaaagggaa
Csa1G033040.1	1103	1126	+	MP00253	5.36e-05	0.00916	aaaagaaaaaaagaaaagggaaaa
Csa1G033040.1	1105	1128	+	MP00253	2.54e-05	0.0056	aagaaaaaaagaaaagggaaaatt
Csa1G033040.1	155	175	+	MP00540	3.07e-06	0.00215	ctgtgtctgtttctttctttt
Csa1G033040.1	159	179	+	MP00540	4.17e-05	0.0109	gtctgtttctttcttttactg
Csa1G033040.1	241	261	+	MP00540	2.53e-05	0.00787	attatgttctctctttgtatc
Csa1G033040.1	267	287	-	MP00540	4.81e-05	0.0117	TTATTTTTCTCTCTTCATACA
Csa1G033040.1	269	289	-	MP00540	2.33e-05	0.0077	TTTTATTTTTCTCTCTTCATA
Csa1G033040.1	1099	1119	-	MP00540	8.79e-05	0.0171	TTTTCTTTTTTTCTTTTTTAA
Csa1G033040.1	1359	1379	-	MP00540	1.15e-05	0.00512	TAGACTCTCTCTATATATATA
Csa1G033040.1	1363	1383	-	MP00540	4.27e-05	0.011	CTAGTAGACTCTCTCTATATA
Csa1G033040.1	112	131	+	MP00611	8.06e-05	0.0134	cagggaaaaagaaatgtagt
Csa1G033040.1	150	169	-	MP00611	5.25e-06	0.00308	AAGAAACAGACACAGCAAAA
Csa1G033040.1	154	173	-	MP00611	1.39e-05	0.00527	AAGAAAGAAACAGACACAGC
Csa1G033040.1	160	179	-	MP00611	3.15e-06	0.00221	CAGTAAAAGAAAGAAACAGA
Csa1G033040.1	162	181	-	MP00611	8.2e-05	0.0135	GACAGTAAAAGAAAGAAACA
Csa1G033040.1	269	288	+	MP00611	1.75e-05	0.00586	tatgaagagagaaaaataaa
Csa1G033040.1	494	513	-	MP00611	3.52e-07	0.00143	AAGAAAAAGACAAATCTAGA
Csa1G033040.1	1039	1058	-	MP00611	6.08e-05	0.0116	AAATAAAAAAGAAAATTATG
Csa1G033040.1	1099	1118	+	MP00611	2.92e-05	0.00795	ttaaaaaagaaaaaaagaaa
Csa1G033040.1	1100	1119	+	MP00611	3.18e-05	0.00817	taaaaaagaaaaaaagaaaa
Csa1G033040.1	1101	1120	+	MP00611	1.61e-05	0.0057	aaaaaagaaaaaaagaaaag
Csa1G033040.1	1102	1121	+	MP00611	7.86e-05	0.0133	aaaaagaaaaaaagaaaagg
Csa1G033040.1	1103	1122	+	MP00611	7.39e-05	0.0129	aaaagaaaaaaagaaaaggg
Csa1G033040.1	1105	1124	+	MP00611	1.67e-07	0.000966	aagaaaaaaagaaaagggaa
Csa1G033040.1	1107	1126	+	MP00611	7.42e-06	0.00369	gaaaaaaagaaaagggaaaa
Csa1G033040.1	1183	1202	+	MP00611	6.41e-05	0.0118	acatgaaaaacaaaggcaaa
Csa1G033050.1	692	715	+	MP00253	6.1e-05	0.00962	ataaaaaaaacataaaaagagaga
Csa1G033050.1	694	717	+	MP00253	7.76e-05	0.0111	aaaaaaaacataaaaagagagaga
Csa1G033050.1	696	719	+	MP00253	1.27e-06	0.000694	aaaaaacataaaaagagagagaaa
Csa1G033050.1	698	721	+	MP00253	9.62e-06	0.00305	aaaacataaaaagagagagaaaac
Csa1G033050.1	700	723	+	MP00253	2.39e-06	0.00108	aacataaaaagagagagaaaacaa
Csa1G033050.1	702	725	+	MP00253	7.74e-06	0.00261	cataaaaagagagagaaaacaaac
Csa1G033050.1	723	746	+	MP00253	9.83e-05	0.013	aacaaacaaacagaaagttagagc
Csa1G033050.1	811	834	-	MP00253	8.87e-05	0.0123	GAGAAAAAGACATGAAATAAGCGT
Csa1G033050.1	825	848	-	MP00253	6.16e-05	0.00967	AGTAAATAAACATGGAGAAAAAGA
Csa1G033050.1	696	716	-	MP00540	7.98e-05	0.0166	CTCTCTCTTTTTATGTTTTTT
Csa1G033050.1	698	718	-	MP00540	1.55e-05	0.00601	TTCTCTCTCTTTTTATGTTTT
Csa1G033050.1	704	724	-	MP00540	2.71e-06	0.00199	TTTGTTTTCTCTCTCTTTTTA
Csa1G033050.1	708	728	-	MP00540	2.48e-05	0.00781	TTTGTTTGTTTTCTCTCTCTT
Csa1G033050.1	822	842	+	MP00540	2.02e-05	0.0071	atgtctttttctccatgttta
Csa1G033050.1	193	212	-	MP00611	9.1e-05	0.0142	GACAAAAAAAAGAAGCAAGA
Csa1G033050.1	418	437	+	MP00611	2.33e-05	0.00697	aagatatagacaaaataaat
Csa1G033050.1	700	719	+	MP00611	2.65e-05	0.00761	aacataaaaagagagagaaa
Csa1G033050.1	702	721	+	MP00611	1.17e-05	0.00468	cataaaaagagagagaaaac
Csa1G033050.1	704	723	+	MP00611	6.36e-06	0.00334	taaaaagagagagaaaacaa
Csa1G033050.1	706	725	+	MP00611	2.36e-06	0.00185	aaaagagagagaaaacaaac
Csa1G033050.1	708	727	+	MP00611	8.94e-05	0.0142	aagagagagaaaacaaacaa
Csa1G033050.1	715	734	+	MP00611	9.5e-05	0.0146	agaaaacaaacaaacaaaca
Csa1G033050.1	719	738	+	MP00611	1.36e-05	0.00524	aacaaacaaacaaacagaaa
Csa1G033050.1	815	834	-	MP00611	3.81e-05	0.00916	GAGAAAAAGACATGAAATAA
Csa1G033050.1	1282	1301	-	MP00611	2.81e-05	0.00792	CCAAAAAAGAGAAAACAATC
Csa1G064730.1	63	86	+	MP00253	4.12e-05	0.0075	aagaaaaataaaaggaataaatga
Csa1G064730.1	646	669	-	MP00253	6.68e-05	0.0103	AAAAGGTAGAAAGGGGAAGTCAAA
Csa1G064730.1	653	676	-	MP00253	4.12e-05	0.0075	GAGAAAGAAAAGGTAGAAAGGGGA
Csa1G064730.1	657	680	-	MP00253	1.85e-06	0.000929	GAGAGAGAAAGAAAAGGTAGAAAG
Csa1G064730.1	659	682	-	MP00253	9.02e-07	0.000563	GAGAGAGAGAAAGAAAAGGTAGAA
Csa1G064730.1	661	684	-	MP00253	2.28e-08	2.99e-05	GAGAGAGAGAGAAAGAAAAGGTAG
Csa1G064730.1	663	686	-	MP00253	4.4e-09	9e-06	GTGAGAGAGAGAGAAAGAAAAGGT
Csa1G064730.1	665	688	-	MP00253	1.14e-07	0.000112	TTGTGAGAGAGAGAGAAAGAAAAG
Csa1G064730.1	667	690	-	MP00253	9.53e-07	0.000576	AATTGTGAGAGAGAGAGAAAGAAA
Csa1G064730.1	669	692	-	MP00253	4.57e-06	0.00182	AAAATTGTGAGAGAGAGAGAAAGA
Csa1G064730.1	671	694	-	MP00253	6.08e-07	0.000427	AAAAAATTGTGAGAGAGAGAGAAA
Csa1G064730.1	673	696	-	MP00253	1.08e-06	0.000612	AAAAAAAATTGTGAGAGAGAGAGA
Csa1G064730.1	675	698	-	MP00253	6.62e-05	0.0102	TGAAAAAAAATTGTGAGAGAGAGA
Csa1G064730.1	1204	1227	+	MP00253	7.38e-05	0.0107	gattgaatttgagaagaagaaaaa
Csa1G064730.1	1217	1240	+	MP00253	9.96e-05	0.0131	aagaagaaaaaggagggtgaaaat
Csa1G064730.1	658	678	+	MP00540	2.73e-05	0.00832	tttctaccttttctttctctc
Csa1G064730.1	660	680	+	MP00540	7.36e-05	0.0156	tctaccttttctttctctctc
Csa1G064730.1	662	682	+	MP00540	2.87e-08	4.74e-05	taccttttctttctctctctc
Csa1G064730.1	664	684	+	MP00540	6.12e-09	1.67e-05	ccttttctttctctctctctc
Csa1G064730.1	666	686	+	MP00540	1.16e-08	2.56e-05	ttttctttctctctctctcac
Csa1G064730.1	668	688	+	MP00540	1.23e-08	2.56e-05	ttctttctctctctctcacaa
Csa1G064730.1	670	690	+	MP00540	2.68e-07	0.000314	ctttctctctctctcacaatt
Csa1G064730.1	672	692	+	MP00540	5.53e-06	0.00307	ttctctctctctcacaatttt
Csa1G064730.1	674	694	+	MP00540	2.28e-05	0.00762	ctctctctctcacaatttttt
Csa1G064730.1	1208	1228	-	MP00540	8.76e-05	0.0171	CTTTTTCTTCTTCTCAAATTC
Csa1G064730.1	1312	1332	-	MP00540	1.61e-05	0.00619	ATCTTGTTTTTTCTTTTTCTT
Csa1G064730.1	61	80	+	MP00611	4.1e-05	0.00943	gaaagaaaaataaaaggaat
Csa1G064730.1	372	391	+	MP00611	5.49e-06	0.0031	aagaagcaaacaaaaaatag
Csa1G064730.1	659	678	-	MP00611	3.03e-05	0.00795	GAGAGAAAGAAAAGGTAGAA
Csa1G064730.1	661	680	-	MP00611	5.07e-06	0.00301	GAGAGAGAAAGAAAAGGTAG
Csa1G064730.1	663	682	-	MP00611	1.09e-05	0.00459	GAGAGAGAGAAAGAAAAGGT
Csa1G064730.1	665	684	-	MP00611	8.36e-08	0.000854	GAGAGAGAGAGAAAGAAAAG
Csa1G064730.1	667	686	-	MP00611	7.76e-06	0.00381	GTGAGAGAGAGAGAAAGAAA
Csa1G064730.1	1214	1233	+	MP00611	1.19e-06	0.00185	gagaagaagaaaaaggaggg
Csa1G064730.1	1301	1320	+	MP00611	3.99e-05	0.00926	caaagacaaacaagaaaaag
Csa1G064730.1	1306	1325	+	MP00611	6.83e-05	0.0121	acaaacaagaaaaagaaaaa
Csa1G064730.1	1310	1329	+	MP00611	4.94e-05	0.0104	acaagaaaaagaaaaaacaa
Csa1G064730.1	1312	1331	+	MP00611	1.12e-07	0.000854	aagaaaaagaaaaaacaaga
Csa1G064730.1	1317	1336	+	MP00611	7.13e-05	0.0125	aaagaaaaaacaagatcaac
Csa1G064730.1	1334	1353	+	MP00611	2.86e-05	0.00795	aacataaagaaaagaaaaag
Csa1G064730.1	1337	1356	+	MP00611	9.42e-05	0.0145	ataaagaaaagaaaaagggt
Csa1G064730.1	1411	1430	-	MP00611	7.59e-05	0.013	TATAAGAAGACAAAGTAATC
Csa1G439830.1	459	482	+	MP00253	1.48e-05	0.00416	aaaaaaaagaaaagaaaagaaaaa
Csa1G439830.1	461	484	+	MP00253	1.64e-05	0.00436	aaaaaagaaaagaaaagaaaaaga
Csa1G439830.1	463	486	+	MP00253	3.46e-05	0.00679	aaaagaaaagaaaagaaaaagaaa
Csa1G439830.1	465	488	+	MP00253	2.46e-06	0.00109	aagaaaagaaaagaaaaagaaaaa
Csa1G439830.1	467	490	+	MP00253	1.21e-06	0.000677	gaaaagaaaagaaaaagaaaaaga
Csa1G439830.1	469	492	+	MP00253	8.84e-06	0.00282	aaagaaaagaaaaagaaaaagaaa
Csa1G439830.1	471	494	+	MP00253	7.62e-06	0.0026	agaaaagaaaaagaaaaagaaaaa
Csa1G439830.1	473	496	+	MP00253	2.53e-07	0.000203	aaaagaaaaagaaaaagaaaaaga
Csa1G439830.1	475	498	+	MP00253	4.76e-07	0.00034	aagaaaaagaaaaagaaaaagaag
Csa1G439830.1	477	500	+	MP00253	2.39e-06	0.00108	gaaaaagaaaaagaaaaagaagaa
Csa1G439830.1	479	502	+	MP00253	1.66e-05	0.00436	aaaagaaaaagaaaaagaagaaac
Csa1G439830.1	481	504	+	MP00253	1.97e-05	0.00487	aagaaaaagaaaaagaagaaacgt
Csa1G439830.1	483	506	+	MP00253	5.88e-05	0.00943	gaaaaagaaaaagaagaaacgtca
Csa1G439830.1	652	675	-	MP00253	4.51e-05	0.00802	GAAAAGAAAAGAAAAGAAAAGAAG
Csa1G439830.1	654	677	-	MP00253	1.49e-05	0.00416	AAGAAAAGAAAAGAAAAGAAAAGA
Csa1G439830.1	657	680	-	MP00253	1.69e-05	0.00436	GAAAAGAAAAGAAAAGAAAAGAAA
Csa1G439830.1	659	682	-	MP00253	1.49e-05	0.00416	AAGAAAAGAAAAGAAAAGAAAAGA
Csa1G439830.1	662	685	-	MP00253	1.69e-05	0.00436	GAAAAGAAAAGAAAAGAAAAGAAA
Csa1G439830.1	664	687	-	MP00253	1.49e-05	0.00416	AAGAAAAGAAAAGAAAAGAAAAGA
Csa1G439830.1	667	690	-	MP00253	1.69e-05	0.00436	GAAAAGAAAAGAAAAGAAAAGAAA
Csa1G439830.1	669	692	-	MP00253	1.49e-05	0.00416	AAGAAAAGAAAAGAAAAGAAAAGA
Csa1G439830.1	672	695	-	MP00253	3.95e-05	0.00736	AAAAAGAAAAGAAAAGAAAAGAAA
Csa1G439830.1	675	698	-	MP00253	6.87e-05	0.0103	GTAAAAAAGAAAAGAAAAGAAAAG
Csa1G439830.1	677	700	-	MP00253	1.13e-05	0.00346	GGGTAAAAAAGAAAAGAAAAGAAA
Csa1G439830.1	801	824	-	MP00253	5.19e-05	0.00898	AAGAAAGAAAAAGAAAAATTGGAC
Csa1G439830.1	803	826	-	MP00253	7.07e-06	0.00248	GAAAGAAAGAAAAAGAAAAATTGG
Csa1G439830.1	805	828	-	MP00253	4.38e-07	0.000319	GGGAAAGAAAGAAAAAGAAAAATT
Csa1G439830.1	807	830	-	MP00253	3.58e-06	0.00148	TTGGGAAAGAAAGAAAAAGAAAAA
Csa1G439830.1	809	832	-	MP00253	9.88e-07	0.000586	AATTGGGAAAGAAAGAAAAAGAAA
Csa1G439830.1	811	834	-	MP00253	8.64e-05	0.0121	AAAATTGGGAAAGAAAGAAAAAGA
Csa1G439830.1	459	479	-	MP00540	4.62e-05	0.0114	TTCTTTTCTTTTCTTTTTTTT
Csa1G439830.1	469	489	-	MP00540	4.71e-05	0.0115	CTTTTTCTTTTTCTTTTCTTT
Csa1G439830.1	473	493	-	MP00540	7.6e-05	0.0159	TTTTCTTTTTCTTTTTCTTTT
Csa1G439830.1	475	495	-	MP00540	3.29e-06	0.00224	CTTTTTCTTTTTCTTTTTCTT
Csa1G439830.1	477	497	-	MP00540	1.19e-05	0.00512	TTCTTTTTCTTTTTCTTTTTC
Csa1G439830.1	481	501	-	MP00540	2.75e-05	0.00832	TTTCTTCTTTTTCTTTTTCTT
Csa1G439830.1	678	698	+	MP00540	9.04e-05	0.0174	ttcttttcttttcttttttac
Csa1G439830.1	802	822	+	MP00540	9.78e-05	0.0184	tccaatttttctttttctttc
Csa1G439830.1	804	824	+	MP00540	3.6e-05	0.0101	caatttttctttttctttctt
Csa1G439830.1	806	826	+	MP00540	1.31e-06	0.00121	atttttctttttctttctttc
Csa1G439830.1	808	828	+	MP00540	7.36e-05	0.0156	ttttctttttctttctttccc
Csa1G439830.1	810	830	+	MP00540	1.47e-06	0.0013	ttctttttctttctttcccaa
Csa1G439830.1	814	834	+	MP00540	3.93e-05	0.0105	ttttctttctttcccaatttt
Csa1G439830.1	1057	1077	+	MP00540	8.85e-05	0.0171	tattatttttttctttatata
Csa1G439830.1	1061	1081	+	MP00540	6.98e-05	0.0153	atttttttctttatatatatt
Csa1G439830.1	1372	1392	-	MP00540	7.47e-05	0.0157	CTATTATTTTCTCTTTGCTTT
Csa1G439830.1	457	476	+	MP00611	1.68e-05	0.00586	ttaaaaaaaagaaaagaaaa
Csa1G439830.1	459	478	+	MP00611	3.63e-06	0.00237	aaaaaaaagaaaagaaaaga
Csa1G439830.1	460	479	+	MP00611	9.02e-05	0.0142	aaaaaaagaaaagaaaagaa
Csa1G439830.1	461	480	+	MP00611	7.45e-05	0.0129	aaaaaagaaaagaaaagaaa
Csa1G439830.1	462	481	+	MP00611	5.95e-07	0.00143	aaaaagaaaagaaaagaaaa
Csa1G439830.1	464	483	+	MP00611	2.65e-05	0.00761	aaagaaaagaaaagaaaaag
Csa1G439830.1	465	484	+	MP00611	1.34e-05	0.00518	aagaaaagaaaagaaaaaga
Csa1G439830.1	467	486	+	MP00611	1.09e-06	0.00185	gaaaagaaaagaaaaagaaa
Csa1G439830.1	469	488	+	MP00611	3.54e-06	0.00237	aaagaaaagaaaaagaaaaa
Csa1G439830.1	470	489	+	MP00611	4.59e-05	0.0101	aagaaaagaaaaagaaaaag
Csa1G439830.1	471	490	+	MP00611	6.47e-05	0.0118	agaaaagaaaaagaaaaaga
Csa1G439830.1	473	492	+	MP00611	1.23e-06	0.00185	aaaagaaaaagaaaaagaaa
Csa1G439830.1	475	494	+	MP00611	9.08e-08	0.000854	aagaaaaagaaaaagaaaaa
Csa1G439830.1	477	496	+	MP00611	1.95e-05	0.00637	gaaaaagaaaaagaaaaaga
Csa1G439830.1	479	498	+	MP00611	1.94e-06	0.00185	aaaagaaaaagaaaaagaag
Csa1G439830.1	481	500	+	MP00611	2.91e-07	0.00143	aagaaaaagaaaaagaagaa
Csa1G439830.1	483	502	+	MP00611	6.3e-05	0.0118	gaaaaagaaaaagaagaaac
Csa1G439830.1	485	504	+	MP00611	8.35e-05	0.0136	aaaagaaaaagaagaaacgt
Csa1G439830.1	487	506	+	MP00611	6.83e-05	0.0121	aagaaaaagaagaaacgtca
Csa1G439830.1	648	667	-	MP00611	5.03e-05	0.0105	AAGAAAAGAAAAGAAGTAGT
Csa1G439830.1	651	670	-	MP00611	1.52e-06	0.00185	GAAAAGAAAAGAAAAGAAGT
Csa1G439830.1	653	672	-	MP00611	3e-05	0.00795	AAGAAAAGAAAAGAAAAGAA
Csa1G439830.1	654	673	-	MP00611	1.75e-05	0.00586	AAAGAAAAGAAAAGAAAAGA
Csa1G439830.1	656	675	-	MP00611	5.4e-07	0.00143	GAAAAGAAAAGAAAAGAAAA
Csa1G439830.1	658	677	-	MP00611	3e-05	0.00795	AAGAAAAGAAAAGAAAAGAA
Csa1G439830.1	659	678	-	MP00611	1.75e-05	0.00586	AAAGAAAAGAAAAGAAAAGA
Csa1G439830.1	661	680	-	MP00611	5.4e-07	0.00143	GAAAAGAAAAGAAAAGAAAA
Csa1G439830.1	663	682	-	MP00611	3e-05	0.00795	AAGAAAAGAAAAGAAAAGAA
Csa1G439830.1	664	683	-	MP00611	1.75e-05	0.00586	AAAGAAAAGAAAAGAAAAGA
Csa1G439830.1	666	685	-	MP00611	5.4e-07	0.00143	GAAAAGAAAAGAAAAGAAAA
Csa1G439830.1	668	687	-	MP00611	3e-05	0.00795	AAGAAAAGAAAAGAAAAGAA
Csa1G439830.1	669	688	-	MP00611	1.75e-05	0.00586	AAAGAAAAGAAAAGAAAAGA
Csa1G439830.1	671	690	-	MP00611	5.4e-07	0.00143	GAAAAGAAAAGAAAAGAAAA
Csa1G439830.1	673	692	-	MP00611	3e-05	0.00795	AAGAAAAGAAAAGAAAAGAA
Csa1G439830.1	674	693	-	MP00611	1.75e-05	0.00586	AAAGAAAAGAAAAGAAAAGA
Csa1G439830.1	676	695	-	MP00611	5.95e-07	0.00143	AAAAAGAAAAGAAAAGAAAA
Csa1G439830.1	677	696	-	MP00611	7.45e-05	0.0129	AAAAAAGAAAAGAAAAGAAA
Csa1G439830.1	679	698	-	MP00611	5.07e-05	0.0105	GTAAAAAAGAAAAGAAAAGA
Csa1G439830.1	681	700	-	MP00611	1.71e-06	0.00185	GGGTAAAAAAGAAAAGAAAA
Csa1G439830.1	801	820	-	MP00611	6.53e-05	0.0119	AAGAAAAAGAAAAATTGGAC
Csa1G439830.1	803	822	-	MP00611	1.12e-05	0.00465	GAAAGAAAAAGAAAAATTGG
Csa1G439830.1	805	824	-	MP00611	5.81e-05	0.0113	AAGAAAGAAAAAGAAAAATT
Csa1G439830.1	807	826	-	MP00611	1.64e-06	0.00185	GAAAGAAAGAAAAAGAAAAA
Csa1G439830.1	809	828	-	MP00611	8.04e-07	0.00153	GGGAAAGAAAGAAAAAGAAA
Csa1G439830.1	987	1006	-	MP00611	7.01e-05	0.0124	AAAATAAGGAAAAAATAGAG
Csa1G439830.1	1037	1056	-	MP00611	5.41e-05	0.0107	TAAATAATGAGAAAATTAAA
Csa1G439830.1	1372	1391	+	MP00611	2.01e-05	0.00642	aaagcaaagagaaaataata
Csa1G439830.1	1478	1497	-	MP00611	8.06e-05	0.0134	TAAGAAAAGAGGAAGCAGAA
Csa2G379300.1	378	401	+	MP00253	6.88e-06	0.00246	aagaaaaaaaaagaaagatatata
Csa2G379300.1	374	397	+	MP00253	8.38e-06	0.00275	aaagaagaaaaaaaaagaaagata
Csa2G379300.1	1256	1279	+	MP00253	1.2e-05	0.00362	gagaaaaagaattaaaaaaaaaaa
Csa2G379300.1	368	391	+	MP00253	1.39e-05	0.0041	gagaagaaagaagaaaaaaaaaga
Csa2G379300.1	1254	1277	+	MP00253	1.67e-05	0.00436	atgagaaaaagaattaaaaaaaaa
Csa2G379300.1	372	395	+	MP00253	2.03e-05	0.00494	agaaagaagaaaaaaaaagaaaga
Csa2G379300.1	1461	1484	-	MP00253	2.13e-05	0.0051	AACAGATTTAGAGTGGTAGAAAGG
Csa2G379300.1	1157	1180	-	MP00253	2.14e-05	0.0051	AATAAAAAGAAAAAAGAAAAAAGT
Csa2G379300.1	370	393	+	MP00253	2.68e-05	0.00578	gaagaaagaagaaaaaaaaagaaa
Csa2G379300.1	366	389	+	MP00253	2.73e-05	0.00583	aagagaagaaagaagaaaaaaaaa
Csa2G379300.1	376	399	+	MP00253	2.84e-05	0.00595	agaagaaaaaaaaagaaagatata
Csa2G379300.1	364	387	+	MP00253	5.54e-05	0.00919	aaaagagaagaaagaagaaaaaaa
Csa2G379300.1	380	403	+	MP00253	6.96e-05	0.0104	gaaaaaaaaagaaagatatatatt
Csa2G379300.1	1161	1184	-	MP00253	8.95e-05	0.0124	AAAAAATAAAAAGAAAAAAGAAAA
Csa2G379300.1	1454	1474	+	MP00540	5.33e-05	0.0125	ttcatctcctttctaccactc
Csa2G379300.1	378	398	-	MP00540	6.08e-05	0.0136	ATATCTTTCTTTTTTTTTCTT
Csa2G379300.1	1363	1382	-	MP00611	1.27e-06	0.00185	AAGAAAGGGACAAAACATGT
Csa2G379300.1	1161	1180	-	MP00611	1.98e-06	0.00185	AATAAAAAGAAAAAAGAAAA
Csa2G379300.1	375	394	+	MP00611	2.22e-06	0.00185	aagaagaaaaaaaaagaaag
Csa2G379300.1	372	391	+	MP00611	2.97e-06	0.00212	agaaagaagaaaaaaaaaga
Csa2G379300.1	760	779	-	MP00611	3.38e-06	0.00231	AAAGAAAAGACAAGAGGAGT
Csa2G379300.1	1163	1182	-	MP00611	4.68e-06	0.00293	AAAATAAAAAGAAAAAAGAA
Csa2G379300.1	380	399	+	MP00611	5.81e-06	0.00316	gaaaaaaaaagaaagatata
Csa2G379300.1	370	389	+	MP00611	6.95e-06	0.00361	gaagaaagaagaaaaaaaaa
Csa2G379300.1	444	463	+	MP00611	1.03e-05	0.00456	gcctaagagacaaaaaaaac
Csa2G379300.1	365	384	+	MP00611	1.76e-05	0.00588	aaagagaagaaagaagaaaa
Csa2G379300.1	378	397	+	MP00611	2.2e-05	0.00661	aagaaaaaaaaagaaagata
Csa2G379300.1	369	388	+	MP00611	3.5e-05	0.00874	agaagaaagaagaaaaaaaa
Csa2G379300.1	374	393	+	MP00611	3.6e-05	0.00889	aaagaagaaaaaaaaagaaa
Csa2G379300.1	1156	1175	-	MP00611	3.7e-05	0.009	AAAGAAAAAAGAAAAAAGTT
Csa2G379300.1	1158	1177	-	MP00611	3.88e-05	0.00919	AAAAAGAAAAAAGAAAAAAG
Csa2G379300.1	376	395	+	MP00611	4.34e-05	0.00977	agaagaaaaaaaaagaaaga
Csa2G379300.1	363	382	+	MP00611	5.21e-05	0.0106	taaaagagaagaaagaagaa
Csa2G379300.1	373	392	+	MP00611	5.41e-05	0.0107	gaaagaagaaaaaaaaagaa
Csa2G379300.1	968	987	-	MP00611	5.41e-05	0.0107	AAAAAAATTACAAAATTAAA
Csa2G379300.1	1154	1173	-	MP00611	6.47e-05	0.0118	AGAAAAAAGAAAAAAGTTTG
Csa2G379300.1	245	264	+	MP00611	6.76e-05	0.0121	taaaaatagacaaaataata
Csa2G379300.1	1167	1186	-	MP00611	9.02e-05	0.0142	TAAAAAAATAAAAAGAAAAA
Csa2G379300.1	367	386	+	MP00611	9.83e-05	0.0149	agagaagaaagaagaaaaaa
Csa3G179110.1	775	798	-	MP00253	1.55e-05	0.00428	GAGAGAGGGCAAAGAGGATAAACA
Csa3G179110.1	777	800	-	MP00253	2.82e-05	0.00595	GAGAGAGAGGGCAAAGAGGATAAA
Csa3G179110.1	1299	1322	+	MP00253	3.73e-05	0.00712	atgtgaaaaagaaataaagtaata
Csa3G179110.1	785	808	-	MP00253	4.45e-05	0.00794	ATTTGGAAGAGAGAGAGGGCAAAG
Csa3G179110.1	781	804	-	MP00253	4.91e-05	0.00857	GGAAGAGAGAGAGGGCAAAGAGGA
Csa3G179110.1	1301	1324	+	MP00253	8.87e-05	0.0123	gtgaaaaagaaataaagtaatacg
Csa3G179110.1	784	804	+	MP00540	7.41e-06	0.00381	tctttgccctctctctcttcc
Csa3G179110.1	782	802	+	MP00540	1.71e-05	0.00644	cctctttgccctctctctctt
Csa3G179110.1	786	806	+	MP00540	2.41e-05	0.00776	tttgccctctctctcttccaa
Csa3G179110.1	790	810	+	MP00540	7.21e-05	0.0155	ccctctctctcttccaaattc
Csa3G179110.1	923	943	+	MP00540	8.23e-05	0.0168	tttttttcttttatatctttc
Csa3G179110.1	1175	1194	+	MP00611	1.54e-05	0.00556	agcaacacaacaaaagaagg
Csa4G075200.1	1182	1205	-	MP00253	5.15e-14	1.2e-09	GAGAGAGAGAGAGAGAGAGAGAGT
Csa4G075200.1	1186	1209	-	MP00253	7.91e-14	1.2e-09	GATAGAGAGAGAGAGAGAGAGAGA
Csa4G075200.1	1184	1207	-	MP00253	1.25e-13	1.2e-09	TAGAGAGAGAGAGAGAGAGAGAGA
Csa4G075200.1	1190	1213	-	MP00253	1.33e-13	1.2e-09	GAGAGATAGAGAGAGAGAGAGAGA
Csa4G075200.1	1188	1211	-	MP00253	1.52e-13	1.2e-09	GAGATAGAGAGAGAGAGAGAGAGA
Csa4G075200.1	1180	1203	-	MP00253	6.18e-13	4.05e-09	GAGAGAGAGAGAGAGAGAGAGTGG
Csa4G075200.1	1192	1215	-	MP00253	8.28e-11	4.65e-07	TGGAGAGATAGAGAGAGAGAGAGA
Csa4G075200.1	1178	1201	-	MP00253	2.54e-10	9.99e-07	GAGAGAGAGAGAGAGAGAGTGGTT
Csa4G075200.1	1242	1265	-	MP00253	2.41e-09	6.3e-06	AAAGGAGGGAGAGGGAGAGAGAGA
Csa4G075200.1	1236	1259	-	MP00253	2.81e-09	6.91e-06	GGGAGAGGGAGAGAGAGATAGGGG
Csa4G075200.1	1240	1263	-	MP00253	4.58e-09	9e-06	AGGAGGGAGAGGGAGAGAGAGATA
Csa4G075200.1	1234	1257	-	MP00253	7.73e-09	1.41e-05	GAGAGGGAGAGAGAGATAGGGGTG
Csa4G075200.1	1238	1261	-	MP00253	8.1e-09	1.41e-05	GAGGGAGAGGGAGAGAGAGATAGG
Csa4G075200.1	1248	1271	-	MP00253	8.23e-09	1.41e-05	GAGAGAAAAGGAGGGAGAGGGAGA
Csa4G075200.1	1246	1269	-	MP00253	1.35e-08	2.12e-05	GAGAAAAGGAGGGAGAGGGAGAGA
Csa4G075200.1	1244	1267	-	MP00253	1.87e-08	2.62e-05	GAAAAGGAGGGAGAGGGAGAGAGA
Csa4G075200.1	1250	1273	-	MP00253	3.21e-08	3.94e-05	AAGAGAGAAAAGGAGGGAGAGGGA
Csa4G075200.1	1176	1199	-	MP00253	4.41e-08	5.1e-05	GAGAGAGAGAGAGAGAGTGGTTTT
Csa4G075200.1	1390	1413	-	MP00253	5.78e-08	6.31e-05	GAGGAAGAAAAAGAGAGTGTGAGA
Csa4G075200.1	1194	1217	-	MP00253	7.55e-08	8.02e-05	TTTGGAGAGATAGAGAGAGAGAGA
Csa4G075200.1	1196	1219	-	MP00253	9.7e-08	9.77e-05	GTTTTGGAGAGATAGAGAGAGAGA
Csa4G075200.1	331	354	-	MP00253	1.24e-07	0.000117	AAGAAAGAGAAATAGAGAGTGATT
Csa4G075200.1	335	358	-	MP00253	1.25e-07	0.000117	GATGAAGAAAGAGAAATAGAGAGT
Csa4G075200.1	1398	1421	-	MP00253	1.38e-07	0.000126	AAGAAACAGAGGAAGAAAAAGAGA
Csa4G075200.1	1392	1415	-	MP00253	1.82e-07	0.000159	CAGAGGAAGAAAAAGAGAGTGTGA
Csa4G075200.1	1394	1417	-	MP00253	2.12e-07	0.000177	AACAGAGGAAGAAAAAGAGAGTGT
Csa4G075200.1	333	356	-	MP00253	4.04e-07	0.000305	TGAAGAAAGAGAAATAGAGAGTGA
Csa4G075200.1	1232	1255	-	MP00253	6.55e-07	0.000452	GAGGGAGAGAGAGATAGGGGTGAA
Csa4G075200.1	337	360	-	MP00253	8.43e-07	0.00055	TAGATGAAGAAAGAGAAATAGAGA
Csa4G075200.1	1326	1349	+	MP00253	9.41e-07	0.000576	gaaaaagaaaaagaaataaaggga
Csa4G075200.1	1252	1275	-	MP00253	1.04e-06	0.000599	ATAAGAGAGAAAAGGAGGGAGAGG
Csa4G075200.1	1324	1347	+	MP00253	1.44e-06	0.000776	aagaaaaagaaaaagaaataaagg
Csa4G075200.1	1282	1305	-	MP00253	1.92e-06	0.000955	GATAGAAGGAAGGAGAGAATGAGG
Csa4G075200.1	1396	1419	-	MP00253	2.75e-06	0.0012	GAAACAGAGGAAGAAAAAGAGAGT
Csa4G075200.1	1386	1409	-	MP00253	2.83e-06	0.00121	AAGAAAAAGAGAGTGTGAGAGATT
Csa4G075200.1	255	278	-	MP00253	3.08e-06	0.00129	ATGAAAGAGAAAGATATAGACATG
Csa4G075200.1	1322	1345	+	MP00253	3.9e-06	0.00159	aaaagaaaaagaaaaagaaataaa
Csa4G075200.1	1254	1277	-	MP00253	4.28e-06	0.00172	TTATAAGAGAGAAAAGGAGGGAGA
Csa4G075200.1	1388	1411	-	MP00253	4.7e-06	0.00185	GGAAGAAAAAGAGAGTGTGAGAGA
Csa4G075200.1	1384	1407	-	MP00253	5.63e-06	0.00215	GAAAAAGAGAGTGTGAGAGATTTT
Csa4G075200.1	1230	1253	-	MP00253	5.88e-06	0.00222	GGGAGAGAGAGATAGGGGTGAATT
Csa4G075200.1	378	401	-	MP00253	6.96e-06	0.00246	AAAAAAAAAAGAGATGAAGAATGA
Csa4G075200.1	1320	1343	+	MP00253	7.78e-06	0.00261	agaaaagaaaaagaaaaagaaata
Csa4G075200.1	339	362	-	MP00253	8.43e-06	0.00275	ACTAGATGAAGAAAGAGAAATAGA
Csa4G075200.1	1280	1303	-	MP00253	8.65e-06	0.00279	TAGAAGGAAGGAGAGAATGAGGGT
Csa4G075200.1	1284	1307	-	MP00253	1.06e-05	0.00327	TTGATAGAAGGAAGGAGAGAATGA
Csa4G075200.1	1328	1351	+	MP00253	1.25e-05	0.00374	aaaagaaaaagaaataaagggaac
Csa4G075200.1	329	352	-	MP00253	1.41e-05	0.0041	GAAAGAGAAATAGAGAGTGATTAG
Csa4G075200.1	325	348	-	MP00253	1.42e-05	0.0041	GAGAAATAGAGAGTGATTAGAACC
Csa4G075200.1	386	409	-	MP00253	1.59e-05	0.00436	AACAAAAAAAAAAAAAAAGAGATG
Csa4G075200.1	382	405	-	MP00253	1.65e-05	0.00436	AAAAAAAAAAAAAAGAGATGAAGA
Csa4G075200.1	1228	1251	-	MP00253	1.85e-05	0.00467	GAGAGAGAGATAGGGGTGAATTGG
Csa4G075200.1	1198	1221	-	MP00253	2.05e-05	0.00494	GGGTTTTGGAGAGATAGAGAGAGA
Csa4G075200.1	82	105	-	MP00253	2.19e-05	0.00514	GATAAAATGGGTGTGAGAAAGAAA
Csa4G075200.1	1226	1249	-	MP00253	2.31e-05	0.00533	GAGAGAGATAGGGGTGAATTGGGA
Csa4G075200.1	518	541	-	MP00253	2.43e-05	0.00547	GTTAAAAAAACTGAGGTAGAGAGA
Csa4G075200.1	1400	1423	-	MP00253	2.52e-05	0.0056	TAAAGAAACAGAGGAAGAAAAAGA
Csa4G075200.1	293	316	-	MP00253	2.59e-05	0.00568	AGAGAACATAGAGATAGAAAGTGA
Csa4G075200.1	1402	1425	-	MP00253	2.66e-05	0.00578	TTTAAAGAAACAGAGGAAGAAAAA
Csa4G075200.1	376	399	-	MP00253	3.1e-05	0.00637	AAAAAAAAGAGATGAAGAATGATT
Csa4G075200.1	1318	1341	+	MP00253	3.11e-05	0.00637	agagaaaagaaaaagaaaaagaaa
Csa4G075200.1	370	393	-	MP00253	3.14e-05	0.00639	AAGAGATGAAGAATGATTGAAAAC
Csa4G075200.1	756	779	+	MP00253	3.56e-05	0.00689	aagtaaaaaaaaaagaaaagaaaa
Csa4G075200.1	760	783	+	MP00253	3.56e-05	0.00689	aaaaaaaaaagaaaagaaaagaag
Csa4G075200.1	1330	1353	+	MP00253	3.64e-05	0.00702	aagaaaaagaaataaagggaactt
Csa4G075200.1	1172	1195	-	MP00253	3.68e-05	0.00705	GAGAGAGAGAGAGTGGTTTTTCTA
Csa4G075200.1	257	280	-	MP00253	3.82e-05	0.00722	TTATGAAAGAGAAAGATATAGACA
Csa4G075200.1	1453	1476	-	MP00253	3.95e-05	0.00736	GAGAGAAGAAGAAGAAGGAGAATC
Csa4G075200.1	1427	1450	+	MP00253	4.22e-05	0.00765	aagaaaagaaaataaagggagact
Csa4G075200.1	762	785	+	MP00253	4.24e-05	0.00765	aaaaaaaagaaaagaaaagaagaa
Csa4G075200.1	877	900	+	MP00253	4.66e-05	0.00825	gaaaaggaaagaaaagaatggata
Csa4G075200.1	253	276	-	MP00253	5.36e-05	0.00916	GAAAGAGAAAGATATAGACATGAG
Csa4G075200.1	291	314	-	MP00253	5.51e-05	0.00919	AGAACATAGAGATAGAAAGTGATG
Csa4G075200.1	748	771	+	MP00253	5.69e-05	0.00924	aagttataaagtaaaaaaaaaaga
Csa4G075200.1	1313	1336	+	MP00253	5.77e-05	0.00933	cattgagagaaaagaaaaagaaaa
Csa4G075200.1	78	101	-	MP00253	5.88e-05	0.00943	AAATGGGTGTGAGAAAGAAAAATT
Csa4G075200.1	380	403	-	MP00253	6.71e-05	0.0103	AAAAAAAAAAAAGAGATGAAGAAT
Csa4G075200.1	750	773	+	MP00253	6.81e-05	0.0103	gttataaagtaaaaaaaaaagaaa
Csa4G075200.1	388	411	-	MP00253	6.84e-05	0.0103	ATAACAAAAAAAAAAAAAAAGAGA
Csa4G075200.1	758	781	+	MP00253	6.84e-05	0.0103	gtaaaaaaaaaagaaaagaaaaga
Csa4G075200.1	1276	1299	-	MP00253	7.28e-05	0.0107	AGGAAGGAGAGAATGAGGGTATTT
Csa4G075200.1	514	537	-	MP00253	7.42e-05	0.0107	AAAAAACTGAGGTAGAGAGAAACT
Csa4G075200.1	752	775	+	MP00253	8.99e-05	0.0124	tataaagtaaaaaaaaaagaaaag
Csa4G075200.1	384	407	-	MP00253	9.44e-05	0.0129	CAAAAAAAAAAAAAAAGAGATGAA
Csa4G075200.1	1450	1473	-	MP00253	9.44e-05	0.0129	AGAAGAAGAAGAAGGAGAATCAAA
Csa4G075200.1	289	312	-	MP00253	9.61e-05	0.013	AACATAGAGATAGAAAGTGATGAT
Csa4G075200.1	765	788	+	MP00253	9.83e-05	0.013	aaaaagaaaagaaaagaagaaatg
Csa4G075200.1	1183	1203	+	MP00540	1.86e-13	3.54e-09	ctctctctctctctctctctc
Csa4G075200.1	1185	1205	+	MP00540	1.86e-13	3.54e-09	ctctctctctctctctctctc
Csa4G075200.1	1187	1207	+	MP00540	4.13e-13	5.23e-09	ctctctctctctctctctcta
Csa4G075200.1	1181	1201	+	MP00540	1.66e-12	1.58e-08	cactctctctctctctctctc
Csa4G075200.1	1191	1211	+	MP00540	3.16e-12	2.29e-08	ctctctctctctctctatctc
Csa4G075200.1	1193	1213	+	MP00540	3.62e-12	2.29e-08	ctctctctctctctatctctc
Csa4G075200.1	1189	1209	+	MP00540	7.82e-12	4.25e-08	ctctctctctctctctctatc
Csa4G075200.1	1179	1199	+	MP00540	1.16e-10	5.51e-07	accactctctctctctctctc
Csa4G075200.1	1237	1257	+	MP00540	8.89e-10	3.44e-06	ccctatctctctctccctctc
Csa4G075200.1	1195	1215	+	MP00540	3.35e-09	1.06e-05	ctctctctctctatctctcca
Csa4G075200.1	1239	1259	+	MP00540	1.36e-08	2.58e-05	ctatctctctctccctctccc
Csa4G075200.1	1177	1197	+	MP00540	2.78e-08	4.74e-05	aaaccactctctctctctctc
Csa4G075200.1	1241	1261	+	MP00540	4.87e-08	7.41e-05	atctctctctccctctccctc
Csa4G075200.1	1243	1263	+	MP00540	1.4e-07	0.000184	ctctctctccctctccctcct
Csa4G075200.1	334	354	+	MP00540	2.32e-07	0.000295	cactctctatttctctttctt
Csa4G075200.1	1245	1265	+	MP00540	2.53e-07	0.00031	ctctctccctctccctccttt
Csa4G075200.1	1197	1217	+	MP00540	3.6e-07	0.000391	ctctctctctatctctccaaa
Csa4G075200.1	1389	1409	+	MP00540	5.13e-07	0.000528	ctctcacactctctttttctt
Csa4G075200.1	340	360	+	MP00540	6.19e-07	0.000604	ctatttctctttcttcatcta
Csa4G075200.1	1235	1255	+	MP00540	8.63e-07	0.000821	acccctatctctctctccctc
Csa4G075200.1	1395	1415	+	MP00540	1.54e-06	0.00133	cactctctttttcttcctctg
Csa4G075200.1	330	350	+	MP00540	2.06e-06	0.00167	taatcactctctatttctctt
Csa4G075200.1	1175	1195	+	MP00540	2.17e-06	0.00169	aaaaaccactctctctctctc
Csa4G075200.1	1249	1269	+	MP00540	2.18e-06	0.00169	ctccctctccctccttttctc
Csa4G075200.1	1255	1275	+	MP00540	2.88e-06	0.00207	ctccctccttttctctcttat
Csa4G075200.1	332	352	+	MP00540	3.41e-06	0.00226	atcactctctatttctctttc
Csa4G075200.1	1399	1419	+	MP00540	3.44e-06	0.00226	ctctttttcttcctctgtttc
Csa4G075200.1	1281	1301	+	MP00540	3.87e-06	0.0024	ccctcattctctccttccttc
Csa4G075200.1	1324	1344	-	MP00540	4.37e-06	0.00256	TTATTTCTTTTTCTTTTTCTT
Csa4G075200.1	1387	1407	+	MP00540	5.09e-06	0.00289	atctctcacactctctttttc
Csa4G075200.1	1199	1219	+	MP00540	6.5e-06	0.00344	ctctctctatctctccaaaac
Csa4G075200.1	1253	1273	+	MP00540	7.26e-06	0.00378	ctctccctccttttctctctt
Csa4G075200.1	260	280	+	MP00540	7.7e-06	0.00391	ctatatctttctctttcataa
Csa4G075200.1	1233	1253	+	MP00540	7.86e-06	0.00394	tcacccctatctctctctccc
Csa4G075200.1	1393	1413	+	MP00540	8.06e-06	0.00398	cacactctctttttcttcctc
Csa4G075200.1	336	356	+	MP00540	1.03e-05	0.00488	ctctctatttctctttcttca
Csa4G075200.1	1247	1267	+	MP00540	1.15e-05	0.00512	ctctccctctccctccttttc
Csa4G075200.1	77	97	+	MP00540	1.16e-05	0.00512	taatttttctttctcacaccc
Csa4G075200.1	328	348	+	MP00540	1.18e-05	0.00512	tctaatcactctctatttctc
Csa4G075200.1	989	1009	+	MP00540	1.19e-05	0.00512	ttatcactctctcccaccccc
Csa4G075200.1	288	308	+	MP00540	1.21e-05	0.00512	tatcatcactttctatctcta
Csa4G075200.1	1231	1251	+	MP00540	1.21e-05	0.00512	attcacccctatctctctctc
Csa4G075200.1	1330	1350	-	MP00540	1.37e-05	0.00556	TTCCCTTTATTTCTTTTTCTT
Csa4G075200.1	338	358	+	MP00540	1.51e-05	0.00591	ctctatttctctttcttcatc
Csa4G075200.1	294	314	+	MP00540	1.92e-05	0.00701	cactttctatctctatgttct
Csa4G075200.1	1391	1411	+	MP00540	1.99e-05	0.0071	ctcacactctctttttcttcc
Csa4G075200.1	1285	1305	+	MP00540	2e-05	0.0071	cattctctccttccttctatc
Csa4G075200.1	1385	1405	+	MP00540	2e-05	0.0071	aaatctctcacactctctttt
Csa4G075200.1	254	274	+	MP00540	2.42e-05	0.00776	tcatgtctatatctttctctt
Csa4G075200.1	292	312	+	MP00540	2.43e-05	0.00776	atcactttctatctctatgtt
Csa4G075200.1	290	310	+	MP00540	2.73e-05	0.00832	tcatcactttctatctctatg
Csa4G075200.1	1251	1271	+	MP00540	3.03e-05	0.00893	ccctctccctccttttctctc
Csa4G075200.1	1257	1277	+	MP00540	3.74e-05	0.0102	ccctccttttctctcttataa
Csa4G075200.1	1326	1346	-	MP00540	4.13e-05	0.0108	CTTTATTTCTTTTTCTTTTTC
Csa4G075200.1	1403	1423	+	MP00540	4.43e-05	0.0112	ttttcttcctctgtttcttta
Csa4G075200.1	762	782	-	MP00540	4.62e-05	0.0114	TTCTTTTCTTTTCTTTTTTTT
Csa4G075200.1	1383	1403	+	MP00540	4.95e-05	0.0119	aaaaatctctcacactctctt
Csa4G075200.1	426	446	+	MP00540	6.1e-05	0.0136	taatcattctctatctaacga
Csa4G075200.1	1289	1309	+	MP00540	7.44e-05	0.0157	ctctccttccttctatcaaca
Csa4G075200.1	1322	1342	-	MP00540	8.06e-05	0.0167	ATTTCTTTTTCTTTTTCTTTT
Csa4G075200.1	258	278	+	MP00540	8.15e-05	0.0167	gtctatatctttctctttcat
Csa4G075200.1	509	529	+	MP00540	8.7e-05	0.0171	tctctagtttctctctacctc
Csa4G075200.1	377	397	+	MP00540	9.42e-05	0.0178	atcattcttcatctctttttt
Csa4G075200.1	760	779	+	MP00611	1.69e-07	0.000966	aaaaaaaaaagaaaagaaaa
Csa4G075200.1	765	784	+	MP00611	5.47e-07	0.00143	aaaaagaaaagaaaagaaga
Csa4G075200.1	1184	1203	-	MP00611	7.01e-07	0.00143	GAGAGAGAGAGAGAGAGAGA
Csa4G075200.1	1186	1205	-	MP00611	7.01e-07	0.00143	GAGAGAGAGAGAGAGAGAGA
Csa4G075200.1	1324	1343	+	MP00611	7.21e-07	0.00143	aagaaaaagaaaaagaaata
Csa4G075200.1	1322	1341	+	MP00611	1.23e-06	0.00185	aaaagaaaaagaaaaagaaa
Csa4G075200.1	390	409	-	MP00611	1.82e-06	0.00185	AACAAAAAAAAAAAAAAAGA
Csa4G075200.1	1192	1211	-	MP00611	1.98e-06	0.00185	GAGATAGAGAGAGAGAGAGA
Csa4G075200.1	1182	1201	-	MP00611	2.09e-06	0.00185	GAGAGAGAGAGAGAGAGAGT
Csa4G075200.1	1402	1421	-	MP00611	2.27e-06	0.00185	AAGAAACAGAGGAAGAAAAA
Csa4G075200.1	1424	1443	+	MP00611	2.63e-06	0.002	aacaagaaaagaaaataaag
Csa4G075200.1	1188	1207	-	MP00611	2.97e-06	0.00212	TAGAGAGAGAGAGAGAGAGA
Csa4G075200.1	762	781	+	MP00611	3.63e-06	0.00237	aaaaaaaagaaaagaaaaga
Csa4G075200.1	388	407	-	MP00611	3.76e-06	0.00242	CAAAAAAAAAAAAAAAGAGA
Csa4G075200.1	1238	1257	-	MP00611	3.89e-06	0.00247	GAGAGGGAGAGAGAGATAGG
Csa4G075200.1	1396	1415	-	MP00611	5.07e-06	0.00301	CAGAGGAAGAAAAAGAGAGT
Csa4G075200.1	846	865	+	MP00611	5.49e-06	0.0031	caagagaagagaagagaaga
Csa4G075200.1	1180	1199	-	MP00611	7.03e-06	0.00361	GAGAGAGAGAGAGAGAGTGG
Csa4G075200.1	849	868	+	MP00611	8.84e-06	0.00416	gagaagagaagagaagagga
Csa4G075200.1	877	896	+	MP00611	9.95e-06	0.00455	gaaaaggaaagaaaagaatg
Csa4G075200.1	1398	1417	-	MP00611	1.05e-05	0.00457	AACAGAGGAAGAAAAAGAGA
Csa4G075200.1	1455	1474	-	MP00611	1.15e-05	0.00467	GAGAAGAAGAAGAAGGAGAA
Csa4G075200.1	387	406	-	MP00611	1.32e-05	0.00518	AAAAAAAAAAAAAAAGAGAT
Csa4G075200.1	851	870	+	MP00611	1.32e-05	0.00518	gaagagaagagaagaggaag
Csa4G075200.1	1318	1337	+	MP00611	1.34e-05	0.00518	agagaaaagaaaaagaaaaa
Csa4G075200.1	756	775	+	MP00611	1.44e-05	0.00534	aagtaaaaaaaaaagaaaag
Csa4G075200.1	1250	1269	-	MP00611	2.01e-05	0.00642	GAGAAAAGGAGGGAGAGGGA
Csa4G075200.1	1390	1409	-	MP00611	2.05e-05	0.00646	AAGAAAAAGAGAGTGTGAGA
Csa4G075200.1	1190	1209	-	MP00611	2.15e-05	0.00661	GATAGAGAGAGAGAGAGAGA
Csa4G075200.1	1328	1347	+	MP00611	2.62e-05	0.00761	aaaagaaaaagaaataaagg
Csa4G075200.1	382	401	-	MP00611	2.83e-05	0.00795	AAAAAAAAAAGAGATGAAGA
Csa4G075200.1	767	786	+	MP00611	2.89e-05	0.00795	aaagaaaagaaaagaagaaa
Csa4G075200.1	768	787	+	MP00611	3.06e-05	0.00795	aagaaaagaaaagaagaaat
Csa4G075200.1	1429	1448	+	MP00611	3.37e-05	0.00846	gaaaagaaaataaagggaga
Csa4G075200.1	1326	1345	+	MP00611	3.67e-05	0.009	gaaaaagaaaaagaaataaa
Csa4G075200.1	773	792	+	MP00611	3.77e-05	0.00912	aagaaaagaagaaatgtaat
Csa4G075200.1	1319	1338	+	MP00611	4.3e-05	0.00977	gagaaaagaaaaagaaaaag
Csa4G075200.1	337	356	-	MP00611	4.34e-05	0.00977	TGAAGAAAGAGAAATAGAGA
Csa4G075200.1	1330	1349	+	MP00611	4.5e-05	0.00999	aagaaaaagaaataaaggga
Csa4G075200.1	1194	1213	-	MP00611	4.8e-05	0.0103	GAGAGATAGAGAGAGAGAGA
Csa4G075200.1	510	529	-	MP00611	4.94e-05	0.0104	GAGGTAGAGAGAAACTAGAG
Csa4G075200.1	386	405	-	MP00611	5.12e-05	0.0105	AAAAAAAAAAAAAAGAGATG
Csa4G075200.1	1457	1476	-	MP00611	5.26e-05	0.0107	GAGAGAAGAAGAAGAAGGAG
Csa4G075200.1	1178	1197	-	MP00611	5.41e-05	0.0107	GAGAGAGAGAGAGAGTGGTT
Csa4G075200.1	1282	1301	-	MP00611	5.56e-05	0.011	GAAGGAAGGAGAGAATGAGG
Csa4G075200.1	755	774	+	MP00611	5.81e-05	0.0113	aaagtaaaaaaaaaagaaaa
Csa4G075200.1	1258	1277	-	MP00611	5.86e-05	0.0113	TTATAAGAGAGAAAAGGAGG
Csa4G075200.1	1240	1259	-	MP00611	6.13e-05	0.0116	GGGAGAGGGAGAGAGAGATA
Csa4G075200.1	1316	1335	+	MP00611	6.36e-05	0.0118	tgagagaaaagaaaaagaaa
Csa4G075200.1	1320	1339	+	MP00611	6.47e-05	0.0118	agaaaagaaaaagaaaaaga
Csa4G075200.1	1244	1263	-	MP00611	8.06e-05	0.0134	AGGAGGGAGAGGGAGAGAGA
Csa4G075200.1	384	403	-	MP00611	8.2e-05	0.0135	AAAAAAAAAAAAGAGATGAA
Csa4G075200.1	770	789	+	MP00611	8.35e-05	0.0136	gaaaagaaaagaagaaatgt
Csa4G075200.1	1311	1330	+	MP00611	8.35e-05	0.0136	tgcattgagagaaaagaaaa
Csa4G075200.1	389	408	-	MP00611	8.87e-05	0.0142	ACAAAAAAAAAAAAAAAGAG
Csa4G075200.1	763	782	+	MP00611	9.02e-05	0.0142	aaaaaaagaaaagaaaagaa
Csa4G075200.1	1332	1351	+	MP00611	9.02e-05	0.0142	gaaaaagaaataaagggaac
Csa4G075200.1	393	412	-	MP00611	9.34e-05	0.0145	GATAACAAAAAAAAAAAAAA
Csa4G075200.1	385	404	-	MP00611	9.58e-05	0.0146	AAAAAAAAAAAAAGAGATGA
Csa5G052540.1	1052	1075	+	MP00253	3.28e-05	0.0066	aataaacaatcaaagaaaaagaga
Csa5G052540.1	32	55	-	MP00253	6.3e-05	0.00982	ATGAGGGCGAGACAAAATAATAGA
Csa5G052540.1	706	729	-	MP00253	7.15e-05	0.0106	GGTAGAGAAAGCTATAGTTAGAAT
Csa5G052540.1	675	698	-	MP00253	7.38e-05	0.0107	GGTAGAGATAGCTAAAGTTAGTTA
Csa5G052540.1	1296	1319	+	MP00253	9.57e-05	0.013	agaaaatggaatgagagagaatca
Csa5G052540.1	713	733	+	MP00540	2.54e-05	0.00787	ctatagctttctctaccctta
Csa5G052540.1	1304	1324	-	MP00540	5.79e-05	0.0132	CATATTGATTCTCTCTCATTC
Csa5G052540.1	682	702	+	MP00540	9.23e-05	0.0176	ctttagctatctctaccctta
Csa5G052540.1	1365	1384	-	MP00611	1.71e-06	0.00185	CAAAAGAGGACAGAAGAGGA
Csa5G052540.1	34	53	-	MP00611	1.08e-05	0.00459	GAGGGCGAGACAAAATAATA
Csa5G052540.1	1375	1394	-	MP00611	1.61e-05	0.0057	TGGAAGCAAACAAAAGAGGA
Csa5G052540.1	1064	1083	+	MP00611	5.66e-05	0.0111	aagaaaaagagaacattcta
Csa5G052540.1	4	23	-	MP00611	5.81e-05	0.0113	AGCAAGAAGAGAAGAACACC
Csa5G052540.1	1056	1075	+	MP00611	5.86e-05	0.0113	aacaatcaaagaaaaagaga
Csa5G172270.1	372	395	+	MP00253	2.37e-06	0.00108	GGGGGAAAGAGAGGGAGAGCAGCC
Csa5G172270.1	370	393	+	MP00253	3.08e-06	0.00129	TTGGGGGAAAGAGAGGGAGAGCAG
Csa5G172270.1	368	391	+	MP00253	5.13e-06	0.002	ATTTGGGGGAAAGAGAGGGAGAGC
Csa5G172270.1	1463	1486	-	MP00253	5.36e-06	0.00207	GAGAAAAAGAAATTAGAAAAGAGG
Csa5G172270.1	1099	1122	+	MP00253	6.96e-06	0.00246	AAGAGAGGGTAAAAGAAAATAATA
Csa5G172270.1	1467	1490	-	MP00253	1.14e-05	0.00346	TAGAGAGAAAAAGAAATTAGAAAA
Csa5G172270.1	1111	1134	+	MP00253	2.65e-05	0.00578	AAGAAAATAATAATAAAAGAGAGA
Csa5G172270.1	1091	1114	+	MP00253	2.85e-05	0.00595	AGTAAAACAAGAGAGGGTAAAAGA
Csa5G172270.1	1469	1492	-	MP00253	5.59e-05	0.00919	ATTAGAGAGAAAAAGAAATTAGAA
Csa5G172270.1	1445	1468	-	MP00253	6.87e-05	0.0103	AAGAGGGTGACAAAAGAAAAGCCA
Csa5G172270.1	1465	1488	-	MP00253	7.62e-05	0.0109	GAGAGAAAAAGAAATTAGAAAAGA
Csa5G172270.1	1101	1124	+	MP00253	7.97e-05	0.0113	GAGAGGGTAAAAGAAAATAATAAT
Csa5G172270.1	1472	1492	+	MP00540	1.19e-05	0.00512	TAATTTCTTTTTCTCTCTAAT
Csa5G172270.1	372	392	-	MP00540	1.36e-05	0.00556	TGCTCTCCCTCTCTTTCCCCC
Csa5G172270.1	1474	1494	+	MP00540	1.81e-05	0.00677	ATTTCTTTTTCTCTCTAATAA
Csa5G172270.1	370	390	-	MP00540	2.21e-05	0.00749	CTCTCCCTCTCTTTCCCCCAA
Csa5G172270.1	374	394	-	MP00540	3.65e-05	0.0101	GCTGCTCTCCCTCTCTTTCCC
Csa5G172270.1	1470	1490	+	MP00540	4.2e-05	0.0109	TCTAATTTCTTTTTCTCTCTA
Csa5G172270.1	1099	1119	-	MP00540	4.36e-05	0.0111	TATTTTCTTTTACCCTCTCTT
Csa5G172270.1	368	388	-	MP00540	4.54e-05	0.0114	CTCCCTCTCTTTCCCCCAAAT
Csa5G172270.1	1476	1496	+	MP00540	4.85e-05	0.0117	TTCTTTTTCTCTCTAATAACC
Csa5G172270.1	1449	1468	-	MP00611	6.55e-07	0.00143	AAGAGGGTGACAAAAGAAAA
Csa5G172270.1	1469	1488	-	MP00611	2.75e-05	0.00782	GAGAGAAAAAGAAATTAGAA
Csa5G172270.1	591	610	+	MP00611	6.19e-05	0.0116	GAAAGAATGACAAAGTTATT
Csa5G172270.1	1262	1281	+	MP00611	7.99e-05	0.0134	CAAACAAAAATAAAATAAAA
Csa5G172270.1	374	393	+	MP00611	8.35e-05	0.0136	GGGAAAGAGAGGGAGAGCAG
Csa6G075200.1	1184	1207	+	MP00253	1e-06	0.000586	aagagagaaataataagaaagagt
Csa6G075200.1	1178	1201	+	MP00253	2.15e-06	0.00103	aatggaaagagagaaataataaga
Csa6G075200.1	1180	1203	+	MP00253	2.16e-06	0.00103	tggaaagagagaaataataagaaa
Csa6G075200.1	1186	1209	+	MP00253	6.35e-06	0.00235	gagagaaataataagaaagagtat
Csa6G075200.1	1409	1432	-	MP00253	6.49e-06	0.00238	GGGAAAATGAGAGAAGGGAAGTGG
Csa6G075200.1	1168	1191	+	MP00253	6.66e-06	0.00242	agtaaaaaaaaatggaaagagaga
Csa6G075200.1	1172	1195	+	MP00253	8.47e-06	0.00275	aaaaaaaatggaaagagagaaata
Csa6G075200.1	1382	1405	-	MP00253	1.05e-05	0.00327	ATTTAAAAGAGAAAAAGAGAAAAG
Csa6G075200.1	1182	1205	+	MP00253	1.64e-05	0.00436	gaaagagagaaataataagaaaga
Csa6G075200.1	1273	1296	+	MP00253	1.64e-05	0.00436	ttgaaagataaataggaaaagaaa
Csa6G075200.1	1378	1401	-	MP00253	1.85e-05	0.00467	AAAAGAGAAAAAGAGAAAAGCCAA
Csa6G075200.1	1188	1211	+	MP00253	2.04e-05	0.00494	gagaaataataagaaagagtataa
Csa6G075200.1	1174	1197	+	MP00253	2.22e-05	0.00516	aaaaaatggaaagagagaaataat
Csa6G075200.1	1176	1199	+	MP00253	2.82e-05	0.00595	aaaatggaaagagagaaataataa
Csa6G075200.1	1388	1411	-	MP00253	2.86e-05	0.00595	TGGAGAATTTAAAAGAGAAAAAGA
Csa6G075200.1	1374	1397	-	MP00253	3.07e-05	0.00634	GAGAAAAAGAGAAAAGCCAAAAGA
Csa6G075200.1	729	752	+	MP00253	3.31e-05	0.0066	aatacagaaagaaaaacaaaacgg
Csa6G075200.1	1376	1399	-	MP00253	3.54e-05	0.00689	AAGAGAAAAAGAGAAAAGCCAAAA
Csa6G075200.1	1386	1409	-	MP00253	3.82e-05	0.00722	GAGAATTTAAAAGAGAAAAAGAGA
Csa6G075200.1	165	188	+	MP00253	4.7e-05	0.00829	tagaaaaaaaggaaaggaaagcaa
Csa6G075200.1	1275	1298	+	MP00253	4.75e-05	0.00833	gaaagataaataggaaaagaaaat
Csa6G075200.1	1472	1495	+	MP00253	5.51e-05	0.00919	gattaaaaaaaaaaaaaaaaaaaa
Csa6G075200.1	1380	1403	-	MP00253	5.61e-05	0.00919	TTAAAAGAGAAAAAGAGAAAAGCC
Csa6G075200.1	951	974	+	MP00253	6.02e-05	0.00961	aaaagaaaaataaaaagaaaagta
Csa6G075200.1	1170	1193	+	MP00253	6.04e-05	0.00961	taaaaaaaaatggaaagagagaaa
Csa6G075200.1	1411	1434	-	MP00253	6.1e-05	0.00962	ATGGGAAAATGAGAGAAGGGAAGT
Csa6G075200.1	1166	1189	+	MP00253	6.81e-05	0.0103	aaagtaaaaaaaaatggaaagaga
Csa6G075200.1	1271	1294	+	MP00253	7.15e-05	0.0106	cattgaaagataaataggaaaaga
Csa6G075200.1	947	970	+	MP00253	8.56e-05	0.0121	atttaaaagaaaaataaaaagaaa
Csa6G075200.1	953	976	+	MP00253	8.64e-05	0.0121	aagaaaaataaaaagaaaagtaag
Csa6G075200.1	1265	1288	+	MP00253	8.64e-05	0.0121	cacagacattgaaagataaatagg
Csa6G075200.1	1279	1302	+	MP00253	9.74e-05	0.013	gataaataggaaaagaaaatagga
Csa6G075200.1	1182	1202	-	MP00540	1.35e-06	0.00123	TTCTTATTATTTCTCTCTTTC
Csa6G075200.1	1383	1403	+	MP00540	9.21e-06	0.00444	ttttctctttttctcttttaa
Csa6G075200.1	1186	1206	-	MP00540	1.37e-05	0.00556	CTCTTTCTTATTATTTCTCTC
Csa6G075200.1	1178	1198	-	MP00540	1.71e-05	0.00644	TATTATTTCTCTCTTTCCATT
Csa6G075200.1	727	747	-	MP00540	2.1e-05	0.00732	TTGTTTTTCTTTCTGTATTTC
Csa6G075200.1	1174	1194	-	MP00540	2.12e-05	0.00734	ATTTCTCTCTTTCCATTTTTT
Csa6G075200.1	1410	1430	+	MP00540	2.27e-05	0.00762	cacttcccttctctcattttc
Csa6G075200.1	1074	1094	-	MP00540	3.29e-05	0.00959	AACTGTTTCTTTATATATATA
Csa6G075200.1	1408	1428	+	MP00540	3.91e-05	0.0105	tccacttcccttctctcattt
Csa6G075200.1	1176	1196	-	MP00540	4.56e-05	0.0114	TTATTTCTCTCTTTCCATTTT
Csa6G075200.1	1385	1405	+	MP00540	5.5e-05	0.0127	ttctctttttctcttttaaat
Csa6G075200.1	1072	1092	-	MP00540	6.62e-05	0.0147	CTGTTTCTTTATATATATATA
Csa6G075200.1	1381	1401	+	MP00540	7.08e-05	0.0154	gcttttctctttttctctttt
Csa6G075200.1	1275	1295	-	MP00540	8.41e-05	0.0169	TTCTTTTCCTATTTATCTTTC
Csa6G075200.1	1387	1407	+	MP00540	8.43e-05	0.0169	ctctttttctcttttaaattc
Csa6G075200.1	1188	1208	-	MP00540	8.52e-05	0.017	TACTCTTTCTTATTATTTCTC
Csa6G075200.1	1375	1395	+	MP00540	8.79e-05	0.0171	cttttggcttttctctttttc
Csa6G075200.1	1377	1397	+	MP00540	9.29e-05	0.0177	tttggcttttctctttttctc
Csa6G075200.1	1277	1297	-	MP00540	9.88e-05	0.0185	TTTTCTTTTCCTATTTATCTT
Csa6G075200.1	1378	1397	-	MP00611	1.31e-08	0.0006	GAGAAAAAGAGAAAAGCCAA
Csa6G075200.1	1476	1495	+	MP00611	2.39e-06	0.00185	aaaaaaaaaaaaaaaaaaaa
Csa6G075200.1	1477	1496	+	MP00611	2.39e-06	0.00185	aaaaaaaaaaaaaaaaaaaa
Csa6G075200.1	1478	1497	+	MP00611	2.39e-06	0.00185	aaaaaaaaaaaaaaaaaaaa
Csa6G075200.1	1479	1498	+	MP00611	2.39e-06	0.00185	aaaaaaaaaaaaaaaaaaaa
Csa6G075200.1	165	184	+	MP00611	4.9e-06	0.00299	tagaaaaaaaggaaaggaaa
Csa6G075200.1	957	976	+	MP00611	5.43e-06	0.0031	aaaataaaaagaaaagtaag
Csa6G075200.1	1371	1390	-	MP00611	7.34e-06	0.00369	AGAGAAAAGCCAAAAGAAGG
Csa6G075200.1	292	311	-	MP00611	7.84e-06	0.00381	AAGAAACAGAAAAGAGAAAA
Csa6G075200.1	1475	1494	+	MP00611	8.1e-06	0.00386	taaaaaaaaaaaaaaaaaaa
Csa6G075200.1	1413	1432	-	MP00611	9.43e-06	0.0044	GGGAAAATGAGAGAAGGGAA
Csa6G075200.1	1480	1499	+	MP00611	9.95e-06	0.00455	aaaaaaaaaaaaaaaaaaac
Csa6G075200.1	735	754	+	MP00611	1.41e-05	0.00527	gaaagaaaaacaaaacggta
Csa6G075200.1	953	972	+	MP00611	1.5e-05	0.00543	aagaaaaataaaaagaaaag
Csa6G075200.1	951	970	+	MP00611	2.09e-05	0.00655	aaaagaaaaataaaaagaaa
Csa6G075200.1	170	189	+	MP00611	2.18e-05	0.00661	aaaaaggaaaggaaagcaaa
Csa6G075200.1	296	315	-	MP00611	2.52e-05	0.00744	AATAAAGAAACAGAAAAGAG
Csa6G075200.1	1380	1399	-	MP00611	3.03e-05	0.00795	AAGAGAAAAAGAGAAAAGCC
Csa6G075200.1	1481	1500	+	MP00611	3.18e-05	0.00817	aaaaaaaaaaaaaaaaaacc
Csa6G075200.1	1180	1199	+	MP00611	3.21e-05	0.0082	tggaaagagagaaataataa
Csa6G075200.1	729	748	+	MP00611	3.92e-05	0.00923	aatacagaaagaaaaacaaa
Csa6G075200.1	1386	1405	-	MP00611	4.67e-05	0.0102	ATTTAAAAGAGAAAAAGAGA
Csa6G075200.1	1277	1296	+	MP00611	5.97e-05	0.0115	aagataaataggaaaagaaa
Csa6G075200.1	1283	1302	+	MP00611	6.59e-05	0.0119	aataggaaaagaaaatagga
Csa6G075200.1	1178	1197	+	MP00611	6.65e-05	0.012	aatggaaagagagaaataat
Csa6G075200.1	731	750	+	MP00611	7.2e-05	0.0126	tacagaaagaaaaacaaaac
Csa6G075200.1	1411	1430	-	MP00611	7.45e-05	0.0129	GAAAATGAGAGAAGGGAAGT
Csa6G075200.1	1472	1491	+	MP00611	7.99e-05	0.0134	gattaaaaaaaaaaaaaaaa
Csa6G075200.1	384	403	-	MP00611	9.18e-05	0.0143	AAAAGAAAAAGGAAATTAAT
Csa6G075200.1	1384	1403	-	MP00611	9.91e-05	0.015	TTAAAAGAGAAAAAGAGAAA
Csa6G351370.1	123	142	-	MP00611	1.48e-05	0.00542	AAGGAACAGACAAGAGATAG
Csa6G476070.1	1471	1494	+	MP00253	8.84e-05	0.0123	aggaaaaagaaaataaaaagaata
Csa6G476070.1	1029	1048	-	MP00611	8.1e-06	0.00386	AGTGAGAAGACAAAAAAAAG
Csa6G476070.1	1469	1488	+	MP00611	1.09e-05	0.00459	aaaggaaaaagaaaataaaa
Csa6G476070.1	1471	1490	+	MP00611	2.15e-05	0.00661	aggaaaaagaaaataaaaag
Csa6G476070.1	257	276	-	MP00611	3.57e-05	0.00886	AACAAAAAAAAAAAAAGATT
Csa6G476070.1	255	274	-	MP00611	4.42e-05	0.00991	CAAAAAAAAAAAAAGATTGA
Csa6G476070.1	1474	1493	+	MP00611	4.59e-05	0.0101	aaaaagaaaataaaaagaat
Csa6G476070.1	1462	1481	+	MP00611	4.63e-05	0.0101	caaataaaaaggaaaaagaa
Csa6G476070.1	1026	1045	-	MP00611	4.72e-05	0.0102	GAGAAGACAAAAAAAAGGAT
Csa6G476070.1	259	278	-	MP00611	5.07e-05	0.0105	TAAACAAAAAAAAAAAAAGA
Csa6G476070.1	441	460	+	MP00611	6.03e-05	0.0115	gaaaaaaggccacaaggaag
Csa6G476070.1	1480	1499	+	MP00611	6.83e-05	0.0121	aaaataaaaagaataaaaga
Csa6G476070.1	1169	1188	+	MP00611	8.42e-05	0.0136	gagaaggtaacaaacacaac
Csa6G523390.1	264	287	-	MP00253	4.21e-06	0.00171	ATGAAATAAAAAAAGAGAAAAAAA
Csa6G523390.1	262	285	-	MP00253	2.18e-05	0.00514	GAAATAAAAAAAGAGAAAAAAACG
Csa6G523390.1	296	319	-	MP00253	2.49e-05	0.00555	AATTAATTTAAAGAGAGAGAGATT
Csa6G523390.1	292	315	-	MP00253	2.7e-05	0.0058	AATTTAAAGAGAGAGAGATTAGAA
Csa6G523390.1	290	313	-	MP00253	3.41e-05	0.00673	TTTAAAGAGAGAGAGATTAGAATT
Csa6G523390.1	260	283	-	MP00253	4.38e-05	0.00787	AATAAAAAAAGAGAAAAAAACGCG
Csa6G523390.1	1118	1141	+	MP00253	7.38e-05	0.0107	aagaaaaagaaaattgaggaaata
Csa6G523390.1	295	315	+	MP00540	4.04e-06	0.0024	taatctctctctctttaaatt
Csa6G523390.1	293	313	+	MP00540	2.17e-05	0.00744	tctaatctctctctctttaaa
Csa6G523390.1	1433	1453	+	MP00540	3.45e-05	0.00988	aaattcctctcactatatatc
Csa6G523390.1	291	311	+	MP00540	3.69e-05	0.0101	attctaatctctctctcttta
Csa6G523390.1	289	309	+	MP00540	3.99e-05	0.0106	taattctaatctctctctctt
Csa6G523390.1	261	281	+	MP00540	5.1e-05	0.0121	gcgtttttttctcttttttta
Csa6G523390.1	265	285	+	MP00540	5.91e-05	0.0134	ttttttctctttttttatttc
Csa6G523390.1	297	317	+	MP00540	7.18e-05	0.0155	atctctctctctttaaattaa
Csa6G523390.1	1108	1128	-	MP00540	8.64e-05	0.0171	TTCTTTTTCTTAATTTAACTT
Csa6G523390.1	262	281	-	MP00611	5.63e-07	0.00143	TAAAAAAAGAGAAAAAAACG
Csa6G523390.1	264	283	-	MP00611	1.02e-05	0.00456	AATAAAAAAAGAGAAAAAAA
Csa6G523390.1	260	279	-	MP00611	1.03e-05	0.00456	AAAAAAGAGAAAAAAACGCG
Csa6G523390.1	1409	1428	-	MP00611	4.03e-05	0.0093	GAGAAAAGAAGGAAGAACAA
Csa6G523390.1	1402	1421	-	MP00611	4.46e-05	0.00995	GAAGGAAGAACAAAAAATGG
Csa7G413380.1	1311	1334	-	MP00253	1.62e-08	2.45e-05	GAGAGAGAGAGGGGAGAAAAGAGA
Csa7G413380.1	1313	1336	-	MP00253	4.3e-07	0.000319	ACGAGAGAGAGAGGGGAGAAAAGA
Csa7G413380.1	1309	1332	-	MP00253	7.55e-07	0.000503	GAGAGAGAGGGGAGAAAAGAGAGT
Csa7G413380.1	1307	1330	-	MP00253	1.41e-05	0.0041	GAGAGAGGGGAGAAAAGAGAGTTG
Csa7G413380.1	1314	1334	+	MP00540	1.89e-06	0.0016	cttttctcccctctctctctc
Csa7G413380.1	1312	1332	+	MP00540	1.25e-05	0.00521	ctcttttctcccctctctctc
Csa7G413380.1	1316	1336	+	MP00540	1.45e-05	0.00576	tttctcccctctctctctcgt
Csa7G413380.1	1310	1330	+	MP00540	3.37e-05	0.0097	ctctcttttctcccctctctc
Csa7G413380.1	478	497	+	MP00611	3.22e-06	0.00223	ccaaaaaaaacaaaaacaag
Csa7G413380.1	1197	1216	+	MP00611	4.79e-06	0.00296	tagaaaaagaaaaaaactat
Csa7G413380.1	1446	1465	+	MP00611	6.01e-06	0.00323	caaaaaagaagaaaaaaaac
Csa7G413380.1	126	145	-	MP00611	2.62e-05	0.00761	TGGAAAAAAAAAAAAAAACA
Csa7G413380.1	1315	1334	-	MP00611	3.03e-05	0.00795	GAGAGAGAGAGGGGAGAAAA
Csa7G413380.1	124	143	-	MP00611	3.06e-05	0.00795	GAAAAAAAAAAAAAAACATT
Csa7G413380.1	1448	1467	+	MP00611	3.37e-05	0.00846	aaaaagaagaaaaaaaacct
Csa7G413380.1	1445	1464	+	MP00611	4.76e-05	0.0103	ccaaaaaagaagaaaaaaaa
Csa7G413380.1	1310	1329	-	MP00611	5.12e-05	0.0105	AGAGAGGGGAGAAAAGAGAG
Csa7G413380.1	125	144	-	MP00611	7.92e-05	0.0134	GGAAAAAAAAAAAAAAACAT
Csa7G413380.1	479	498	+	MP00611	8.42e-05	0.0136	caaaaaaaacaaaaacaaga
Csa7G434970.1	168	191	-	MP00253	1.01e-10	4.97e-07	GATAGAGATAGAGAGATAGAGAGA
Csa7G434970.1	160	183	-	MP00253	1.56e-10	6.83e-07	TAGAGAGATAGAGAGATAGAGAGA
Csa7G434970.1	164	187	-	MP00253	4.61e-10	1.65e-06	GAGATAGAGAGATAGAGAGATAGA
Csa7G434970.1	166	189	-	MP00253	1.12e-09	3.68e-06	TAGAGATAGAGAGATAGAGAGATA
Csa7G434970.1	626	649	+	MP00253	1.42e-09	4.3e-06	gagaggaagagaggaagagtgaga
Csa7G434970.1	162	185	-	MP00253	1.78e-09	4.98e-06	GATAGAGAGATAGAGAGATAGAGA
Csa7G434970.1	624	647	+	MP00253	3.68e-09	8.51e-06	aagagaggaagagaggaagagtga
Csa7G434970.1	172	195	-	MP00253	4.16e-09	9e-06	GATAGATAGAGATAGAGAGATAGA
Csa7G434970.1	176	199	-	MP00253	1.08e-08	1.77e-05	GATAGATAGATAGAGATAGAGAGA
Csa7G434970.1	174	197	-	MP00253	1.81e-08	2.62e-05	TAGATAGATAGAGATAGAGAGATA
Csa7G434970.1	182	205	-	MP00253	2.06e-08	2.79e-05	GAGATAGATAGATAGATAGAGATA
Csa7G434970.1	632	655	+	MP00253	2.52e-08	3.19e-05	aagagaggaagagtgagagggggg
Csa7G434970.1	170	193	-	MP00253	3.63e-08	4.32e-05	TAGATAGAGATAGAGAGATAGAGA
Csa7G434970.1	628	651	+	MP00253	5.35e-08	6e-05	gaggaagagaggaagagtgagagg
Csa7G434970.1	178	201	-	MP00253	7.99e-08	8.26e-05	TAGATAGATAGATAGAGATAGAGA
Csa7G434970.1	184	207	-	MP00253	1.68e-07	0.00015	GGGAGATAGATAGATAGATAGAGA
Csa7G434970.1	180	203	-	MP00253	1.93e-07	0.000165	GATAGATAGATAGATAGAGATAGA
Csa7G434970.1	634	657	+	MP00253	2.3e-07	0.000188	gagaggaagagtgagagggggggg
Csa7G434970.1	620	643	+	MP00253	2.71e-07	0.000213	taggaagagaggaagagaggaaga
Csa7G434970.1	906	929	+	MP00253	3.29e-07	0.000253	gaataagagagaggtatagggaga
Csa7G434970.1	30	53	+	MP00253	7.46e-07	0.000503	aaggaaaagagagagagaggatac
Csa7G434970.1	636	659	+	MP00253	8.54e-07	0.00055	gaggaagagtgagaggggggggta
Csa7G434970.1	186	209	-	MP00253	8.97e-07	0.000563	AGGGGAGATAGATAGATAGATAGA
Csa7G434970.1	26	49	+	MP00253	1.51e-06	0.000802	taagaaggaaaagagagagagagg
Csa7G434970.1	618	641	+	MP00253	1.58e-06	0.00083	tttaggaagagaggaagagaggaa
Csa7G434970.1	898	921	+	MP00253	1.63e-06	0.000843	aagaagaagaataagagagaggta
Csa7G434970.1	896	919	+	MP00253	1.72e-06	0.000878	aaaagaagaagaataagagagagg
Csa7G434970.1	28	51	+	MP00253	1.94e-06	0.000955	agaaggaaaagagagagagaggat
Csa7G434970.1	622	645	+	MP00253	2.26e-06	0.00107	ggaagagaggaagagaggaagagt
Csa7G434970.1	98	121	+	MP00253	2.29e-06	0.00107	aagacagagacaaagacaaaaaaa
Csa7G434970.1	24	47	+	MP00253	2.48e-06	0.00109	tataagaaggaaaagagagagaga
Csa7G434970.1	912	935	+	MP00253	2.84e-06	0.00121	gagagaggtatagggagaagaggg
Csa7G434970.1	102	125	+	MP00253	6.31e-06	0.00235	cagagacaaagacaaaaaaacaaa
Csa7G434970.1	34	57	+	MP00253	7.3e-06	0.00254	aaaagagagagagaggatacaaag
Csa7G434970.1	32	55	+	MP00253	7.62e-06	0.0026	ggaaaagagagagagaggatacaa
Csa7G434970.1	616	639	+	MP00253	8.29e-06	0.00275	attttaggaagagaggaagagagg
Csa7G434970.1	910	933	+	MP00253	1.29e-05	0.00383	aagagagaggtatagggagaagag
Csa7G434970.1	22	45	+	MP00253	1.87e-05	0.00469	agtataagaaggaaaagagagaga
Csa7G434970.1	1027	1050	-	MP00253	1.96e-05	0.00487	AATGGAAGGAGACAAGAAAAGAAA
Csa7G434970.1	904	927	+	MP00253	2.22e-05	0.00516	aagaataagagagaggtataggga
Csa7G434970.1	900	923	+	MP00253	2.43e-05	0.00547	gaagaagaataagagagaggtata
Csa7G434970.1	104	127	+	MP00253	3.17e-05	0.00642	gagacaaagacaaaaaaacaaaaa
Csa7G434970.1	908	931	+	MP00253	3.31e-05	0.0066	ataagagagaggtatagggagaag
Csa7G434970.1	1025	1048	-	MP00253	3.34e-05	0.00663	TGGAAGGAGACAAGAAAAGAAAGG
Csa7G434970.1	638	661	+	MP00253	4.01e-05	0.00739	ggaagagtgagaggggggggtatg
Csa7G434970.1	1014	1037	-	MP00253	4.01e-05	0.00739	AAGAAAAGAAAGGGGAGTGAGTGT
Csa7G434970.1	630	653	+	MP00253	4.09e-05	0.0075	ggaagagaggaagagtgagagggg
Csa7G434970.1	190	213	-	MP00253	5.19e-05	0.00898	TTTGAGGGGAGATAGATAGATAGA
Csa7G434970.1	96	119	+	MP00253	5.26e-05	0.00907	acaagacagagacaaagacaaaaa
Csa7G434970.1	391	414	-	MP00253	6.21e-05	0.00972	CACACAAAAAGAAAAAATGAAAAA
Csa7G434970.1	188	211	-	MP00253	9.49e-05	0.0129	TGAGGGGAGATAGATAGATAGATA
Csa7G434970.1	163	183	+	MP00540	9.05e-10	3.44e-06	ctctatctctctatctctcta
Csa7G434970.1	167	187	+	MP00540	3.32e-09	1.06e-05	atctctctatctctctatctc
Csa7G434970.1	171	191	+	MP00540	6.16e-09	1.67e-05	ctctatctctctatctctatc
Csa7G434970.1	165	185	+	MP00540	9.69e-09	2.46e-05	ctatctctctatctctctatc
Csa7G434970.1	161	181	+	MP00540	1.1e-08	2.56e-05	ctctctatctctctatctctc
Csa7G434970.1	173	193	+	MP00540	1.28e-08	2.56e-05	ctatctctctatctctatcta
Csa7G434970.1	169	189	+	MP00540	2.35e-08	4.26e-05	ctctctatctctctatctcta
Csa7G434970.1	175	195	+	MP00540	4.13e-08	6.54e-05	atctctctatctctatctatc
Csa7G434970.1	179	199	+	MP00540	6.5e-08	9.51e-05	ctctatctctatctatctatc
Csa7G434970.1	626	646	-	MP00540	7.87e-08	0.000111	CACTCTTCCTCTCTTCCTCTC
Csa7G434970.1	185	205	+	MP00540	1.39e-07	0.000184	ctctatctatctatctatctc
Csa7G434970.1	181	201	+	MP00540	2.72e-07	0.000314	ctatctctatctatctatcta
Csa7G434970.1	30	50	-	MP00540	2.83e-07	0.000316	TCCTCTCTCTCTCTTTTCCTT
Csa7G434970.1	177	197	+	MP00540	4.34e-07	0.000458	ctctctatctctatctatcta
Csa7G434970.1	628	648	-	MP00540	5.83e-07	0.000583	CTCACTCTTCCTCTCTTCCTC
Csa7G434970.1	620	640	-	MP00540	2.03e-06	0.00167	TCCTCTCTTCCTCTCTTCCTA
Csa7G434970.1	634	654	-	MP00540	2.64e-06	0.00199	CCCCCTCTCACTCTTCCTCTC
Csa7G434970.1	636	656	-	MP00540	2.71e-06	0.00199	CCCCCCCTCTCACTCTTCCTC
Csa7G434970.1	618	638	-	MP00540	3.11e-06	0.00215	CTCTCTTCCTCTCTTCCTAAA
Csa7G434970.1	630	650	-	MP00540	3.9e-06	0.0024	CTCTCACTCTTCCTCTCTTCC
Csa7G434970.1	36	56	-	MP00540	3.99e-06	0.0024	TTTGTATCCTCTCTCTCTCTT
Csa7G434970.1	32	52	-	MP00540	4.61e-06	0.00266	TATCCTCTCTCTCTCTTTTCC
Csa7G434970.1	183	203	+	MP00540	5.57e-06	0.00307	atctctatctatctatctatc
Csa7G434970.1	624	644	-	MP00540	5.72e-06	0.00311	CTCTTCCTCTCTTCCTCTCTT
Csa7G434970.1	632	652	-	MP00540	6.36e-06	0.00341	CCCTCTCACTCTTCCTCTCTT
Csa7G434970.1	904	924	-	MP00540	8.69e-06	0.00424	CTATACCTCTCTCTTATTCTT
Csa7G434970.1	187	207	+	MP00540	1.14e-05	0.00512	ctatctatctatctatctccc
Csa7G434970.1	189	209	+	MP00540	1.4e-05	0.00561	atctatctatctatctcccct
Csa7G434970.1	622	642	-	MP00540	1.88e-05	0.00694	CTTCCTCTCTTCCTCTCTTCC
Csa7G434970.1	912	932	-	MP00540	2.39e-05	0.00776	TCTTCTCCCTATACCTCTCTC
Csa7G434970.1	28	48	-	MP00540	2.48e-05	0.00781	CTCTCTCTCTCTTTTCCTTCT
Csa7G434970.1	640	660	-	MP00540	2.92e-05	0.00874	ATACCCCCCCCTCTCACTCTT
Csa7G434970.1	1343	1363	+	MP00540	3.3e-05	0.00959	aaatatttctctctcatatta
Csa7G434970.1	98	118	-	MP00540	3.64e-05	0.0101	TTTTGTCTTTGTCTCTGTCTT
Csa7G434970.1	906	926	-	MP00540	3.64e-05	0.0101	CCCTATACCTCTCTCTTATTC
Csa7G434970.1	914	934	-	MP00540	4.08e-05	0.0108	CCTCTTCTCCCTATACCTCTC
Csa7G434970.1	104	124	-	MP00540	5.03e-05	0.012	TTGTTTTTTTGTCTTTGTCTC
Csa7G434970.1	26	46	-	MP00540	5.36e-05	0.0125	CTCTCTCTCTTTTCCTTCTTA
Csa7G434970.1	38	58	-	MP00540	5.38e-05	0.0125	ACTTTGTATCCTCTCTCTCTC
Csa7G434970.1	910	930	-	MP00540	5.72e-05	0.0131	TTCTCCCTATACCTCTCTCTT
Csa7G434970.1	34	54	-	MP00540	5.95e-05	0.0134	TGTATCCTCTCTCTCTCTTTT
Csa7G434970.1	898	918	-	MP00540	6.91e-05	0.0152	CTCTCTCTTATTCTTCTTCTT
Csa7G434970.1	104	123	+	MP00611	4.23e-08	0.000854	gagacaaagacaaaaaaaca
Csa7G434970.1	98	117	+	MP00611	9.39e-08	0.000854	aagacagagacaaagacaaa
Csa7G434970.1	112	131	+	MP00611	6.83e-07	0.00143	gacaaaaaaacaaaaatata
Csa7G434970.1	393	412	-	MP00611	1.03e-06	0.00185	CACAAAAAGAAAAAATGAAA
Csa7G434970.1	30	49	+	MP00611	1.12e-06	0.00185	aaggaaaagagagagagagg
Csa7G434970.1	1029	1048	-	MP00611	2.97e-06	0.00212	TGGAAGGAGACAAGAAAAGA
Csa7G434970.1	1026	1045	-	MP00611	5.56e-06	0.0031	AAGGAGACAAGAAAAGAAAG
Csa7G434970.1	686	705	+	MP00611	5.68e-06	0.00313	gaagacaagacaaaggcaca
Csa7G434970.1	1021	1040	-	MP00611	7.34e-06	0.00369	GACAAGAAAAGAAAGGGGAG
Csa7G434970.1	395	414	-	MP00611	1.08e-05	0.00459	CACACAAAAAGAAAAAATGA
Csa7G434970.1	626	645	+	MP00611	1.48e-05	0.00542	gagaggaagagaggaagagt
Csa7G434970.1	624	643	+	MP00611	1.82e-05	0.00602	aagagaggaagagaggaaga
Csa7G434970.1	904	923	+	MP00611	1.97e-05	0.00638	aagaataagagagaggtata
Csa7G434970.1	620	639	+	MP00611	2.05e-05	0.00646	taggaagagaggaagagagg
Csa7G434970.1	628	647	+	MP00611	2.11e-05	0.00657	gaggaagagaggaagagtga
Csa7G434970.1	92	111	+	MP00611	2.45e-05	0.00727	ctcaacaagacagagacaaa
Csa7G434970.1	32	51	+	MP00611	2.7e-05	0.00771	ggaaaagagagagagaggat
Csa7G434970.1	36	55	+	MP00611	3.7e-05	0.009	aagagagagagaggatacaa
Csa7G434970.1	102	121	+	MP00611	3.88e-05	0.00919	cagagacaaagacaaaaaaa
Csa7G434970.1	34	53	+	MP00611	3.99e-05	0.00926	aaaagagagagagaggatac
Csa7G434970.1	546	565	+	MP00611	5.12e-05	0.0105	aaataaaagaggaagggtaa
Csa7G434970.1	160	179	-	MP00611	6.19e-05	0.0116	GAGATAGAGAGATAGAGAGA
Csa7G434970.1	168	187	-	MP00611	6.19e-05	0.0116	GAGATAGAGAGATAGAGAGA
Csa7G434970.1	385	404	-	MP00611	7.65e-05	0.0131	GAAAAAATGAAAAATGAAAA
Csa7G434970.1	38	57	+	MP00611	8.87e-05	0.0142	gagagagagaggatacaaag
Csa7G434970.1	28	47	+	MP00611	9.18e-05	0.0143	agaaggaaaagagagagaga
Csa7G434970.1	1139	1158	-	MP00611	9.58e-05	0.0146	AGAATAGTGACAAAAGGTGG
Csa7G435470.1	867	890	+	MP00253	1.85e-05	0.00467	gagagaaataaggaaaatgagcaa
Csa7G435470.1	1435	1458	-	MP00253	1.85e-05	0.00467	AGGGAAGATAAAAGAGGTGAGAGA
Csa7G435470.1	865	888	+	MP00253	2.44e-05	0.00547	atgagagaaataaggaaaatgagc
Csa7G435470.1	149	172	+	MP00253	3.86e-05	0.00725	aacaaaaaaaaaaaaaaaaaaaaa
Csa7G435470.1	152	175	+	MP00253	5.59e-05	0.00919	aaaaaaaaaaaaaaaaaaaaaaaa
Csa7G435470.1	153	176	+	MP00253	5.59e-05	0.00919	aaaaaaaaaaaaaaaaaaaaaaaa
Csa7G435470.1	154	177	+	MP00253	5.59e-05	0.00919	aaaaaaaaaaaaaaaaaaaaaaaa
Csa7G435470.1	155	178	+	MP00253	5.59e-05	0.00919	aaaaaaaaaaaaaaaaaaaaaaaa
Csa7G435470.1	156	179	+	MP00253	5.59e-05	0.00919	aaaaaaaaaaaaaaaaaaaaaaaa
Csa7G435470.1	158	181	+	MP00253	5.69e-05	0.00924	aaaaaaaaaaaaaaaaaaaaaata
Csa7G435470.1	162	185	+	MP00253	6.84e-05	0.0103	aaaaaaaaaaaaaaaaaatagtga
Csa7G435470.1	863	886	+	MP00253	7.62e-05	0.0109	tgatgagagaaataaggaaaatga
Csa7G435470.1	151	174	+	MP00253	9.87e-05	0.0131	caaaaaaaaaaaaaaaaaaaaaaa
Csa7G435470.1	637	657	+	MP00540	3.8e-06	0.0024	tctctgttctctctatctcta
Csa7G435470.1	867	887	-	MP00540	3.97e-06	0.0024	CTCATTTTCCTTATTTCTCTC
Csa7G435470.1	643	663	+	MP00540	2.99e-05	0.0089	ttctctctatctctaatattt
Csa7G435470.1	639	659	+	MP00540	4.69e-05	0.0115	tctgttctctctatctctaat
Csa7G435470.1	560	580	-	MP00540	8.15e-05	0.0167	GTATAGGTTTTTCTTTATCTC
Csa7G435470.1	149	168	+	MP00611	1.96e-06	0.00185	aacaaaaaaaaaaaaaaaaa
Csa7G435470.1	151	170	+	MP00611	2.36e-06	0.00185	caaaaaaaaaaaaaaaaaaa
Csa7G435470.1	152	171	+	MP00611	2.39e-06	0.00185	aaaaaaaaaaaaaaaaaaaa
Csa7G435470.1	153	172	+	MP00611	2.39e-06	0.00185	aaaaaaaaaaaaaaaaaaaa
Csa7G435470.1	154	173	+	MP00611	2.39e-06	0.00185	aaaaaaaaaaaaaaaaaaaa
Csa7G435470.1	155	174	+	MP00611	2.39e-06	0.00185	aaaaaaaaaaaaaaaaaaaa
Csa7G435470.1	156	175	+	MP00611	2.39e-06	0.00185	aaaaaaaaaaaaaaaaaaaa
Csa7G435470.1	157	176	+	MP00611	2.39e-06	0.00185	aaaaaaaaaaaaaaaaaaaa
Csa7G435470.1	158	177	+	MP00611	2.39e-06	0.00185	aaaaaaaaaaaaaaaaaaaa
Csa7G435470.1	159	178	+	MP00611	2.39e-06	0.00185	aaaaaaaaaaaaaaaaaaaa
Csa7G435470.1	160	179	+	MP00611	2.39e-06	0.00185	aaaaaaaaaaaaaaaaaaaa
Csa7G435470.1	1182	1201	-	MP00611	2.83e-06	0.00212	AACATAAAAACAAAAATGAA
Csa7G435470.1	161	180	+	MP00611	6.36e-06	0.00334	aaaaaaaaaaaaaaaaaaat
Csa7G435470.1	164	183	+	MP00611	1.13e-05	0.00465	aaaaaaaaaaaaaaaatagt
Csa7G435470.1	162	181	+	MP00611	1.15e-05	0.00467	aaaaaaaaaaaaaaaaaata
Csa7G435470.1	163	182	+	MP00611	1.91e-05	0.00628	aaaaaaaaaaaaaaaaatag
Csa7G435470.1	636	655	-	MP00611	2.2e-05	0.00661	GAGATAGAGAGAACAGAGAG
Csa7G435470.1	150	169	+	MP00611	3.24e-05	0.00823	acaaaaaaaaaaaaaaaaaa
Csa7G435470.1	877	896	+	MP00611	3.84e-05	0.00919	aggaaaatgagcaaaacaat
Csa7G435470.1	1082	1101	-	MP00611	5.36e-05	0.0107	CAAAAGAAAAAAAAAATTAA
Csa7G435470.1	1081	1100	-	MP00611	6.59e-05	0.0119	AAAAGAAAAAAAAAATTAAT
Csa7G435470.1	165	184	+	MP00611	7.79e-05	0.0133	aaaaaaaaaaaaaaatagtg
Csa7G435470.1	560	579	+	MP00611	8.94e-05	0.0142	gagataaagaaaaacctata
Csa7G435500.1	729	752	+	MP00253	2.4e-05	0.00547	gtgagagtatgagagggaagagag
Csa7G435500.1	723	746	+	MP00253	9.74e-05	0.013	aatatggtgagagtatgagaggga
Csa7G435500.1	973	996	-	MP00253	9.83e-05	0.013	GAGACAAGACAAGAAAGGAGGAGG
Csa7G435500.1	721	741	-	MP00540	3.65e-05	0.0101	CTCATACTCTCACCATATTTA
Csa7G435500.1	727	747	-	MP00540	8.46e-05	0.0169	TTCCCTCTCATACTCTCACCA
Csa7G435500.1	809	828	+	MP00611	2.22e-06	0.00185	aagacaatgacaaaaacaca
Csa7G435500.1	975	994	-	MP00611	1.05e-05	0.00457	GACAAGACAAGAAAGGAGGA
Csa7G435500.1	803	822	+	MP00611	1.41e-05	0.00527	aacacaaagacaatgacaaa
Csa7G435500.1	108	127	+	MP00611	3.99e-05	0.00926	atgaaaatgacagaaccaat
Csa7G435500.1	38	57	+	MP00611	4.34e-05	0.00977	caaagaaaaataaaaggaat
Csa7G435500.1	978	997	-	MP00611	4.94e-05	0.0104	GGAGACAAGACAAGAAAGGA
Csa7G435500.1	983	1002	-	MP00611	5.07e-05	0.0105	GGTAAGGAGACAAGACAAGA
Csa7G435500.1	980	999	-	MP00611	9.66e-05	0.0147	AAGGAGACAAGACAAGAAAG
